# Supplementary material
Source: PubMed Central journal article supplement (PMC3686284)
Supplement: NIHMS472693-supplement-1_si_001.pdf [file NIHMS472693-supplement-1_si_001.pdf]

## Supplementary Information

**Supplementary Table 1.** Lennard-Jones potential models with their corresponding  $\eta$  values.

| $\eta$ | LJ model |
|--------|----------|--------|----------|--------|----------|--------|----------|--------|----------|--------|----------|--------|----------|
| 1.0714 | 15-14    | -      | -        | -      | -        | -      | -        | -      | -        | -      | -        | -      | -        |
| 1.0742 | 15-13    | 1.0769 | 14-13    | -      | -        | -      | -        | -      | -        | -      | -        | -      | -        |
| 1.0772 | 15-12    | 1.0801 | 14-12    | 1.0833 | 13-12    | -      | -        | -      | -        | -      | -        | -      | -        |
| 1.0806 | 15-11    | 1.0837 | 14-11    | 1.0871 | 13-11    | 1.0909 | 12-11    | -      | -        | -      | -        | -      | -        |
| 1.0845 | 15-10    | 1.0878 | 14-10    | 1.0914 | 13-10    | 1.0954 | 12-10    | 1.1000 | 11-10    | -      | -        | -      | -        |
| 1.0889 | 15-9     | 1.0924 | 14-9     | 1.0963 | 13-9     | 1.1006 | 12-9     | 1.1055 | 11-9     | 1.1111 | 10-9     | -      | -        |
| 1.0940 | 15-8     | 1.0978 | 14-8     | 1.1020 | 13-8     | 1.1067 | 12-8     | 1.1120 | 11-8     | 1.1180 | 10-8     | 1.1250 | 9-8      |
| 1.1000 | 15-7     | 1.1041 | 14-7     | 1.1087 | 13-7     | 1.1138 | 12-7     | 1.1196 | 11-7     | 1.1262 | 10-7     | 1.1339 | 9-7      |
| 1.1072 | 15-6     | 1.1117 | 14-6     | 1.1168 | 13-6     | 1.1225 | 12-6     | 1.1289 | 11-6     | 1.1362 | 10-6     | 1.1447 | 9-6      |
| 1.1161 | 15-5     | 1.1212 | 14-5     | 1.1269 | 13-5     | 1.1332 | 12-5     | 1.1404 | 11-5     | 1.1487 | 10-5     | 1.1583 | 9-5      |
| 1.1277 | 15-4     | 1.1335 | 14-4     | 1.1399 | 13-4     | 1.1472 | 12-4     | 1.1555 | 11-4     | 1.1650 | 10-4     | 1.1761 | 9-4      |
| 1.1435 | 15-3     | 1.1503 | 14-3     | 1.1579 | 13-3     | 1.1665 | 12-3     | 1.1763 | 11-3     | 1.1877 | 10-3     | 1.2009 | 9-3      |
| 1.1676 | 15-2     | 1.1760 | 14-2     | 1.1855 | 13-2     | 1.1962 | 12-2     | 1.2085 | 11-2     | 1.2228 | 10-2     | 1.2397 | 9-2      |
| 1.2134 | 15-1     | 1.2251 | 14-1     | 1.2383 | 13-1     | 1.2535 | 12-1     | 1.2710 | 11-1     | 1.2915 | 10-1     | 1.3161 | 9-1      |
| $\eta$ | LJ model |
| -      | -        | -      | -        | -      | -        | -      | -        | -      | -        | -      | -        | -      | -        |
| -      | -        | -      | -        | -      | -        | -      | -        | -      | -        | -      | -        | -      | -        |
| -      | -        | -      | -        | -      | -        | -      | -        | -      | -        | -      | -        | -      | -        |
| -      | -        | -      | -        | -      | -        | -      | -        | -      | -        | -      | -        | -      | -        |
| -      | -        | -      | -        | -      | -        | -      | -        | -      | -        | -      | -        | -      | -        |
| -      | -        | -      | -        | -      | -        | -      | -        | -      | -        | -      | -        | -      | -        |
| -      | -        | -      | -        | -      | -        | -      | -        | -      | -        | -      | -        | -      | -        |
| 1.1429 | 8-7      | -      | -        | -      | -        | -      | -        | -      | -        | -      | -        | -      | -        |
| 1.1547 | 8-6      | 1.1667 | 7-6      | -      | -        | -      | -        | -      | -        | -      | -        | -      | -        |
| 1.1696 | 8-5      | 1.1832 | 7-5      | 1.2000 | 6-5      | -      | -        | -      | -        | -      | -        | -      | -        |
| 1.1892 | 8-4      | 1.2051 | 7-4      | 1.2247 | 6-4      | 1.2500 | 5-4      | -      | -        | -      | -        | -      | -        |
| 1.2167 | 8-3      | 1.2359 | 7-3      | 1.2599 | 6-3      | 1.2910 | 5-3      | 1.3333 | 4-3      | -      | -        | -      | -        |
| 1.2599 | 8-2      | 1.2847 | 7-2      | 1.3161 | 6-2      | 1.3572 | 5-2      | 1.4142 | 4-2      | 1.5000 | 3-2      | -      | -        |
| 1.3459 | 8-1      | 1.3831 | 7-1      | 1.4310 | 6-1      | 1.4953 | 5-1      | 1.5874 | 4-1      | 1.7321 | 3-1      | 2.0000 | 2-1      |

**Supplementary Table 2.** Predicted pKd or pKi vs. experimental pKd or pKi for four small scale test sets.

Serine protease test set

| PDB ID | exp. Data | KECSA | scaled KECSA | LISA | LISA+ | PDB ID | exp. Data | KECSA | scaled KECSA | LISA  | LISA+ |
|--------|-----------|-------|--------------|------|-------|--------|-----------|-------|--------------|-------|-------|
| 1aq7   | 6.05      | 6.46  | 6.65         | 8.59 | 7.06  | 1o39   | 7.13      | 6.23  | 6.24         | 6.90  | 7.00  |
| 1bjv   | 4.80      | 5.50  | 4.84         | 5.20 | 5.07  | 1o3b   | 7.13      | 6.18  | 6.15         | 6.32  | 5.52  |
| 1bjv   | 5.54      | 5.52  | 4.89         | 5.01 | 5.00  | 1o3d   | 7.13      | 6.51  | 6.75         | 7.11  | 7.22  |
| 1c1r   | 7.63      | 7.06  | 7.79         | 8.68 | 8.94  | 1o3e   | 7.96      | 6.53  | 6.79         | 6.79  | 6.20  |
| 1c5p   | 4.68      | 5.23  | 4.35         | 3.23 | 3.41  | 1o3f   | 7.96      | 6.60  | 6.92         | 7.13  | 6.78  |
| 1c5q   | 6.36      | 6.89  | 7.48         | 5.17 | 5.39  | 1o3g   | 7.96      | 6.60  | 6.92         | 7.13  | 6.78  |
| 1c5s   | 6.00      | 5.77  | 5.36         | 5.54 | 5.47  | 1o3h   | 7.30      | 5.63  | 5.10         | 5.69  | 6.20  |
| 1c5t   | 4.10      | 5.26  | 4.40         | 5.03 | 4.70  | 1o3i   | 7.30      | 5.71  | 5.25         | 5.67  | 6.23  |
| 1ce5   | 4.74      | 5.92  | 5.65         | 3.86 | 4.02  | 1o3j   | 6.77      | 5.59  | 5.03         | 5.61  | 5.43  |
| 1eb2   | 6.01      | 7.32  | 8.28         | 7.70 | 7.67  | 1o3k   | 6.77      | 5.27  | 4.41         | 5.66  | 6.10  |
| 1f0t   | 6.00      | 6.33  | 6.28         | 6.49 | 5.60  | 1oyq   | 6.96      | 6.21  | 6.20         | 6.28  | 6.31  |
| 1f0u   | 7.16      | 6.71  | 7.14         | 7.55 | 6.85  | 1ppc   | 6.16      | 6.98  | 7.64         | 6.56  | 6.08  |
| 1g36   | 7.17      | 6.46  | 6.66         | 6.51 | 6.46  | 1pph   | 5.92      | 6.32  | 6.30         | 5.66  | 5.20  |
| 1g3b   | 5.74      | 4.58  | 3.11         | 4.15 | 4.42  | 1qb1   | 6.77      | 6.72  | 7.15         | 5.79  | 6.38  |
| 1g3c   | 5.80      | 4.81  | 3.54         | 5.40 | 4.87  | 1qb6   | 6.06      | 5.92  | 5.64         | 5.57  | 5.93  |
| 1g3d   | 5.55      | 4.33  | 2.64         | 3.84 | 4.24  | 1qb9   | 7.44      | 7.06  | 7.80         | 5.62  | 6.07  |
| 1g3e   | 5.38      | 4.26  | 2.51         | 4.16 | 4.55  | 1qbn   | 5.85      | 5.63  | 5.09         | 6.77  | 5.81  |
| 1ghz   | 4.80      | 4.98  | 3.86         | 4.19 | 4.43  | 1qbo   | 7.74      | 6.58  | 6.88         | 5.98  | 5.94  |
| 1gil   | 5.47      | 5.59  | 5.03         | 5.35 | 4.81  | 1ql7   | 5.00      | 7.53  | 8.68         | 6.52  | 6.94  |
| 1gi4   | 7.19      | 7.32  | 8.29         | 9.36 | 9.68  | 1tps   | 8.00      | 7.76  | 9.12         | 11.81 | 9.91  |
| 1gi6   | 6.22      | 5.79  | 5.40         | 4.99 | 4.74  | 1tx7   | 4.60      | 5.18  | 4.25         | 3.96  | 3.91  |
| 1gj6   | 7.00      | 6.83  | 7.36         | 6.95 | 7.70  | 1v2k   | 6.19      | 7.77  | 9.14         | 7.53  | 7.90  |
| 1k1i   | 6.58      | 6.51  | 6.75         | 5.65 | 4.96  | 1v2l   | 4.29      | 5.51  | 4.86         | 3.47  | 3.75  |
| 1k1j   | 7.55      | 7.02  | 7.73         | 7.71 | 6.72  | 1v2m   | 4.29      | 4.94  | 3.79         | 3.11  | 3.00  |
| 1k1l   | 6.90      | 6.88  | 7.46         | 6.36 | 6.13  | 1v2n   | 5.90      | 6.63  | 6.98         | 4.90  | 6.38  |
| 1k1m   | 7.40      | 7.01  | 7.71         | 7.36 | 6.44  | 1v2o   | 4.73      | 5.07  | 4.03         | 5.29  | 5.11  |
| 1k1n   | 6.82      | 6.42  | 6.58         | 5.80 | 5.52  | 1v2p   | 4.73      | 5.42  | 4.71         | 5.79  | 5.10  |
| 1lqe   | 5.82      | 6.78  | 7.27         | 7.51 | 6.36  | 1v2q   | 4.13      | 4.94  | 3.80         | 4.52  | 4.30  |
| 1o2h   | 7.17      | 6.54  | 6.82         | 6.13 | 7.08  | 1v2r   | 3.55      | 5.07  | 4.04         | 5.06  | 5.03  |
| 1o2j   | 6.92      | 5.67  | 5.16         | 5.45 | 5.65  | 1v2s   | 4.17      | 5.74  | 5.30         | 3.62  | 4.05  |
| 1o2k   | 6.92      | 5.68  | 5.19         | 5.65 | 5.88  | 1v2t   | 4.71      | 4.96  | 3.82         | 4.54  | 4.36  |
| 1o2n   | 6.09      | 6.55  | 6.83         | 6.12 | 6.76  | 1v2w   | 4.01      | 5.18  | 4.24         | 5.07  | 4.84  |
| 1o2o   | 6.36      | 6.13  | 6.05         | 4.73 | 5.67  | 1xug   | 7.05      | 6.27  | 6.27         | 7.34  | 7.54  |
| 1o2q   | 7.68      | 6.73  | 7.17         | 6.60 | 7.59  | 1y3v   | 5.64      | 6.95  | 7.58         | 6.95  | 6.69  |
| 1o2s   | 5.47      | 5.39  | 4.64         | 4.88 | 4.51  | 1y3w   | 5.77      | 6.81  | 7.32         | 6.99  | 6.28  |
| 1o2u   | 5.85      | 4.66  | 3.27         | 5.20 | 5.91  | 1y3x   | 5.14      | 6.54  | 6.81         | 6.51  | 6.32  |
| 1o2v   | 5.85      | 5.01  | 3.93         | 5.24 | 5.75  | 1y3y   | 5.64      | 6.17  | 6.13         | 4.52  | 5.29  |
| 1o2w   | 5.85      | 4.85  | 3.62         | 5.24 | 5.64  | 1yp9   | 5.11      | 6.82  | 7.35         | 7.10  | 6.96  |

|      |      |      |      |      |      |      |      |      |      |      |      |
|------|------|------|------|------|------|------|------|------|------|------|------|
| 1o2x | 5.85 | 4.99 | 3.90 | 5.67 | 6.23 | 2zq2 | 6.56 | 7.16 | 7.99 | 7.75 | 6.92 |
| 1o2y | 5.85 | 4.95 | 3.81 | 5.64 | 6.08 | 3aas | 4.51 | 4.82 | 3.56 | 2.66 | 3.50 |
| 1o2z | 6.11 | 5.84 | 5.48 | 6.90 | 7.05 | 3aau | 5.05 | 5.18 | 4.25 | 5.76 | 4.87 |
| 1o30 | 6.77 | 6.25 | 6.29 | 6.76 | 6.80 | 3gy2 | 5.74 | 5.52 | 4.90 | 5.84 | 5.44 |
| 1o32 | 5.74 | 4.67 | 3.27 | 4.42 | 4.63 | 3gy3 | 5.63 | 5.95 | 5.70 | 7.03 | 7.17 |
| 1o33 | 5.74 | 5.38 | 4.62 | 4.93 | 5.45 | 3gy4 | 5.10 | 5.13 | 4.16 | 3.50 | 3.52 |
| 1o34 | 5.74 | 5.54 | 4.93 | 4.68 | 4.67 | 3gy7 | 4.52 | 5.75 | 5.33 | 3.21 | 3.66 |
| 1o36 | 5.96 | 6.11 | 6.01 | 7.12 | 7.02 | 3ljj | 6.52 | 6.57 | 6.86 | 6.24 | 6.85 |
| 1o37 | 6.82 | 6.24 | 6.28 | 6.48 | 7.20 | 3ljo | 6.62 | 6.18 | 6.13 | 5.97 | 6.72 |
| 1o38 | 6.82 | 6.33 | 6.27 | 6.95 | 6.87 | 3nkk | 4.70 | 5.95 | 5.70 | 3.93 | 4.29 |

Endothiapepsin tes set

| PDB ID | exp. Data | KECSA | scaled KECSA | LISA  | LISA+ | PDB ID | exp. Data | KECSA | scaled KECSA | LISA  | LISA+ |
|--------|-----------|-------|--------------|-------|-------|--------|-----------|-------|--------------|-------|-------|
| 4er2   | 9.30      | 7.97  | 9.51         | 8.68  | 7.85  | 1gvx   | 7.22      | 8.46  | 8.46         | 10.27 | 9.26  |
| 1eed   | 4.79      | 7.67  | 8.96         | 8.86  | 7.65  | 2er6   | 7.22      | 8.46  | 8.46         | 10.60 | 9.84  |
| 1ent   | 6.96      | 7.54  | 8.70         | 8.02  | 6.71  | 2er9   | 7.40      | 9.03  | 9.03         | 11.01 | 10.13 |
| 1epo   | 7.96      | 8.58  | 8.58         | 10.47 | 9.90  | 2v00   | 3.66      | 5.41  | 4.68         | 5.51  | 4.99  |
| 1epp   | 7.16      | 7.99  | 9.55         | 9.67  | 8.65  | 3er3   | 7.09      | 8.51  | 8.51         | 9.60  | 7.99  |
| 1epq   | 8.19      | 7.68  | 8.97         | 9.16  | 8.15  | 4er1   | 6.62      | 10.38 | 10.38        | 12.02 | 11.69 |
| 1gvu   | 9.00      | 8.18  | 8.18         | 10.89 | 10.02 | 5er1   | 6.02      | 6.18  | 6.13         | 6.56  | 5.88  |
| 1gvw   | 6.96      | 7.69  | 8.98         | 7.94  | 7.03  | 5er2   | 6.57      | 9.46  | 9.46         | 11.44 | 9.92  |

HIV-1 protease

| PDB ID | exp. Data | KECSA | scaled KECSA | LISA  | LISA+ | PDB ID | exp. Data | KECSA | scaled KECSA | LISA  | LISA+ |
|--------|-----------|-------|--------------|-------|-------|--------|-----------|-------|--------------|-------|-------|
| 1a30   | 4.30      | 5.00  | 3.90         | 4.46  | 4.58  | 1z1r   | 9.22      | 7.86  | 9.31         | 8.28  | 7.88  |
| 1a94   | 7.85      | 8.09  | 8.09         | 9.77  | 8.53  | 1zp8   | 8.77      | 8.18  | 8.18         | 9.03  | 7.99  |
| 1a9m   | 6.92      | 6.83  | 7.37         | 7.81  | 7.17  | 1zpa   | 8.40      | 8.03  | 8.03         | 8.61  | 8.26  |
| 1aaq   | 8.40      | 6.91  | 7.51         | 7.09  | 6.99  | 1zsf   | 9.92      | 8.18  | 8.18         | 8.65  | 8.47  |
| 1aid   | 4.82      | 7.06  | 7.80         | 3.77  | 3.10  | 1zsr   | 9.82      | 8.45  | 8.45         | 9.61  | 8.66  |
| 1ajv   | 7.72      | 9.18  | 9.18         | 10.14 | 9.28  | 2aoc   | 4.89      | 7.42  | 8.48         | 10.58 | 10.16 |
| 1ajx   | 7.91      | 8.65  | 8.65         | 8.60  | 8.19  | 2aod   | 5.66      | 7.54  | 8.70         | 10.69 | 10.33 |
| 1b6j   | 7.92      | 7.81  | 9.21         | 9.11  | 8.96  | 2aoe   | 7.62      | 8.02  | 8.02         | 9.60  | 8.99  |
| 1b6k   | 8.74      | 7.72  | 9.03         | 7.59  | 7.94  | 2aog   | 6.28      | 7.29  | 8.24         | 10.41 | 8.83  |
| 1b6l   | 8.30      | 7.03  | 7.73         | 8.08  | 7.73  | 2aqu   | 9.32      | 7.94  | 9.46         | 9.73  | 9.16  |
| 1b6m   | 8.40      | 7.34  | 8.33         | 7.41  | 8.06  | 2avm   | 5.70      | 7.45  | 8.54         | 10.20 | 9.06  |
| 1b6p   | 8.52      | 7.76  | 9.12         | 8.13  | 8.22  | 2avo   | 8.85      | 8.63  | 8.63         | 10.38 | 10.01 |
| 1bv7   | 9.30      | 11.06 | 11.06        | 14.27 | 12.44 | 2avq   | 4.39      | 7.41  | 8.46         | 10.62 | 9.00  |
| 1bv9   | 9.96      | 11.02 | 11.02        | 12.53 | 11.41 | 2avs   | 7.57      | 8.67  | 8.67         | 10.49 | 10.41 |
| 1bwa   | 8.60      | 11.01 | 11.01        | 11.39 | 10.34 | 2avv   | 9.26      | 8.64  | 8.64         | 9.82  | 9.37  |
| 1bwb   | 8.42      | 11.26 | 11.26        | 12.56 | 11.31 | 2az8   | 8.22      | 6.20  | 6.19         | 5.62  | 4.72  |
| 1c70   | 10.30     | 9.34  | 9.34         | 11.87 | 10.38 | 2az9   | 7.66      | 5.87  | 5.55         | 4.23  | 3.80  |
| 1cpi   | 7.41      | 7.75  | 9.10         | 9.12  | 8.92  | 2bbb   | 8.62      | 9.30  | 9.30         | 10.46 | 10.31 |
| 1d4h   | 10.00     | 9.32  | 9.32         | 10.31 | 10.14 | 2bpv   | 7.67      | 7.77  | 9.13         | 7.61  | 7.64  |
| 1d4i   | 8.85      | 9.73  | 9.73         | 10.65 | 10.73 | 2bpy   | 7.40      | 7.92  | 9.42         | 7.80  | 8.03  |
| 1d4j   | 8.36      | 9.37  | 9.37         | 9.89  | 9.85  | 2bqv   | 8.05      | 8.17  | 8.17         | 8.28  | 8.00  |

|      |       |       |       |       |       |      |       |       |       |       |       |
|------|-------|-------|-------|-------|-------|------|-------|-------|-------|-------|-------|
| 1d4k | 9.22  | 8.76  | 8.76  | 9.67  | 8.00  | 2cej | 8.62  | 8.80  | 8.80  | 9.96  | 9.90  |
| 1d4l | 8.77  | 7.76  | 9.12  | 8.58  | 7.78  | 2cem | 7.92  | 9.06  | 9.06  | 10.43 | 10.28 |
| 1d4y | 11.10 | 8.80  | 8.80  | 7.43  | 7.51  | 2cen | 8.30  | 9.19  | 9.19  | 10.05 | 9.95  |
| 1dif | 10.66 | 9.50  | 9.50  | 10.31 | 10.52 | 2f3k | 7.89  | 8.50  | 8.50  | 10.07 | 9.40  |
| 1dmp | 9.55  | 8.92  | 8.92  | 9.56  | 8.57  | 2f80 | 8.18  | 7.97  | 9.52  | 9.01  | 8.51  |
| 1ebw | 9.05  | 7.87  | 9.33  | 10.03 | 9.30  | 2f81 | 10.52 | 7.97  | 9.52  | 8.28  | 7.82  |
| 1eby | 9.70  | 9.66  | 9.66  | 10.19 | 10.21 | 2f8g | 8.70  | 7.95  | 9.49  | 8.79  | 8.46  |
| 1ebz | 9.40  | 8.65  | 8.65  | 9.52  | 9.59  | 2fgu | 9.18  | 8.71  | 8.71  | 10.02 | 9.47  |
| 1ec0 | 8.49  | 10.13 | 10.13 | 11.01 | 11.17 | 2fgv | 6.12  | 8.68  | 8.68  | 10.34 | 9.73  |
| 1ec1 | 8.92  | 9.28  | 9.28  | 10.28 | 9.54  | 2fle | 7.85  | 8.79  | 8.79  | 10.81 | 11.12 |
| 1ec2 | 10.00 | 8.62  | 8.62  | 10.13 | 9.39  | 2hb3 | 11.35 | 8.04  | 8.04  | 9.76  | 9.10  |
| 1ec3 | 9.04  | 8.58  | 8.58  | 10.36 | 9.63  | 2hs1 | 8.48  | 7.74  | 9.09  | 8.04  | 7.80  |
| 1g2k | 7.96  | 9.06  | 9.06  | 9.79  | 8.90  | 2hs2 | 8.31  | 7.88  | 9.35  | 8.03  | 7.64  |
| 1g35 | 8.14  | 8.99  | 8.99  | 9.74  | 9.21  | 2i0a | 11.40 | 7.97  | 9.51  | 8.77  | 8.23  |
| 1gnm | 6.25  | 7.00  | 7.69  | 7.93  | 6.65  | 2i0d | 12.10 | 8.11  | 8.11  | 8.47  | 7.82  |
| 1gnn | 5.68  | 7.08  | 7.84  | 8.59  | 7.44  | 2i4d | 11.68 | 7.97  | 9.51  | 8.92  | 8.64  |
| 1gno | 7.70  | 6.68  | 7.07  | 6.59  | 6.88  | 2i4u | 11.57 | 7.96  | 9.50  | 8.30  | 8.43  |
| 1hbv | 6.37  | 7.09  | 7.85  | 8.64  | 7.48  | 2i4v | 11.20 | 7.87  | 9.33  | 9.17  | 9.14  |
| 1hef | 9.00  | 8.00  | 9.57  | 10.78 | 9.71  | 2i4w | 11.59 | 8.28  | 8.28  | 10.26 | 10.51 |
| 1heg | 7.74  | 6.63  | 6.98  | 6.36  | 6.57  | 2i4x | 11.72 | 8.24  | 8.24  | 10.59 | 10.32 |
| 1hih | 8.05  | 7.51  | 8.64  | 8.54  | 8.33  | 2idw | 8.89  | 7.60  | 8.81  | 9.14  | 8.22  |
| 1hiv | 9.00  | 8.96  | 8.96  | 10.98 | 10.52 | 2ien | 9.00  | 7.97  | 9.52  | 8.11  | 7.97  |
| 1hos | 8.55  | 8.83  | 8.83  | 7.98  | 7.38  | 2ieo | 8.49  | 7.67  | 8.94  | 8.41  | 7.96  |
| 1hpo | 9.22  | 7.78  | 9.15  | 5.74  | 5.79  | 2o4k | 10.46 | 8.35  | 8.35  | 11.29 | 10.37 |
| 1hps | 9.22  | 8.44  | 8.44  | 9.86  | 8.85  | 2o4l | 9.22  | 9.06  | 9.06  | 9.97  | 9.11  |
| 1hpx | 11.26 | 8.19  | 8.19  | 11.11 | 9.89  | 2o4p | 10.72 | 9.07  | 9.07  | 8.77  | 8.73  |
| 1hsg | 9.42  | 8.46  | 8.46  | 9.40  | 9.26  | 2o4s | 10.51 | 8.71  | 8.71  | 10.44 | 9.95  |
| 1htf | 6.83  | 7.78  | 9.15  | 7.80  | 6.91  | 2p3b | 8.48  | 9.15  | 9.15  | 9.70  | 9.17  |
| 1htg | 8.42  | 9.68  | 9.68  | 10.65 | 10.10 | 2pk5 | 10.70 | 10.44 | 10.44 | 13.53 | 11.92 |
| 1hvh | 7.96  | 8.13  | 8.13  | 7.69  | 6.82  | 2pk6 | 10.89 | 10.17 | 10.17 | 12.51 | 11.37 |
| 1hvi | 10.92 | 8.87  | 8.87  | 9.60  | 9.82  | 2pqz | 5.67  | 9.14  | 9.14  | 9.46  | 7.86  |
| 1hvj | 11.40 | 8.83  | 8.83  | 9.38  | 9.73  | 2psu | 7.62  | 7.65  | 8.92  | 8.36  | 7.45  |
| 1hvk | 10.96 | 9.05  | 9.05  | 10.71 | 10.59 | 2psv | 7.24  | 7.14  | 7.94  | 8.00  | 7.08  |
| 1hvl | 9.95  | 8.79  | 8.79  | 9.38  | 9.56  | 2pwc | 6.57  | 9.06  | 9.06  | 9.24  | 7.77  |
| 1hvr | 9.51  | 10.16 | 10.16 | 9.55  | 8.73  | 2pwr | 6.59  | 9.83  | 9.83  | 10.99 | 9.80  |
| 1hvs | 10.30 | 8.48  | 8.48  | 8.29  | 9.28  | 2pym | 6.82  | 8.10  | 8.10  | 9.15  | 8.98  |
| 1hwr | 8.33  | 6.93  | 7.55  | 6.04  | 5.80  | 2pyn | 7.57  | 8.03  | 8.03  | 9.06  | 9.05  |
| 1hxb | 9.92  | 8.63  | 8.63  | 10.29 | 9.34  | 2q54 | 9.01  | 8.42  | 8.42  | 8.13  | 8.23  |
| 1hxx | 10.82 | 8.96  | 8.96  | 10.75 | 9.47  | 2q55 | 8.69  | 8.70  | 8.70  | 9.58  | 9.27  |
| 1iiq | 7.48  | 8.55  | 8.55  | 9.94  | 9.49  | 2q5k | 11.30 | 8.60  | 8.60  | 9.93  | 9.70  |
| 1izh | 7.70  | 8.93  | 8.93  | 11.36 | 10.93 | 2q63 | 7.18  | 8.28  | 8.28  | 9.57  | 9.56  |
| 1izi | 6.59  | 8.43  | 8.43  | 9.83  | 9.36  | 2q64 | 8.52  | 8.23  | 8.23  | 9.55  | 9.04  |
| 1k6c | 7.48  | 8.18  | 8.18  | 8.54  | 8.37  | 2qci | 8.34  | 8.11  | 8.11  | 9.93  | 9.12  |
| 1k6p | 7.36  | 8.68  | 8.68  | 9.99  | 10.35 | 2qd6 | 8.68  | 7.94  | 9.46  | 8.61  | 8.24  |
|      |       |       |       |       |       | 2qd7 | 9.10  | 7.97  | 9.51  | 9.55  | 8.84  |

|      |       |       |       |       |       |      |       |       |       |       |       |
|------|-------|-------|-------|-------|-------|------|-------|-------|-------|-------|-------|
| 1k6t | 7.62  | 8.34  | 8.34  | 8.87  | 9.01  | 2qd8 | 9.07  | 7.88  | 9.35  | 8.67  | 8.37  |
| 1k6v | 6.92  | 8.68  | 8.68  | 9.67  | 10.21 | 2qhy | 7.48  | 8.80  | 8.80  | 9.50  | 8.02  |
| 1kzk | 10.39 | 8.95  | 8.95  | 11.06 | 9.94  | 2qhz | 7.28  | 9.13  | 9.13  | 9.33  | 7.98  |
| 1lzk | 8.39  | 8.26  | 8.26  | 9.68  | 9.54  | 2qi0 | 7.38  | 9.23  | 9.23  | 9.33  | 8.59  |
| 1m0b | 8.82  | 8.35  | 8.35  | 9.51  | 9.70  | 2qi1 | 7.30  | 8.71  | 8.71  | 10.36 | 9.14  |
| 1mes | 7.70  | 8.61  | 8.61  | 9.54  | 8.74  | 2qi3 | 10.20 | 7.48  | 8.59  | 6.92  | 6.55  |
| 1met | 9.40  | 8.84  | 8.84  | 9.67  | 9.06  | 2qi4 | 10.44 | 8.64  | 8.64  | 9.09  | 8.64  |
| 1meu | 6.10  | 8.78  | 8.78  | 8.98  | 8.53  | 2qi5 | 10.85 | 8.22  | 8.22  | 8.52  | 8.48  |
| 1mrw | 9.70  | 7.87  | 9.33  | 8.93  | 8.65  | 2qi6 | 10.57 | 8.62  | 8.62  | 8.66  | 8.35  |
| 1mrx | 7.26  | 7.83  | 9.25  | 8.77  | 7.99  | 2qi7 | 10.21 | 7.51  | 8.65  | 8.06  | 7.49  |
| 1msm | 10.48 | 8.98  | 8.98  | 10.97 | 9.90  | 2qnn | 7.15  | 10.86 | 10.86 | 10.34 | 8.99  |
| 1msn | 9.09  | 8.71  | 8.71  | 11.09 | 9.89  | 2qnp | 6.41  | 12.12 | 12.12 | 9.17  | 7.47  |
| 1mtr | 8.40  | 7.33  | 8.31  | 7.33  | 8.03  | 2qng | 6.11  | 9.36  | 9.36  | 8.69  | 7.46  |
| 1nh0 | 9.74  | 8.56  | 8.56  | 10.74 | 9.24  | 2r38 | 7.44  | 9.48  | 9.48  | 10.43 | 9.03  |
| 1npa | 8.70  | 9.04  | 9.04  | 9.36  | 8.79  | 2r3t | 5.85  | 9.50  | 9.50  | 10.35 | 8.98  |
| 1npv | 8.24  | 8.58  | 8.58  | 8.45  | 8.77  | 2r3w | 6.89  | 9.07  | 9.07  | 10.55 | 8.68  |
| 1npw | 8.70  | 9.04  | 9.04  | 9.42  | 8.84  | 2r43 | 6.00  | 8.84  | 8.84  | 9.60  | 7.97  |
| 1ody | 8.10  | 9.29  | 9.29  | 10.18 | 9.69  | 2uxz | 8.48  | 8.46  | 8.46  | 9.52  | 9.55  |
| 1ohr | 8.70  | 8.07  | 8.07  | 8.76  | 8.36  | 2uy0 | 6.92  | 8.89  | 8.89  | 10.70 | 10.03 |
| 1pro | 11.30 | 8.70  | 8.70  | 9.27  | 8.95  | 2wkz | 8.77  | 9.25  | 9.25  | 10.80 | 10.16 |
| 1qbr | 10.57 | 11.12 | 11.12 | 12.79 | 11.02 | 2wl0 | 7.80  | 9.07  | 9.07  | 11.01 | 10.46 |
| 1qbs | 9.47  | 8.73  | 8.73  | 10.01 | 8.87  | 2z4o | 9.57  | 8.20  | 8.20  | 8.70  | 8.50  |
| 1qbt | 10.62 | 11.57 | 11.57 | 12.88 | 12.07 | 3a2o | 9.08  | 8.07  | 8.07  | 10.89 | 9.78  |
| 1qbu | 10.24 | 8.94  | 8.94  | 8.47  | 7.95  | 3bc4 | 5.35  | 4.38  | 2.73  | 2.33  | 2.62  |
| 1sbg | 7.74  | 7.57  | 8.75  | 8.49  | 8.36  | 3bgb | 6.05  | 7.30  | 8.25  | 7.44  | 6.90  |
| 1sdt | 9.27  | 8.73  | 8.73  | 10.71 | 10.35 | 3bgc | 5.02  | 9.03  | 9.03  | 7.73  | 7.88  |
| 1sdu | 10.07 | 8.68  | 8.68  | 9.79  | 9.60  | 3bva | 6.52  | 7.33  | 8.31  | 10.05 | 8.71  |
| 1sdv | 8.74  | 8.63  | 8.63  | 9.81  | 9.85  | 3bvb | 5.49  | 7.91  | 9.40  | 9.06  | 8.04  |
| 1t7j | 8.70  | 7.00  | 7.69  | 7.52  | 7.25  | 3cyw | 7.77  | 7.94  | 9.45  | 8.46  | 8.08  |
| 1tcx | 6.95  | 7.41  | 8.45  | 7.94  | 7.66  | 3cyx | 8.00  | 8.68  | 8.68  | 9.67  | 9.84  |
| 1vij | 9.52  | 11.83 | 11.83 | 12.60 | 11.53 | 3d1x | 8.66  | 8.73  | 8.73  | 10.00 | 9.47  |
| 1vik | 9.52  | 12.19 | 12.19 | 12.33 | 12.74 | 3d1y | 8.22  | 8.73  | 8.73  | 10.31 | 9.94  |
| 1w5v | 8.15  | 10.32 | 10.32 | 11.40 | 11.33 | 3d1z | 8.80  | 7.99  | 9.54  | 9.01  | 8.47  |
| 1w5w | 8.80  | 10.57 | 10.57 | 11.18 | 11.29 | 3d20 | 8.30  | 8.13  | 8.13  | 8.82  | 8.64  |
| 1w5x | 8.40  | 10.72 | 10.72 | 11.30 | 11.28 | 3djk | 10.59 | 7.58  | 8.78  | 8.97  | 8.54  |
| 1w5y | 8.48  | 10.50 | 10.50 | 10.36 | 10.63 | 3dk1 | 9.74  | 7.80  | 9.19  | 9.04  | 8.69  |
| 1z1h | 8.40  | 7.64  | 8.89  | 8.30  | 7.64  |      |       |       |       |       |       |

Carbonic anhydrase II test set

| PDB ID | exp. Data | KECSA | scaled KECSA | LISA | LISA+ | PDB ID | exp. Data | KECSA | scaled KECSA | LISA | LISA+ |
|--------|-----------|-------|--------------|------|-------|--------|-----------|-------|--------------|------|-------|
| 1if7   | 10.52     | 7.53  | 8.68         | 7.60 | 8.33  | 2h4n   | 8.70      | 6.72  | 7.15         | 7.64 | 7.92  |
| 1avn   | 3.90      | 2.71  | 2.71         | 0.77 | 0.83  | 2hd6   | 7.80      | 7.40  | 8.43         | 7.92 | 8.39  |
| 1bcd   | 8.70      | 6.97  | 7.62         | 6.05 | 6.00  | 2nng   | 5.36      | 7.10  | 7.87         | 7.49 | 7.68  |
| 1bn1   | 9.34      | 8.09  | 8.09         | 8.23 | 9.49  | 2nno   | 6.40      | 6.88  | 7.45         | 7.46 | 7.95  |
| 1bn3   | 9.89      | 7.69  | 8.98         | 7.25 | 6.04  | 2nns   | 6.05      | 6.84  | 7.37         | 7.31 | 7.75  |

|      |       |      |      |       |      |      |       |      |      |       |       |
|------|-------|------|------|-------|------|------|-------|------|------|-------|-------|
| 1bn4 | 9.31  | 7.97 | 9.52 | 8.12  | 6.65 | 2nnv | 7.52  | 6.78 | 7.27 | 7.50  | 7.88  |
| 1bnn | 10.00 | 8.24 | 8.24 | 8.28  | 6.59 | 2osf | 3.83  | 5.16 | 4.22 | 3.06  | 3.25  |
| 1bnq | 9.49  | 7.91 | 9.40 | 9.90  | 8.26 | 2osm | 6.20  | 4.65 | 3.25 | 2.95  | 3.09  |
| 1bnt | 9.80  | 8.02 | 8.02 | 8.18  | 7.28 | 2pou | 7.42  | 7.96 | 9.49 | 7.92  | 8.15  |
| 1bnu | 9.70  | 8.35 | 8.35 | 10.02 | 6.56 | 2pov | 7.12  | 7.66 | 8.93 | 7.93  | 8.18  |
| 1bnv | 8.77  | 8.12 | 8.12 | 7.99  | 7.50 | 2pow | 7.20  | 7.90 | 9.38 | 7.92  | 8.09  |
| 1bnw | 9.08  | 7.88 | 9.35 | 8.35  | 8.21 | 2q1q | 8.15  | 7.54 | 8.70 | 8.01  | 8.17  |
| 1cil | 9.43  | 7.91 | 9.39 | 8.83  | 9.34 | 2qo8 | 8.47  | 7.32 | 8.28 | 8.49  | 8.66  |
| 1cim | 8.82  | 7.76 | 9.11 | 8.21  | 8.25 | 2qoa | 7.28  | 7.53 | 8.69 | 8.17  | 8.45  |
| 1cin | 8.73  | 7.98 | 9.53 | 8.04  | 8.50 | 2qp6 | 6.68  | 7.57 | 8.76 | 7.77  | 7.96  |
| 1cnw | 7.72  | 6.74 | 7.18 | 8.58  | 7.81 | 2wd3 | 7.07  | 7.53 | 8.68 | 7.95  | 8.45  |
| 1cnx | 7.37  | 6.49 | 6.71 | 7.69  | 7.92 | 2weg | 6.50  | 7.22 | 8.10 | 6.86  | 7.00  |
| 1cny | 7.85  | 6.27 | 6.27 | 6.66  | 5.73 | 2weh | 5.95  | 7.18 | 8.03 | 6.52  | 6.49  |
| 1eou | 7.44  | 7.44 | 8.52 | 9.29  | 6.32 | 2wej | 6.08  | 7.19 | 8.04 | 7.14  | 7.23  |
| 1g1d | 9.44  | 7.01 | 7.70 | 7.13  | 7.34 | 2weo | 6.93  | 7.26 | 8.17 | 6.94  | 7.19  |
| 1g45 | 8.64  | 6.80 | 7.30 | 7.27  | 7.43 | 2x7s | 5.78  | 5.42 | 4.71 | 2.94  | 3.28  |
| 1g46 | 8.80  | 7.04 | 7.76 | 7.36  | 7.73 | 2x7t | 6.63  | 5.91 | 5.63 | 3.91  | 3.14  |
| 1g48 | 8.41  | 7.05 | 7.77 | 7.06  | 7.21 | 2x7u | 5.27  | 5.99 | 5.77 | 2.98  | 3.83  |
| 1g4j | 8.70  | 6.72 | 7.15 | 6.08  | 6.18 | 3b4f | 8.14  | 8.37 | 8.37 | 9.72  | 10.05 |
| 1g4o | 8.25  | 6.57 | 6.87 | 6.91  | 6.95 | 3bet | 5.82  | 8.47 | 8.47 | 8.42  | 8.25  |
| 1g52 | 9.54  | 7.48 | 8.59 | 7.72  | 8.03 | 3bl0 | 6.92  | 6.59 | 6.91 | 7.10  | 6.68  |
| 1g53 | 9.04  | 6.73 | 7.17 | 5.73  | 5.91 | 3bl1 | 5.60  | 8.18 | 8.18 | 8.64  | 8.25  |
| 1g54 | 8.82  | 7.68 | 8.97 | 7.00  | 7.31 | 3c7p | 10.00 | 8.88 | 8.88 | 9.30  | 8.91  |
| 1i8z | 8.90  | 8.91 | 8.91 | 10.45 | 9.63 | 3caj | 8.10  | 7.42 | 8.48 | 8.61  | 8.66  |
| 1i90 | 8.89  | 6.95 | 7.59 | 8.45  | 6.57 | 3d8w | 8.15  | 7.35 | 8.35 | 8.12  | 8.25  |
| 1i91 | 8.94  | 7.87 | 9.33 | 7.50  | 6.77 | 3d9z | 8.70  | 7.22 | 8.09 | 7.68  | 6.98  |
| 1i9l | 8.48  | 6.39 | 6.52 | 6.12  | 6.00 | 3daz | 7.93  | 6.17 | 6.12 | 7.04  | 6.32  |
| 1i9m | 8.48  | 6.57 | 6.86 | 6.42  | 6.08 | 3dbu | 8.06  | 7.30 | 8.26 | 8.28  | 8.22  |
| 1i9n | 8.66  | 6.55 | 6.84 | 5.91  | 5.59 | 3dc3 | 8.31  | 6.77 | 7.24 | 8.07  | 7.62  |
| 1i9o | 8.42  | 7.11 | 7.89 | 6.22  | 6.26 | 3dcc | 8.96  | 7.25 | 8.16 | 8.04  | 7.56  |
| 1i9p | 8.41  | 7.71 | 9.03 | 7.63  | 7.30 | 3dcs | 7.94  | 7.14 | 7.95 | 8.45  | 7.92  |
| 1i9q | 8.41  | 6.72 | 7.15 | 6.11  | 6.25 | 3dcw | 9.00  | 7.53 | 8.69 | 8.98  | 8.79  |
| 1if8 | 9.64  | 7.03 | 7.73 | 6.70  | 6.85 | 3dd0 | 9.00  | 7.41 | 8.46 | 8.70  | 8.53  |
| 1kwr | 6.60  | 6.08 | 5.94 | 5.19  | 5.49 | 3dd8 | 7.85  | 8.03 | 8.03 | 8.64  | 8.98  |
| 1okl | 6.03  | 8.32 | 8.32 | 8.73  | 8.95 | 3eft | 7.92  | 8.02 | 8.02 | 8.34  | 9.11  |
| 1oq5 | 7.68  | 8.77 | 8.77 | 9.22  | 9.52 | 3f8e | 7.23  | 4.68 | 3.30 | 2.52  | 3.65  |
| 1ttm | 7.35  | 7.60 | 8.81 | 6.83  | 7.48 | 3ffp | 7.14  | 7.83 | 9.26 | 10.61 | 9.20  |
| 1xpz | 7.08  | 6.33 | 6.27 | 6.12  | 5.92 | 3hkn | 5.35  | 7.68 | 8.97 | 7.81  | 8.28  |
| 1xq0 | 6.34  | 7.16 | 7.98 | 8.05  | 6.64 | 3hs4 | 8.00  | 7.06 | 7.79 | 8.41  | 7.94  |
| 1yda | 6.55  | 4.74 | 3.41 | 2.96  | 3.33 | 3ibi | 8.59  | 6.68 | 7.07 | 7.48  | 8.24  |
| 1ydb | 8.24  | 6.80 | 7.30 | 8.29  | 7.09 | 3ibl | 7.84  | 6.45 | 6.63 | 8.22  | 7.65  |
| 1ydd | 7.07  | 6.12 | 6.03 | 6.47  | 5.59 | 3ibn | 7.61  | 6.23 | 6.24 | 7.42  | 7.37  |
| 1ze8 | 7.68  | 7.64 | 8.89 | 9.58  | 9.89 | 3ibu | 9.15  | 6.92 | 7.53 | 8.39  | 8.89  |
| 2aw1 | 7.37  | 7.93 | 9.44 | 8.11  | 8.84 | 3ieo | 6.48  | 3.58 | 3.58 | -0.20 | 1.66  |
| 2ez7 | 4.36  | 3.10 | 3.10 | 1.44  | 2.75 | 3igp | 7.02  | 7.14 | 7.94 | 7.32  | 7.51  |

|      |      |      |      |       |       |      |      |      |      |       |      |
|------|------|------|------|-------|-------|------|------|------|------|-------|------|
| 2f14 | 9.19 | 9.09 | 9.09 | 10.82 | 10.10 | 3k2f | 7.20 | 7.97 | 9.52 | 10.99 | 8.83 |
| 2fou | 7.10 | 5.27 | 4.41 | 4.23  | 3.36  | 3m1k | 5.39 | 5.30 | 4.48 | 4.24  | 4.23 |
| 2fov | 7.55 | 7.29 | 8.24 | 8.39  | 8.18  | 3m67 | 6.74 | 8.55 | 8.55 | 9.25  | 8.69 |
| 2gd8 | 7.41 | 7.62 | 8.85 | 7.73  | 7.43  | 3mhc | 7.96 | 8.11 | 8.11 | 9.42  | 9.16 |
| 2h15 | 5.67 | 7.11 | 7.89 | 7.41  | 7.93  | 3mnu | 7.32 | 7.40 | 8.44 | 7.51  | 8.51 |

**Supplementary Table 3.** Leave-One-Out result compared with training result and experimental  $pK_d$  or  $pK_i$ .

| PDB ID | exp. Data (pKd) | Training Result (pKd) | Leave-One-Out Result (pKd) | PDB ID | exp. Data (pKd) | Training Result (pKd) | Leave-One-Out Result (pKd) |
|--------|-----------------|-----------------------|----------------------------|--------|-----------------|-----------------------|----------------------------|
| 2r58   | 2.00            | 3.63                  | 3.76                       | 3k1j   | 6.40            | 5.46                  | 5.76                       |
| 3c2f   | 2.00            | 3.74                  | 3.91                       | 1i80   | 6.41            | 5.93                  | 5.82                       |
| 3pce   | 2.00            | 5.81                  | 5.71                       | 1pye   | 6.41            | 7.16                  | 7.19                       |
| 1jfh   | 2.05            | 4.43                  | 4.54                       | 1syh   | 6.41            | 6.56                  | 6.59                       |
| 2w8w   | 2.12            | 5.72                  | 5.78                       | 2cgf   | 6.41            | 5.08                  | 5.04                       |
| 3gv9   | 2.12            | 4.56                  | 4.47                       | 2qnp   | 6.41            | 10.23                 | 12.12                      |
| 4tim   | 2.16            | 4.77                  | 4.84                       | 2zdm   | 6.41            | 6.69                  | 6.55                       |
| 3gqz   | 2.17            | 4.53                  | 4.40                       | 1o5a   | 6.42            | 6.46                  | 6.44                       |
| 3l7d   | 2.18            | 6.71                  | 6.64                       | 1w0y   | 6.42            | 6.63                  | 6.63                       |
| 1x8d   | 2.21            | 4.73                  | 4.70                       | 2j78   | 6.42            | 6.07                  | 5.97                       |
| 1icj   | 2.22            | 3.98                  | 3.98                       | 1fh9   | 6.43            | 5.97                  | 5.94                       |
| 1m0n   | 2.22            | 6.88                  | 6.89                       | 2b07   | 6.43            | 7.25                  | 7.31                       |
| 2aac   | 2.22            | 5.50                  | 5.55                       | 2cia   | 6.43            | 7.50                  | 7.25                       |
| 1ajp   | 2.23            | 5.10                  | 5.06                       | 2fqo   | 6.43            | 4.94                  | 5.12                       |
| 1uto   | 2.27            | 4.29                  | 4.28                       | 2ivu   | 6.43            | 7.37                  | 7.27                       |
| 3ip8   | 2.28            | 6.03                  | 5.93                       | 1jqe   | 6.44            | 6.90                  | 6.81                       |
| 3mhw   | 2.30            | 6.05                  | 6.08                       | 2jh5   | 6.44            | 6.93                  | 6.77                       |
| 3pcg   | 2.30            | 6.18                  | 6.07                       | 2pvm   | 6.44            | 5.63                  | 5.69                       |
| 1m0o   | 2.31            | 6.18                  | 6.30                       | 1gt3   | 6.46            | 4.72                  | 4.61                       |
| 1qi0   | 2.35            | 4.31                  | 4.20                       | 1m2r   | 6.46            | 6.36                  | 6.40                       |
| 3gtc   | 2.35            | 4.40                  | 4.28                       | 1r5y   | 6.46            | 6.54                  | 6.39                       |
| 3g2z   | 2.36            | 3.91                  | 3.72                       | 2xdx   | 6.46            | 5.57                  | 5.55                       |
| 6rnt   | 2.37            | 4.15                  | 4.21                       | 3pd8   | 6.46            | 6.10                  | 6.04                       |
| 1nwl   | 2.39            | 5.51                  | 5.45                       | 1j01   | 6.47            | 6.00                  | 5.93                       |
| 3dxg   | 2.40            | 3.36                  | 3.27                       | 3cm2   | 6.47            | 6.37                  | 6.45                       |
| 3l7b   | 2.40            | 5.96                  | 5.82                       | 3gcq   | 6.47            | 7.71                  | 7.78                       |
| 1oba   | 2.44            | 4.04                  | 3.94                       | 1f4g   | 6.48            | 6.05                  | 5.83                       |
| 2i2b   | 2.44            | 4.54                  | 4.57                       | 1gpn   | 6.48            | 7.16                  | 7.02                       |
| 3l7c   | 2.44            | 6.04                  | 6.06                       | 1rpj   | 6.48            | 6.13                  | 6.11                       |

|       |      |      |      |       |      |      |      |
|-------|------|------|------|-------|------|------|------|
| 3l79  | 2.46 | 5.86 | 5.73 | 2wnj  | 6.48 | 6.97 | 6.98 |
| ltok  | 2.47 | 4.74 | 4.61 | 3gsm  | 6.48 | 4.28 | 4.08 |
| lutl  | 2.47 | 4.63 | 4.69 | ldl7  | 6.49 | 4.90 | 4.89 |
| lgyx  | 2.48 | 4.96 | 4.81 | 3bft  | 6.49 | 5.45 | 5.60 |
| lai4  | 2.50 | 5.23 | 5.22 | lxa5  | 6.50 | 8.49 | 8.47 |
| 3g30  | 2.51 | 5.63 | 5.75 | 2g72  | 6.50 | 7.78 | 7.89 |
| 3bfl  | 2.52 | 4.14 | 4.27 | 3bwj  | 6.50 | 7.13 | 6.98 |
| 3gr2  | 2.52 | 3.53 | 3.28 | 2jdh  | 6.51 | 4.02 | 3.88 |
| 3kqp  | 2.57 | 4.72 | 4.77 | 2xjj  | 6.51 | 6.80 | 6.65 |
| 3gvb  | 2.59 | 5.83 | 5.70 | 3cj4  | 6.51 | 5.79 | 5.20 |
| 2r5a  | 2.60 | 3.46 | 3.54 | 3hf8  | 6.51 | 7.01 | 7.59 |
| 3f37  | 2.62 | 4.91 | 4.78 | lalw  | 6.52 | 4.26 | 4.20 |
| 3f38  | 2.62 | 4.39 | 4.40 | lct8  | 6.52 | 6.61 | 6.54 |
| 3fk1  | 2.62 | 5.61 | 5.74 | lg74  | 6.52 | 6.28 | 6.16 |
| lajn  | 2.63 | 4.90 | 4.81 | lgt4  | 6.52 | 5.05 | 4.91 |
| lo8b  | 2.68 | 4.64 | 4.78 | lk9s  | 6.52 | 5.86 | 5.79 |
| 2fzc  | 2.70 | 4.59 | 4.64 | lqy1  | 6.52 | 5.32 | 5.33 |
| 3bra  | 2.70 | 3.56 | 3.63 | lzhly | 6.52 | 7.37 | 7.38 |
| 3gsg  | 2.70 | 5.09 | 4.89 | 2h4g  | 6.52 | 5.79 | 5.36 |
| lpfu  | 2.72 | 4.21 | 4.42 | 2nt7  | 6.52 | 8.11 | 7.64 |
| 2qwb  | 2.74 | 4.58 | 4.57 | 2oxy  | 6.52 | 5.46 | 4.19 |
| 2vyt  | 2.74 | 3.34 | 3.47 | 2pfy  | 6.52 | 6.48 | 6.37 |
| 2bet  | 2.77 | 4.64 | 4.58 | 2zft  | 6.52 | 6.63 | 6.49 |
| 2bza  | 2.80 | 5.57 | 5.57 | 3bva  | 6.52 | 7.45 | 7.33 |
| 3djx  | 2.81 | 3.83 | 3.75 | 3hjo  | 6.52 | 4.16 | 3.71 |
| l cet | 2.89 | 5.05 | 4.91 | 2p7g  | 6.53 | 6.71 | 6.58 |
| liih  | 2.89 | 4.68 | 4.72 | ldrv  | 6.54 | 6.66 | 6.95 |
| lugp  | 2.89 | 4.14 | 4.02 | 2jdk  | 6.54 | 4.02 | 3.80 |
| 2wpb  | 2.89 | 4.06 | 3.90 | 2zfs  | 6.54 | 6.89 | 6.81 |
| 2wtx  | 2.89 | 4.91 | 4.99 | 2zhd  | 6.54 | 7.00 | 6.88 |
| 3f36  | 2.89 | 5.02 | 4.91 | 3d0b  | 6.54 | 6.68 | 6.65 |
| 3g31  | 2.89 | 3.37 | 3.19 | 3jvs  | 6.54 | 6.24 | 5.90 |
| 3c2u  | 2.90 | 5.31 | 5.48 | ldhj  | 6.55 | 4.98 | 5.12 |
| 2fw6  | 2.92 | 5.28 | 5.24 | lhmr  | 6.55 | 5.19 | 5.13 |
| 2fwp  | 2.92 | 5.27 | 5.27 | ln4h  | 6.55 | 5.95 | 5.72 |
| ltng  | 2.93 | 5.32 | 5.25 | lyc4  | 6.55 | 5.66 | 5.65 |
| lf4e  | 2.96 | 4.74 | 4.60 | 2bok  | 6.55 | 6.82 | 6.72 |
| 2w8j  | 2.96 | 5.76 | 5.80 | 2zq2  | 6.56 | 7.37 | 7.16 |
| 3dhv  | 2.96 | 5.63 | 5.77 | lsld  | 6.57 | 6.74 | 6.78 |
| 3g34  | 2.96 | 4.54 | 4.48 | 2fqy  | 6.57 | 6.06 | 6.17 |
| 3imc  | 2.96 | 5.94 | 5.84 | 2hzl  | 6.57 | 5.91 | 5.85 |
| 2hw2  | 2.97 | 7.01 | 7.15 | 2pwc  | 6.57 | 8.93 | 9.06 |
| 3ckb  | 2.98 | 4.16 | 4.10 | 5er2  | 6.57 | 9.41 | 9.46 |
| 3dj q | 2.98 | 3.39 | 3.41 | lkli  | 6.58 | 6.79 | 6.51 |
| lws4  | 3.00 | 4.67 | 4.56 | 2p7z  | 6.58 | 7.54 | 7.48 |



|      |      |      |      |      |      |       |       |
|------|------|------|------|------|------|-------|-------|
| 2q8h | 3.00 | 4.50 | 4.20 | 1b58 | 6.59 | 6.87  | 7.19  |
| 2v3u | 3.00 | 5.73 | 5.84 | 1fiv | 6.59 | 9.63  | 9.75  |
| 3ime | 3.00 | 4.84 | 4.77 | 1izi | 6.59 | 8.68  | 8.43  |
| 1utm | 3.01 | 4.13 | 4.13 | 2pvh | 6.59 | 5.82  | 5.81  |
| 1ogd | 3.03 | 4.81 | 4.82 | 2pwr | 6.59 | 9.79  | 9.83  |
| 1ws5 | 3.03 | 4.65 | 4.56 | 2v7d | 6.59 | 4.86  | 4.98  |
| 2ha3 | 3.03 | 5.06 | 4.99 | 3gs6 | 6.59 | 4.39  | 4.21  |
| 3adv | 3.03 | 4.82 | 4.84 | 1g7g | 6.60 | 6.82  | 6.47  |
| 1uj5 | 3.05 | 5.21 | 5.21 | 1jzs | 6.60 | 5.51  | 5.37  |
| 1uj6 | 3.05 | 5.03 | 4.98 | 1vot | 6.60 | 6.61  | 6.61  |
| 2jfh | 3.06 | 5.43 | 5.22 | 2euk | 6.60 | 9.27  | 9.04  |
| 1y1z | 3.08 | 6.57 | 6.63 | 2j4g | 6.60 | 6.64  | 6.73  |
| 1ugw | 3.09 | 4.55 | 4.61 | 2jdp | 6.60 | 4.25  | 4.23  |
| 1pu7 | 3.10 | 5.40 | 5.46 | 2wly | 6.60 | 6.66  | 6.71  |
| 1pu8 | 3.10 | 5.41 | 5.42 | 3cwk | 6.60 | 5.85  | 5.60  |
| 2xdl | 3.10 | 5.33 | 5.26 | 3mo2 | 6.61 | 7.18  | 7.52  |
| 3buf | 3.10 | 3.69 | 3.71 | 1afk | 6.62 | 4.47  | 4.65  |
| 3f78 | 3.10 | 4.88 | 5.28 | 1ii5 | 6.62 | 5.28  | 5.37  |
| 3c2r | 3.11 | 5.34 | 5.18 | 2j7b | 6.62 | 5.90  | 5.88  |
| 1e6q | 3.15 | 5.64 | 5.51 | 2jgs | 6.62 | 5.88  | 5.95  |
| 3f34 | 3.16 | 4.89 | 4.76 | 2vwc | 6.62 | 5.85  | 5.82  |
| 3f35 | 3.16 | 4.89 | 4.80 | 2zb0 | 6.62 | 7.37  | 7.37  |
| 1lbk | 3.18 | 5.21 | 5.17 | 2zq1 | 6.62 | 6.44  | 6.34  |
| 1ro7 | 3.18 | 7.08 | 7.14 | 3ljo | 6.62 | 6.34  | 6.18  |
| 3bug | 3.18 | 4.12 | 4.17 | 4er1 | 6.62 | 10.33 | 10.38 |
| 3dxh | 3.19 | 3.47 | 3.53 | 3f8f | 6.63 | 5.62  | 5.90  |
| 1s5z | 3.21 | 4.35 | 4.59 | 2b1g | 6.64 | 6.89  | 6.80  |
| 1br6 | 3.22 | 5.36 | 5.34 | 2d3z | 6.64 | 6.52  | 6.63  |
| 1e6s | 3.22 | 5.82 | 5.74 | 2j75 | 6.65 | 6.05  | 6.12  |
| 1k1y | 3.22 | 6.49 | 6.48 | 1a4r | 6.66 | 5.06  | 5.08  |
| 1tog | 3.22 | 5.71 | 5.55 | 1elc | 6.66 | 7.29  | 7.66  |
| 1zc9 | 3.22 | 4.25 | 4.53 | 1o3p | 6.66 | 5.94  | 6.01  |
| 2ri9 | 3.22 | 4.10 | 4.01 | 1pxp | 6.66 | 6.43  | 6.52  |
| 2uy3 | 3.22 | 5.20 | 4.96 | 2xj7 | 6.66 | 6.58  | 6.53  |
| 1v2j | 3.25 | 6.19 | 6.03 | 3ew2 | 6.67 | 6.16  | 6.19  |
| 5yas | 3.26 | 4.61 | 5.31 | 3g19 | 6.67 | 4.30  | 4.30  |
| 3ioe | 3.27 | 6.08 | 6.20 | 1c5x | 6.68 | 6.52  | 7.47  |
| 1bcu | 3.28 | 4.89 | 4.88 | 1mai | 6.68 | 3.94  | 4.08  |
| 1d7j | 3.30 | 4.30 | 4.14 | 2fqw | 6.68 | 6.19  | 6.09  |
| 1phw | 3.30 | 3.85 | 3.87 | 2iwx | 6.68 | 5.22  | 5.20  |
| 1tpw | 3.30 | 4.55 | 4.67 | 2qbs | 6.68 | 6.51  | 6.05  |
| 3aaq | 3.30 | 6.00 | 5.79 | 3ie3 | 6.68 | 3.83  | 3.67  |
| 3hem | 3.30 | 4.04 | 3.82 | 3lpf | 6.68 | 6.72  | 6.64  |
| 1pzp | 3.31 | 5.16 | 5.15 | 1b0h | 6.70 | 7.59  | 8.10  |
| 1pzo | 3.32 | 5.64 | 5.23 | 1b3g | 6.70 | 6.27  | 6.69  |

|      |      |      |      |      |      |      |      |
|------|------|------|------|------|------|------|------|
| 2wk6 | 3.32 | 6.48 | 7.30 | ldfo | 6.70 | 6.81 | 6.43 |
| 1jlr | 3.33 | 4.58 | 4.69 | 1eld | 6.70 | 7.12 | 7.51 |
| 3f33 | 3.34 | 5.75 | 5.75 | 1f3e | 6.70 | 5.11 | 5.06 |
| 3c2o | 3.35 | 5.06 | 4.93 | 1hp0 | 6.70 | 5.75 | 5.75 |
| 2vc7 | 3.36 | 6.05 | 6.14 | 1koj | 6.70 | 4.60 | 4.66 |
| 1tnh | 3.37 | 5.61 | 5.70 | 1qy5 | 6.70 | 4.26 | 4.22 |
| 1v2u | 3.37 | 5.80 | 5.62 | 1rdt | 6.70 | 7.68 | 7.57 |
| 3d8z | 3.37 | 4.39 | 4.22 | 1rek | 6.70 | 8.81 | 8.78 |
| 2fzg | 3.38 | 6.28 | 6.19 | 1xr8 | 6.70 | 8.24 | 8.40 |
| 1toj | 3.39 | 5.50 | 5.36 | 2eum | 6.70 | 6.27 | 6.25 |
| 1ikt | 3.40 | 5.90 | 5.90 | 2evl | 6.70 | 7.96 | 7.86 |
| 1183 | 3.40 | 6.29 | 6.14 | 2oxx | 6.70 | 6.30 | 5.07 |
| 1uz4 | 3.40 | 5.82 | 5.73 | 3eko | 6.70 | 5.16 | 5.07 |
| 2201 | 3.40 | 6.46 | 6.32 | 3pck | 6.70 | 4.74 | 4.66 |
| 2vvp | 3.40 | 5.33 | 5.31 | 1rbp | 6.72 | 6.46 | 6.24 |
| 3d8y | 3.40 | 4.61 | 4.38 | 2jdu | 6.72 | 4.69 | 4.67 |
| 2v2c | 3.41 | 5.05 | 5.12 | 2vpn | 6.72 | 6.27 | 6.19 |
| 2qtn | 3.42 | 4.83 | 4.69 | 2xc0 | 6.72 | 7.58 | 7.83 |
| 2sim | 3.42 | 4.89 | 4.82 | 3gst | 6.72 | 7.09 | 7.16 |
| 2w08 | 3.42 | 2.97 | 3.13 | 314v | 6.72 | 5.23 | 5.34 |
| 3iob | 3.42 | 5.57 | 5.63 | 314z | 6.72 | 5.70 | 5.77 |
| 1moq | 3.46 | 4.59 | 4.80 | 1wvj | 6.73 | 6.25 | 6.30 |
| 2p3i | 3.48 | 3.79 | 3.82 | 1usi | 6.74 | 6.43 | 6.53 |
| 3gx0 | 3.48 | 5.31 | 5.39 | 2zc9 | 6.74 | 6.98 | 6.85 |
| 1c5o | 3.49 | 5.24 | 5.14 | 2zgx | 6.74 | 6.36 | 6.23 |
| 1utn | 3.49 | 5.82 | 5.83 | 3fzy | 6.74 | 6.16 | 6.24 |
| 2r0h | 3.51 | 4.63 | 4.53 | 3heg | 6.74 | 7.78 | 8.01 |
| 1jys | 3.52 | 3.93 | 3.94 | 3ikd | 6.75 | 6.22 | 6.25 |
| 2j27 | 3.52 | 4.47 | 4.51 | 2on6 | 6.76 | 6.02 | 5.85 |
| 3lcu | 3.52 | 6.71 | 6.95 | 1o30 | 6.77 | 6.20 | 6.25 |
| 1vjd | 3.54 | 5.83 | 6.08 | 1o3j | 6.77 | 5.99 | 5.59 |
| 3obq | 3.54 | 7.45 | 7.18 | 1o3k | 6.77 | 5.55 | 5.27 |
| 1v2r | 3.55 | 5.24 | 5.07 | 1om1 | 6.77 | 7.01 | 6.77 |
| 2cle | 3.55 | 6.01 | 6.27 | 1ony | 6.77 | 6.90 | 6.64 |
| 2clf | 3.55 | 5.93 | 6.24 | 1qb1 | 6.77 | 6.60 | 6.72 |
| 2clm | 3.55 | 6.03 | 6.31 | 3gcu | 6.78 | 7.77 | 7.97 |
| 2qwc | 3.55 | 4.78 | 4.68 | 2rcb | 6.79 | 5.92 | 6.07 |
| 2hrm | 3.56 | 4.75 | 4.69 | 1fl3 | 6.80 | 6.63 | 6.52 |
| 1h46 | 3.57 | 5.88 | 5.87 | 1nq7 | 6.80 | 6.33 | 6.13 |
| 1nli | 3.59 | 5.78 | 5.81 | 1p1n | 6.80 | 5.74 | 5.66 |
| 2nn8 | 3.59 | 3.43 | 3.35 | 3d94 | 6.80 | 8.01 | 7.99 |
| 1d7i | 3.60 | 4.71 | 4.82 | 3bc3 | 6.81 | 9.43 | 8.99 |
| 2fzk | 3.60 | 6.02 | 5.96 | 1drk | 6.82 | 6.17 | 6.14 |
| 2qpu | 3.60 | 3.86 | 3.83 | 1fhd | 6.82 | 5.91 | 5.90 |
| 2wp1 | 3.60 | 5.40 | 5.20 | 1jeu | 6.82 | 5.77 | 6.20 |

|      |      |      |      |      |      |      |      |
|------|------|------|------|------|------|------|------|
| 2xdk | 3.60 | 4.51 | 4.58 | 1k1n | 6.82 | 6.66 | 6.42 |
| 3b3x | 3.60 | 3.90 | 3.89 | 1o38 | 6.82 | 6.14 | 6.33 |
| 3g0i | 3.60 | 5.47 | 5.44 | 1uwf | 6.82 | 5.01 | 4.90 |
| 3jdw | 3.60 | 4.56 | 4.75 | 1xh7 | 6.82 | 9.51 | 9.42 |
| 3jzj | 3.61 | 7.48 | 7.45 | 2bli | 6.82 | 7.23 | 7.18 |
| 1pb9 | 3.62 | 6.40 | 6.48 | 2c94 | 6.82 | 6.34 | 6.47 |
| 1gyy | 3.64 | 4.96 | 4.91 | 2oxd | 6.82 | 6.13 | 4.80 |
| 2azr | 3.64 | 5.70 | 5.73 | 2pym | 6.82 | 8.12 | 8.10 |
| 2qv7 | 3.66 | 4.81 | 5.03 | 2v8w | 6.82 | 4.37 | 4.40 |
| 2v00 | 3.66 | 5.49 | 5.41 | 2wk2 | 6.82 | 7.60 | 7.89 |
| 3buh | 3.66 | 5.01 | 5.06 | 2zq0 | 6.82 | 6.96 | 6.81 |
| 3oy8 | 3.66 | 3.48 | 3.39 | 3dnj | 6.82 | 5.77 | 5.81 |
| 3pen | 3.66 | 5.55 | 5.44 | 2xnb | 6.83 | 6.58 | 6.70 |
| 1c3x | 3.68 | 5.69 | 6.39 | 1bhx | 6.84 | 6.96 | 6.84 |
| 3ioc | 3.68 | 7.13 | 7.25 | 1ele | 6.85 | 6.28 | 6.72 |
| 3isj | 3.68 | 5.61 | 5.59 | 1g30 | 6.85 | 6.81 | 6.75 |
| 2a8g | 3.69 | 5.29 | 5.23 | 1lkk | 6.85 | 5.89 | 5.62 |
| 3clp | 3.69 | 5.65 | 5.76 | 1os5 | 6.85 | 6.48 | 6.48 |
| 3d7b | 3.69 | 4.07 | 3.89 | 1q72 | 6.85 | 5.90 | 5.91 |
| 1loq | 3.70 | 5.45 | 5.31 | 1xk9 | 6.85 | 6.06 | 5.91 |
| 1wht | 3.70 | 5.60 | 5.50 | 1xt8 | 6.85 | 5.78 | 6.04 |
| 2bvr | 3.70 | 6.08 | 5.78 | 3aid | 6.86 | 7.04 | 6.97 |
| 2fx6 | 3.70 | 5.98 | 5.88 | 3mo5 | 6.87 | 6.68 | 7.23 |
| 3l59 | 3.70 | 4.43 | 4.18 | 1xka | 6.88 | 6.72 | 6.61 |
| 2vfk | 3.71 | 4.12 | 4.23 | 1b3f | 6.89 | 6.42 | 6.81 |
| 3fj7 | 3.71 | 4.89 | 4.95 | 1fh8 | 6.89 | 5.86 | 5.73 |
| 3g32 | 3.71 | 4.28 | 4.09 | 1jev | 6.89 | 7.45 | 7.91 |
| 1ai5 | 3.72 | 5.32 | 5.23 | 1sb1 | 6.89 | 8.03 | 7.87 |
| 3f5l | 3.72 | 6.14 | 6.15 | 1uzl | 6.89 | 6.17 | 6.14 |
| 1f5k | 3.74 | 5.53 | 5.43 | 2bfq | 6.89 | 5.80 | 6.00 |
| 2wq5 | 3.74 | 5.93 | 6.11 | 2dri | 6.89 | 6.27 | 6.27 |
| 2iyf | 3.75 | 5.35 | 5.59 | 2f34 | 6.89 | 5.29 | 5.19 |
| 2pyi | 3.75 | 6.17 | 6.05 | 2r3w | 6.89 | 9.09 | 9.07 |
| 3d6p | 3.75 | 3.95 | 3.79 | 2vk2 | 6.89 | 5.71 | 5.73 |
| 2x09 | 3.76 | 5.53 | 5.68 | 3l4x | 6.89 | 5.02 | 5.25 |
| 3d6q | 3.76 | 4.16 | 3.97 | 1k1l | 6.90 | 6.85 | 6.88 |
| 2v2h | 3.77 | 5.27 | 5.33 | 3cow | 6.90 | 6.25 | 6.44 |
| 3nq3 | 3.78 | 4.70 | 4.55 | 3gbb | 6.90 | 5.86 | 5.96 |
| 2clk | 3.79 | 5.01 | 5.13 | 3evc | 6.91 | 3.93 | 3.97 |
| 1li6 | 3.80 | 5.73 | 5.60 | 3evd | 6.91 | 4.57 | 4.64 |
| 1nje | 3.80 | 5.10 | 5.07 | 1a9m | 6.92 | 6.98 | 6.83 |
| 2hb1 | 3.80 | 5.36 | 4.97 | 1o2j | 6.92 | 5.60 | 5.67 |
| 3g2h | 3.82 | 5.69 | 5.62 | 1pkx | 6.92 | 7.14 | 7.00 |
| 1j16 | 3.84 | 5.62 | 5.51 | 1swr | 6.92 | 6.74 | 6.63 |
| 1utj | 3.84 | 5.29 | 5.31 | 2d3u | 6.92 | 6.22 | 6.46 |

|      |      |      |      |      |      |      |      |
|------|------|------|------|------|------|------|------|
| 3lzz | 3.84 | 3.86 | 4.02 | 2g78 | 6.92 | 5.56 | 5.46 |
| 1n1t | 3.85 | 4.87 | 4.77 | 2g79 | 6.92 | 5.61 | 5.46 |
| 2wzs | 3.85 | 5.22 | 5.17 | 2uy0 | 6.92 | 9.32 | 8.89 |
| 3lbz | 3.86 | 5.64 | 5.39 | 1tcx | 6.95 | 7.39 | 7.41 |
| 1aj7 | 3.87 | 5.50 | 5.39 | 1c5c | 6.96 | 6.32 | 6.28 |
| 3g2l | 3.87 | 6.26 | 6.16 | 1ent | 6.96 | 7.64 | 7.54 |
| 1m0q | 3.89 | 6.22 | 6.33 | 1gj8 | 6.96 | 5.72 | 5.91 |
| 3iae | 3.89 | 8.27 | 8.47 | 1gvw | 6.96 | 7.78 | 7.69 |
| 3obx | 3.89 | 7.17 | 6.87 | 1oyq | 6.96 | 6.37 | 6.21 |
| 1slg | 3.90 | 6.71 | 6.54 | 1x8j | 6.96 | 6.07 | 5.85 |
| 2gvv | 3.90 | 5.02 | 4.99 | 3hv8 | 6.98 | 5.97 | 6.11 |
| 2qw1 | 3.90 | 2.88 | 2.78 | 1fki | 7.00 | 5.96 | 5.98 |
| 2rkm | 3.90 | 4.83 | 5.27 | 1fpc | 7.00 | 6.71 | 6.70 |
| 2vhj | 3.90 | 5.50 | 5.69 | 1gj6 | 7.00 | 6.90 | 6.83 |
| 2vuk | 3.90 | 6.57 | 6.62 | 1is0 | 7.00 | 5.98 | 5.54 |
| 2wor | 3.90 | 5.16 | 5.04 | 1zoh | 7.00 | 6.35 | 5.01 |
| 2wos | 3.90 | 5.99 | 6.13 | 2j7g | 7.00 | 5.84 | 5.82 |
| 3l5b | 3.91 | 4.38 | 4.07 | 3bbb | 7.00 | 4.62 | 4.80 |
| 1pr5 | 3.92 | 5.34 | 5.43 | 3drf | 7.00 | 6.52 | 6.46 |
| 1h5v | 3.93 | 7.38 | 7.57 | 3drg | 7.00 | 9.90 | 9.90 |
| 2a5b | 3.93 | 4.67 | 4.60 | 3dux | 7.00 | 7.08 | 6.93 |
| 3jvk | 3.93 | 3.40 | 3.28 | 3kdm | 7.00 | 7.38 | 7.29 |
| 1z3t | 3.94 | 4.66 | 4.66 | 3l4y | 7.00 | 5.28 | 5.50 |
| 2v3d | 3.94 | 5.88 | 5.77 | 3l8s | 7.00 | 6.82 | 6.51 |
| 3fsj | 3.95 | 8.38 | 8.75 | 3m2u | 7.00 | 6.45 | 6.41 |
| 3kze | 3.95 | 7.30 | 7.12 | 3eou | 7.01 | 6.35 | 6.33 |
| 1x9d | 3.96 | 5.56 | 5.63 | 3nht | 7.01 | 6.95 | 6.83 |
| 2fpz | 3.96 | 5.97 | 5.88 | 2vwl | 7.02 | 7.37 | 7.36 |
| 2wec | 3.96 | 7.12 | 7.09 | 3cdb | 7.02 | 7.73 | 7.91 |
| 3gt9 | 3.96 | 7.24 | 7.29 | 1b1h | 7.03 | 6.90 | 7.32 |
| 3jzg | 3.97 | 4.37 | 4.32 | 2vwm | 7.03 | 7.89 | 7.78 |
| 2g8r | 3.99 | 4.28 | 4.14 | 2aov | 7.04 | 5.06 | 4.76 |
| 1e5j | 4.00 | 6.02 | 6.16 | 1b5i | 7.05 | 6.06 | 6.40 |
| 1lgw | 4.00 | 6.31 | 6.32 | 2bq7 | 7.05 | 7.37 | 7.35 |
| 1nu3 | 4.00 | 4.90 | 4.78 | 2jxr | 7.05 | 8.23 | 8.27 |
| 1tni | 4.00 | 5.74 | 5.72 | 2wer | 7.05 | 5.45 | 5.38 |
| 2buv | 4.00 | 4.99 | 5.01 | 3i4y | 7.05 | 6.15 | 5.96 |
| 2ot1 | 4.00 | 4.98 | 4.95 | 1ui0 | 7.06 | 5.82 | 5.75 |
| 2qrl | 4.00 | 3.92 | 3.77 | 2ate | 7.07 | 5.01 | 5.01 |
| 2rin | 4.00 | 6.00 | 5.99 | 3cl0 | 7.07 | 5.14 | 5.12 |
| 2whp | 4.00 | 6.16 | 6.12 | 1lpg | 7.09 | 7.67 | 7.75 |
| 1c5z | 4.01 | 5.50 | 5.43 | 2bz6 | 7.09 | 6.33 | 6.30 |
| 1v2w | 4.01 | 5.39 | 5.18 | 3f7h | 7.09 | 7.06 | 6.99 |
| 2wvz | 4.02 | 5.52 | 5.36 | 1b32 | 7.10 | 6.41 | 6.89 |
| 2q8m | 4.03 | 5.28 | 5.35 | 2il2 | 7.10 | 8.10 | 8.29 |

|      |      |      |      |      |      |       |       |
|------|------|------|------|------|------|-------|-------|
| 2qrm | 4.03 | 6.15 | 5.97 | 2v57 | 7.10 | 5.59  | 5.57  |
| 3bxh | 4.03 | 5.28 | 5.28 | 2wjg | 7.10 | 5.01  | 5.08  |
| 3nq9 | 4.03 | 3.38 | 3.22 | 3hky | 7.10 | 6.99  | 7.11  |
| 1hi5 | 4.04 | 3.60 | 3.79 | 3e64 | 7.11 | 6.36  | 6.39  |
| 1li2 | 4.04 | 6.26 | 6.16 | 1b05 | 7.12 | 6.27  | 6.64  |
| 2c02 | 4.04 | 3.89 | 3.99 | 1b52 | 7.12 | 5.73  | 6.13  |
| 1r4w | 4.05 | 5.09 | 5.16 | 1nz7 | 7.12 | 6.99  | 6.89  |
| 1toi | 4.05 | 5.35 | 5.26 | 1xd0 | 7.12 | 7.27  | 7.27  |
| 1tuf | 4.05 | 5.10 | 4.91 | 1o3d | 7.13 | 6.55  | 6.51  |
| 2w66 | 4.05 | 6.12 | 6.10 | 2j7d | 7.13 | 6.08  | 6.06  |
| 3fjz | 4.05 | 5.60 | 5.71 | 3gcv | 7.13 | 7.98  | 8.28  |
| 2clh | 4.06 | 6.96 | 6.99 | 2pv1 | 7.14 | 7.73  | 7.59  |
| 2clo | 4.06 | 6.67 | 6.74 | 2vot | 7.14 | 6.31  | 6.16  |
| 8a3h | 4.06 | 6.03 | 5.98 | 3n7o | 7.14 | 8.04  | 8.12  |
| 2v2v | 4.07 | 5.20 | 5.05 | 1elb | 7.15 | 5.59  | 5.99  |
| 1n2v | 4.08 | 4.72 | 4.52 | 1fch | 7.15 | 6.07  | 6.17  |
| 1ai7 | 4.09 | 5.63 | 5.53 | 1pxn | 7.15 | 6.54  | 6.61  |
| 1o0n | 4.09 | 3.98 | 3.88 | 1xr9 | 7.15 | 9.44  | 9.37  |
| 3g2n | 4.09 | 5.87 | 5.70 | 1zog | 7.15 | 6.50  | 5.24  |
| 1c5t | 4.10 | 5.15 | 5.26 | 2fqx | 7.15 | 6.24  | 6.17  |
| 1odj | 4.10 | 5.78 | 5.68 | 2qnn | 7.15 | 10.25 | 10.86 |
| 2bvs | 4.10 | 6.49 | 6.18 | 3fql | 7.15 | 8.02  | 8.14  |
| 3gk1 | 4.10 | 3.94 | 3.85 | 1f0u | 7.16 | 6.70  | 6.71  |
| 3iod | 4.10 | 7.68 | 7.76 | 1g36 | 7.17 | 6.79  | 6.46  |
| 1p19 | 4.11 | 4.73 | 4.62 | 1o2h | 7.17 | 6.59  | 6.54  |
| 1z3v | 4.11 | 4.44 | 4.53 | 2q63 | 7.18 | 8.17  | 8.28  |
| 2exm | 4.11 | 4.56 | 4.61 | 1fcx | 7.19 | 8.44  | 8.39  |
| 3d6o | 4.11 | 4.21 | 3.96 | 1me7 | 7.19 | 5.29  | 5.14  |
| 3oyw | 4.11 | 4.02 | 4.03 | 1me8 | 7.19 | 4.99  | 4.81  |
| 3ivc | 4.12 | 6.86 | 6.84 | 1q7a | 7.19 | 5.48  | 5.37  |
| 3mkn | 4.12 | 5.41 | 5.44 | 2j7h | 7.19 | 5.81  | 6.01  |
| 1v2q | 4.13 | 5.25 | 4.94 | 2pqb | 7.20 | 6.68  | 6.82  |
| 2toh | 4.15 | 4.19 | 4.11 | 3c79 | 7.20 | 5.74  | 5.59  |
| 2v2q | 4.15 | 5.36 | 5.23 | 3mz6 | 7.20 | 4.31  | 4.03  |
| 2vt3 | 4.15 | 4.20 | 4.39 | 1gvx | 7.22 | 8.69  | 8.46  |
| 1v2s | 4.17 | 5.86 | 5.74 | 1sw2 | 7.22 | 6.09  | 6.02  |
| 2qfu | 4.18 | 5.46 | 5.60 | 2epn | 7.22 | 6.14  | 6.16  |
| 1hi3 | 4.19 | 3.06 | 3.27 | 2er6 | 7.22 | 8.45  | 8.46  |
| 3cft | 4.19 | 5.26 | 5.23 | 2h6t | 7.22 | 6.92  | 6.93  |
| 3f3a | 4.19 | 4.64 | 4.56 | 3cyz | 7.22 | 4.27  | 4.08  |
| 1c5y | 4.20 | 5.79 | 5.86 | 3dzt | 7.22 | 6.76  | 6.78  |
| 1c87 | 4.20 | 6.22 | 6.19 | 3k99 | 7.22 | 6.13  | 5.97  |
| 1ghw | 4.20 | 5.89 | 5.87 | 3m35 | 7.22 | 6.67  | 7.24  |
| 3djp | 4.20 | 4.15 | 3.95 | 3pcj | 7.22 | 5.10  | 4.97  |
| 1odi | 4.21 | 5.86 | 5.96 | 1g2l | 7.24 | 7.16  | 6.90  |

|      |      |      |      |      |      |      |      |
|------|------|------|------|------|------|------|------|
| 1yon | 4.21 | 5.41 | 5.71 | 1oyt | 7.24 | 6.88 | 6.93 |
| 2qmj | 4.21 | 5.65 | 5.64 | 1y4z | 7.24 | 5.20 | 4.76 |
| 1kv5 | 4.22 | 4.98 | 5.02 | 2psv | 7.24 | 7.29 | 7.14 |
| 1pzi | 4.22 | 4.13 | 4.17 | 3ikg | 7.24 | 6.31 | 6.25 |
| 1ua4 | 4.22 | 5.24 | 5.27 | 3n3g | 7.24 | 5.20 | 5.45 |
| 3kyq | 4.22 | 4.37 | 4.41 | 3o84 | 7.24 | 5.85 | 5.86 |
| 2jke | 4.23 | 5.84 | 5.80 | 1jet | 7.25 | 5.87 | 6.30 |
| 2jkp | 4.23 | 6.23 | 6.25 | 2ces | 7.25 | 6.32 | 6.33 |
| 2bes | 4.24 | 4.96 | 4.96 | 2ole | 7.25 | 5.87 | 6.30 |
| 3h78 | 4.24 | 5.52 | 5.47 | 2qbw | 7.25 | 9.16 | 8.89 |
| 1li3 | 4.25 | 5.82 | 5.68 | 3gcs | 7.25 | 7.95 | 8.03 |
| 2qrk | 4.26 | 4.34 | 4.48 | 1dhi | 7.26 | 4.91 | 5.01 |
| 3lk1 | 4.26 | 2.68 | 2.60 | 1mrx | 7.26 | 7.84 | 7.83 |
| 1m5w | 4.27 | 4.89 | 5.00 | 2qzr | 7.26 | 6.44 | 6.35 |
| 3ijg | 4.27 | 4.90 | 4.95 | 3cz1 | 7.26 | 5.16 | 5.13 |
| 2vzr | 4.28 | 3.93 | 3.83 | 3gc5 | 7.26 | 6.43 | 6.64 |
| 3f5j | 4.28 | 6.25 | 6.21 | 3ifo | 7.26 | 7.14 | 6.89 |
| 3gta | 4.28 | 7.48 | 7.37 | 1fdq | 7.27 | 5.87 | 5.51 |
| 3jrs | 4.28 | 4.93 | 4.85 | 1b40 | 7.28 | 6.92 | 7.30 |
| 1e2l | 4.29 | 6.17 | 6.02 | 1hii | 7.28 | 7.84 | 7.62 |
| 1v2l | 4.29 | 5.68 | 5.51 | 1kel | 7.28 | 5.68 | 5.49 |
| 2wuf | 4.29 | 6.03 | 5.85 | 2ceq | 7.28 | 6.56 | 6.52 |
| 1a30 | 4.30 | 5.05 | 5.00 | 2cgr | 7.28 | 6.44 | 6.43 |
| 1amk | 4.30 | 4.95 | 5.01 | 2pql | 7.28 | 6.58 | 6.72 |
| 1det | 4.30 | 3.66 | 3.63 | 2qhz | 7.28 | 8.45 | 9.13 |
| 1w3k | 4.30 | 5.68 | 5.62 | 3a6t | 7.28 | 5.08 | 5.05 |
| 2cli | 4.30 | 6.37 | 6.68 | 3fl5 | 7.28 | 6.71 | 6.74 |
| 2cll | 4.30 | 6.63 | 6.85 | 3ccz | 7.29 | 6.45 | 6.49 |
| 3ivg | 4.30 | 7.33 | 7.32 | 1o3h | 7.30 | 5.97 | 5.63 |
| 3obu | 4.30 | 7.67 | 7.41 | 1o3i | 7.30 | 6.05 | 5.71 |
| 1ajq | 4.31 | 6.09 | 6.06 | 1swl | 7.30 | 6.53 | 6.42 |
| 2tpi | 4.31 | 5.72 | 5.74 | 2i3i | 7.30 | 6.83 | 6.86 |
| 2ha6 | 4.32 | 5.12 | 5.05 | 2qi1 | 7.30 | 8.49 | 8.71 |
| 2qtt | 4.32 | 6.04 | 6.04 | 2uxi | 7.30 | 4.85 | 4.78 |
| 4rsk | 4.32 | 4.17 | 4.09 | 3p5o | 7.30 | 6.11 | 5.92 |
| 3l7a | 4.33 | 7.18 | 7.10 | 3mxf | 7.31 | 6.36 | 6.20 |
| 1e3v | 4.34 | 6.21 | 6.03 | 1xh6 | 7.32 | 9.02 | 9.03 |
| 1z6s | 4.34 | 4.22 | 4.31 | 1ydt | 7.32 | 7.24 | 7.14 |
| 2ha5 | 4.34 | 4.36 | 4.42 | 2j7e | 7.32 | 6.15 | 6.07 |
| 1ghv | 4.35 | 5.29 | 5.36 | 3ipu | 7.32 | 7.01 | 7.20 |
| 1sv3 | 4.35 | 4.70 | 4.56 | 2j2u | 7.33 | 7.17 | 7.03 |
| 1dy4 | 4.36 | 6.30 | 6.38 | 2r2m | 7.33 | 6.65 | 6.58 |
| 1td7 | 4.37 | 5.04 | 5.27 | 1uw6 | 7.34 | 6.19 | 6.11 |
| 2jdy | 4.37 | 4.41 | 4.42 | 2fgi | 7.34 | 6.19 | 6.52 |
| 2zif | 4.37 | 5.62 | 5.82 | 2gv6 | 7.34 | 6.88 | 6.54 |

|      |      |      |      |      |      |      |      |
|------|------|------|------|------|------|------|------|
| 1bhf | 4.38 | 5.76 | 5.39 | 3f7i | 7.34 | 6.81 | 6.81 |
| 2avq | 4.39 | 7.45 | 7.41 | 1mhw | 7.35 | 8.25 | 7.88 |
| 2hjb | 4.39 | 6.05 | 6.06 | 1qkb | 7.35 | 6.35 | 6.70 |
| 3djo | 4.39 | 4.25 | 4.17 | 1swg | 7.36 | 5.94 | 5.89 |
| 1p57 | 4.40 | 5.48 | 5.43 | 1b51 | 7.37 | 5.63 | 6.03 |
| 2i2e | 4.40 | 5.20 | 5.54 | 1fao | 7.37 | 4.45 | 4.61 |
| 2pwd | 4.40 | 6.12 | 6.17 | 3dp4 | 7.37 | 5.56 | 5.60 |
| 1no6 | 4.41 | 5.96 | 5.80 | 3f7g | 7.37 | 6.33 | 6.30 |
| 2csn | 4.41 | 5.36 | 5.51 | 1bxq | 7.38 | 7.39 | 7.45 |
| 3iqi | 4.41 | 4.19 | 4.07 | 2qi0 | 7.38 | 8.91 | 9.23 |
| 3dri | 4.42 | 3.87 | 3.70 | 1d3p | 7.39 | 7.76 | 7.70 |
| 2pu2 | 4.43 | 5.32 | 5.09 | 1b55 | 7.40 | 4.82 | 5.09 |
| 3okc | 4.44 | 4.08 | 4.19 | 1drj | 7.40 | 6.26 | 6.26 |
| 3pd3 | 4.44 | 5.57 | 5.88 | 1k1m | 7.40 | 7.15 | 7.01 |
| 2r2w | 4.47 | 6.31 | 6.12 | 1oar | 7.40 | 6.29 | 6.41 |
| 3hec | 4.47 | 7.86 | 8.13 | 1owh | 7.40 | 5.87 | 5.87 |
| 1qan | 4.48 | 6.25 | 6.52 | 1r6n | 7.40 | 6.99 | 6.72 |
| 2ogy | 4.48 | 5.43 | 5.23 | 2bpy | 7.40 | 8.00 | 7.92 |
| 3pd4 | 4.48 | 5.36 | 5.52 | 2er9 | 7.40 | 9.27 | 9.03 |
| 1hi4 | 4.49 | 4.69 | 4.87 | 2i3h | 7.40 | 5.86 | 5.85 |
| 1j14 | 4.49 | 6.05 | 5.94 | 2zy1 | 7.40 | 6.30 | 6.23 |
| 3f9y | 4.49 | 7.94 | 8.10 | 1ik4 | 7.41 | 5.25 | 5.21 |
| 3hl8 | 4.49 | 4.99 | 4.89 | 1q5k | 7.42 | 5.26 | 5.25 |
| 3kmy | 4.49 | 5.24 | 5.02 | 1t32 | 7.42 | 9.20 | 8.71 |
| 1gi7 | 4.51 | 5.00 | 5.09 | 1b5j | 7.43 | 6.23 | 6.60 |
| 2r1y | 4.51 | 4.09 | 4.00 | 2bak | 7.43 | 7.87 | 8.18 |
| 1gu1 | 4.52 | 5.89 | 5.88 | 1qb9 | 7.44 | 7.18 | 7.06 |
| 2a4m | 4.52 | 5.17 | 5.32 | 1vzq | 7.44 | 7.24 | 7.14 |
| 2ra6 | 4.52 | 6.15 | 6.03 | 2oxn | 7.44 | 4.58 | 4.52 |
| 2wm0 | 4.52 | 7.08 | 7.09 | 2qbq | 7.44 | 6.89 | 6.40 |
| 3bzf | 4.52 | 8.87 | 8.81 | 2r38 | 7.44 | 9.44 | 9.48 |
| 3gy7 | 4.52 | 5.78 | 5.75 | 2vx9 | 7.44 | 4.64 | 4.45 |
| 3h30 | 4.53 | 4.74 | 4.41 | 3lbl | 7.44 | 6.92 | 6.74 |
| 1amw | 4.54 | 4.32 | 4.50 | 1n0s | 7.45 | 7.06 | 6.99 |
| 1b2h | 4.54 | 5.94 | 6.44 | 1sqo | 7.46 | 5.96 | 5.99 |
| 1lyx | 4.54 | 4.65 | 4.73 | 2g71 | 7.46 | 7.78 | 8.30 |
| 1oko | 4.54 | 4.44 | 4.48 | 3kyg | 7.46 | 3.49 | 3.50 |
| 1szd | 4.54 | 5.55 | 5.83 | 1xh4 | 7.47 | 8.67 | 8.74 |
| 2w5i | 4.54 | 4.03 | 4.43 | 5tmp | 7.47 | 6.78 | 7.23 |
| 2zz1 | 4.54 | 5.90 | 5.85 | 1iiq | 7.48 | 8.56 | 8.55 |
| 3iub | 4.54 | 6.09 | 6.16 | 2qhy | 7.48 | 8.45 | 8.80 |
| 1utc | 4.55 | 7.45 | 7.45 | 2qwe | 7.48 | 5.33 | 5.24 |
| 3b2q | 4.55 | 5.53 | 5.77 | 3o6m | 7.48 | 8.77 | 8.77 |
| 3djv | 4.55 | 4.34 | 4.36 | 2hhn | 7.49 | 7.11 | 7.59 |
| 3p8p | 4.55 | 6.27 | 6.33 | 3nyx | 7.49 | 7.62 | 7.86 |

|      |      |      |      |      |      |       |       |
|------|------|------|------|------|------|-------|-------|
| 1w2g | 4.57 | 5.76 | 5.63 | 2vwo | 7.51 | 7.60  | 7.59  |
| 1bma | 4.59 | 7.16 | 7.29 | 1lah | 7.52 | 5.87  | 6.08  |
| 1fj4 | 4.59 | 6.00 | 5.94 | 1lf2 | 7.52 | 8.04  | 8.01  |
| 1l2s | 4.59 | 5.28 | 5.22 | 1lke | 7.52 | 7.94  | 7.82  |
| 2ihj | 4.59 | 6.61 | 6.53 | 2gek | 7.52 | 4.64  | 4.67  |
| 2jiw | 4.59 | 6.36 | 6.44 | 2mas | 7.52 | 5.91  | 5.93  |
| 3f3t | 4.59 | 7.03 | 6.93 | 3ekr | 7.52 | 5.98  | 5.87  |
| 3hp9 | 4.59 | 5.36 | 5.55 | 3hfb | 7.52 | 6.42  | 6.65  |
| 3iqh | 4.59 | 4.21 | 4.20 | 3hmo | 7.52 | 6.99  | 7.16  |
| 1pa9 | 4.60 | 5.71 | 5.71 | 3l4u | 7.52 | 5.29  | 5.36  |
| 1tx7 | 4.60 | 5.25 | 5.18 | 2e7l | 7.54 | 11.50 | 11.50 |
| 1u33 | 4.60 | 5.83 | 5.73 | 2f1g | 7.54 | 6.57  | 6.56  |
| 1upf | 4.60 | 3.86 | 3.79 | 1k1j | 7.55 | 7.07  | 7.02  |
| 2v54 | 4.60 | 6.16 | 6.17 | 1lpk | 7.55 | 7.10  | 7.05  |
| 2vb8 | 4.60 | 5.85 | 5.83 | 1v0l | 7.55 | 5.63  | 5.65  |
| 2vba | 4.60 | 6.17 | 6.07 | 1vj9 | 7.55 | 7.14  | 7.06  |
| 2wlz | 4.60 | 6.11 | 6.10 | 3b50 | 7.55 | 5.04  | 4.92  |
| 2x0y | 4.60 | 5.63 | 5.53 | 3cct | 7.56 | 7.60  | 7.52  |
| 3d7k | 4.60 | 7.79 | 8.23 | 1a0q | 7.57 | 5.74  | 5.77  |
| 3iqg | 4.60 | 5.46 | 5.29 | 1d09 | 7.57 | 5.72  | 5.63  |
| 2bo4 | 4.61 | 3.46 | 3.43 | 1m13 | 7.57 | 7.94  | 7.61  |
| 3lgs | 4.61 | 5.95 | 6.03 | 1q95 | 7.57 | 5.64  | 5.56  |
| 1f4f | 4.62 | 5.32 | 5.05 | 1qhc | 7.57 | 5.56  | 5.89  |
| 1ofz | 4.62 | 4.12 | 4.07 | 2avs | 7.57 | 8.64  | 8.67  |
| 2a5c | 4.62 | 4.54 | 4.57 | 2pyn | 7.57 | 7.94  | 8.03  |
| 2f6t | 4.62 | 6.05 | 5.93 | 3cd0 | 7.57 | 7.01  | 7.04  |
| 3f5k | 4.62 | 6.65 | 6.60 | 3ipq | 7.57 | 9.99  | 10.12 |
| 2w87 | 4.65 | 3.87 | 3.91 | 3cda | 7.58 | 7.79  | 7.95  |
| 1bjz | 4.66 | 6.26 | 6.35 | 2fdp | 7.59 | 8.46  | 8.68  |
| 1h4w | 4.66 | 5.83 | 5.75 | 2xb8 | 7.59 | 6.89  | 6.76  |
| 2ca8 | 4.66 | 5.31 | 5.25 | 1lpz | 7.60 | 7.32  | 7.08  |
| 2ha2 | 4.66 | 5.20 | 5.17 | 2zmm | 7.60 | 6.57  | 6.11  |
| 3mss | 4.66 | 4.90 | 4.96 | 3gc4 | 7.60 | 7.48  | 7.48  |
| 2nsl | 4.68 | 5.44 | 5.34 | 3iph | 7.60 | 7.39  | 7.32  |
| 2uy4 | 4.68 | 4.36 | 4.46 | 3liw | 7.60 | 8.04  | 7.81  |
| 3g35 | 4.68 | 6.03 | 5.94 | 1ftm | 7.61 | 5.76  | 5.78  |
| 1c5n | 4.70 | 5.77 | 6.64 | 1fzq | 7.62 | 5.37  | 5.24  |
| 1c86 | 4.70 | 6.68 | 6.53 | 2aoe | 7.62 | 8.15  | 8.02  |
| 2cex | 4.70 | 4.60 | 4.35 | 2p3c | 7.62 | 9.84  | 9.76  |
| 2i2c | 4.70 | 5.80 | 6.12 | 2psu | 7.62 | 7.71  | 7.65  |
| 2j9n | 4.70 | 6.10 | 6.04 | 2pvl | 7.62 | 5.73  | 5.83  |
| 2qfo | 4.70 | 4.06 | 4.34 | 3be9 | 7.62 | 6.01  | 6.16  |
| 3kiv | 4.70 | 4.83 | 4.93 | 2xba | 7.63 | 6.54  | 6.33  |
| 1v2t | 4.71 | 5.18 | 4.96 | 1uvt | 7.64 | 6.65  | 6.73  |
| 2qrh | 4.71 | 5.99 | 5.91 | 3d78 | 7.64 | 5.62  | 5.61  |



|      |      |      |      |      |      |       |       |
|------|------|------|------|------|------|-------|-------|
| 1vso | 4.72 | 4.67 | 4.79 | 3fat | 7.64 | 5.81  | 5.89  |
| 2o1c | 4.72 | 3.70 | 3.93 | 3h89 | 7.64 | 10.63 | 10.06 |
| 3b9g | 4.72 | 5.48 | 5.41 | 3hl7 | 7.64 | 6.17  | 6.02  |
| 3oka | 4.72 | 3.96 | 4.23 | 3k5k | 7.64 | 7.08  | 7.30  |
| 3okp | 4.72 | 4.68 | 4.85 | 1f0r | 7.66 | 6.87  | 6.99  |
| 1v2o | 4.73 | 5.27 | 5.07 | 1i8i | 7.66 | 7.12  | 7.26  |
| 1ce5 | 4.74 | 6.07 | 5.92 | 1nny | 7.66 | 8.32  | 7.99  |
| 1w4p | 4.74 | 4.37 | 4.27 | 1ppk | 7.66 | 6.67  | 6.58  |
| 2e2p | 4.74 | 4.75 | 4.92 | 2cn0 | 7.66 | 7.49  | 7.77  |
| 2ov4 | 4.74 | 6.33 | 6.73 | 2bpv | 7.67 | 7.74  | 7.77  |
| 2uxu | 4.74 | 4.71 | 4.62 | 1o2q | 7.68 | 6.79  | 6.73  |
| 3f3u | 4.74 | 6.29 | 6.27 | 1t4v | 7.68 | 6.04  | 5.79  |
| 3lcv | 4.74 | 6.54 | 6.96 | 1w0z | 7.68 | 5.98  | 5.92  |
| 3g2j | 4.75 | 5.36 | 5.30 | 2arm | 7.68 | 5.41  | 5.43  |
| 1q8t | 4.76 | 5.64 | 5.67 | 3eig | 7.68 | 6.18  | 6.31  |
| 3acw | 4.76 | 7.02 | 7.08 | 3f8c | 7.68 | 6.66  | 6.78  |
| 1str | 4.77 | 6.06 | 5.87 | 3miy | 7.68 | 6.19  | 6.09  |
| 2b4l | 4.77 | 5.45 | 5.42 | 2itk | 7.69 | 6.41  | 6.11  |
| 3iqu | 4.77 | 5.10 | 4.86 | 1bai | 7.70 | 8.18  | 7.96  |
| 1oss | 4.79 | 5.62 | 5.48 | 1fzm | 7.70 | 8.88  | 8.82  |
| 2nsj | 4.79 | 5.40 | 5.37 | 1gno | 7.70 | 6.94  | 6.68  |
| 3eb1 | 4.79 | 5.13 | 4.74 | lizh | 7.70 | 8.98  | 8.93  |
| 3g2k | 4.79 | 7.08 | 6.99 | 1mes | 7.70 | 8.70  | 8.61  |
| 1bju | 4.80 | 5.68 | 5.50 | 1oau | 7.70 | 5.17  | 5.00  |
| 2nta | 4.80 | 6.62 | 6.47 | 1oz0 | 7.70 | 7.67  | 7.30  |
| 3dnd | 4.80 | 5.89 | 5.85 | 1s39 | 7.70 | 6.44  | 6.33  |
| 1aid | 4.82 | 6.89 | 7.06 | 1uou | 7.70 | 5.84  | 5.63  |
| 1dud | 4.82 | 5.10 | 5.04 | 1vja | 7.70 | 6.67  | 6.56  |
| 1v1j | 4.82 | 5.77 | 5.80 | 2psj | 7.70 | 5.99  | 5.96  |
| 1xff | 4.82 | 5.68 | 5.77 | 2zjw | 7.70 | 5.00  | 5.04  |
| 1y3p | 4.82 | 6.29 | 6.14 | 3g0e | 7.70 | 6.71  | 6.61  |
| 2gl0 | 4.82 | 4.96 | 5.08 | 3i51 | 7.70 | 6.26  | 6.08  |
| 2pwg | 4.82 | 6.32 | 6.27 | 4tmk | 7.70 | 6.95  | 7.30  |
| 2ypi | 4.82 | 4.77 | 4.82 | 1ajv | 7.72 | 9.04  | 9.18  |
| 3kmx | 4.82 | 5.74 | 5.58 | 1j4r | 7.72 | 7.47  | 7.63  |
| 3lxo | 4.82 | 4.13 | 4.02 | 1oif | 7.72 | 6.09  | 6.08  |
| 3a1t | 4.83 | 4.65 | 4.55 | 3h8c | 7.72 | 8.17  | 7.86  |
| 1c83 | 4.85 | 6.34 | 6.32 | 2aou | 7.73 | 6.68  | 6.59  |
| 1ecv | 4.85 | 6.41 | 7.14 | 1f0s | 7.74 | 6.69  | 6.92  |
| 1vkj | 4.85 | 5.93 | 6.00 | 1lee | 7.74 | 8.07  | 8.08  |
| 1xgi | 4.85 | 5.19 | 5.23 | 1nfu | 7.74 | 7.42  | 7.29  |
| 2qwd | 4.85 | 4.33 | 4.49 | 1qbo | 7.74 | 6.66  | 6.58  |
| 2r9x | 4.85 | 5.43 | 5.25 | 1qiw | 7.74 | 6.99  | 7.10  |
| 2w4x | 4.85 | 4.92 | 4.84 | 1rd4 | 7.74 | 7.68  | 7.44  |
| 2ww2 | 4.85 | 5.06 | 4.99 | 1sbg | 7.74 | 7.62  | 7.57  |

|      |      |      |      |      |      |      |      |
|------|------|------|------|------|------|------|------|
| 3cj2 | 4.85 | 5.26 | 4.75 | 2zpk | 7.76 | 6.87 | 6.71 |
| 3f70 | 4.85 | 3.97 | 4.11 | 1xh9 | 7.77 | 8.54 | 8.59 |
| 2brb | 4.86 | 5.73 | 5.87 | 2g70 | 7.77 | 6.42 | 6.31 |
| 3g2i | 4.86 | 5.23 | 5.20 | 2jh6 | 7.77 | 6.81 | 6.75 |
| 3iw8 | 4.87 | 6.88 | 7.09 | 2qm9 | 7.77 | 7.35 | 7.45 |
| 1p1q | 4.89 | 5.49 | 5.57 | 3cyw | 7.77 | 7.83 | 7.94 |
| 2aoc | 4.89 | 7.57 | 7.42 | 3dsz | 7.77 | 5.84 | 6.04 |
| 2j77 | 4.89 | 6.13 | 6.24 | 3gm0 | 7.77 | 6.19 | 6.21 |
| 2vo5 | 4.89 | 6.42 | 6.48 | 3mi2 | 7.77 | 5.83 | 5.81 |
| 3m8u | 4.89 | 7.31 | 7.42 | 2zwz | 7.79 | 6.38 | 6.61 |
| 3juq | 4.91 | 5.75 | 5.43 | 1u1b | 7.80 | 5.20 | 5.51 |
| 1bzc | 4.92 | 6.48 | 6.51 | 1v48 | 7.80 | 6.13 | 6.29 |
| 1e1v | 4.92 | 5.58 | 5.63 | 1x8t | 7.80 | 6.63 | 6.51 |
| 1h1p | 4.92 | 5.02 | 5.01 | 2ra0 | 7.80 | 7.61 | 7.65 |
| 1jqy | 4.92 | 5.34 | 5.26 | 2wl0 | 7.80 | 9.11 | 9.07 |
| 3eax | 4.92 | 6.91 | 6.22 | 3agl | 7.80 | 7.85 | 7.59 |
| 3iqj | 4.93 | 6.17 | 5.89 | 1b6h | 7.82 | 6.12 | 6.54 |
| 1e2k | 4.94 | 6.24 | 6.02 | 1nf8 | 7.82 | 5.82 | 5.77 |
| 2gss | 4.94 | 4.19 | 3.92 | 1njs | 7.82 | 6.59 | 6.76 |
| 2vo4 | 4.94 | 4.38 | 4.34 | 1nvs | 7.82 | 7.70 | 7.63 |
| 2vpe | 4.94 | 5.54 | 5.59 | 2cf9 | 7.82 | 7.33 | 7.23 |
| 4ts1 | 4.94 | 5.54 | 5.60 | 2j34 | 7.82 | 7.32 | 7.23 |
| 1jn4 | 4.95 | 5.62 | 5.78 | 2jg0 | 7.82 | 7.81 | 7.83 |
| 1cea | 4.96 | 4.99 | 5.08 | 2o4n | 7.82 | 8.71 | 9.11 |
| 1elr | 4.96 | 5.95 | 5.67 | 2xbx | 7.82 | 7.96 | 7.86 |
| 1o5g | 4.96 | 6.76 | 6.85 | 2xjg | 7.82 | 6.17 | 6.15 |
| 1tsy | 4.96 | 5.28 | 5.24 | 3gcp | 7.82 | 7.27 | 7.53 |
| 1uz8 | 4.96 | 5.11 | 5.13 | 3mj1 | 7.82 | 6.25 | 6.06 |
| 2vjx | 4.96 | 6.04 | 5.95 | 3cd7 | 7.84 | 7.60 | 7.75 |
| 2w67 | 4.96 | 6.06 | 6.13 | 1a94 | 7.85 | 8.11 | 8.09 |
| 3bxg | 4.96 | 5.53 | 5.54 | 1jwt | 7.85 | 6.96 | 6.79 |
| 3lbj | 4.96 | 7.53 | 7.35 | 1laf | 7.85 | 5.92 | 6.06 |
| 2w47 | 4.98 | 2.94 | 2.82 | 1lbf | 7.85 | 6.15 | 6.14 |
| 3hrf | 4.99 | 6.36 | 6.13 | 1lst | 7.85 | 5.96 | 6.23 |
| 1byk | 5.00 | 5.82 | 5.95 | 2fle | 7.85 | 8.87 | 8.79 |
| 1c84 | 5.00 | 6.51 | 6.39 | 2gv7 | 7.85 | 8.61 | 8.09 |
| 1nc3 | 5.00 | 6.15 | 6.14 | 3c84 | 7.85 | 6.69 | 6.67 |
| 1ql7 | 5.00 | 7.66 | 7.53 | 3ccw | 7.87 | 6.68 | 6.64 |
| 1sts | 5.00 | 6.59 | 6.51 | 1fzo | 7.89 | 9.31 | 9.23 |
| 2oym | 5.00 | 5.61 | 5.67 | 1gj7 | 7.89 | 7.00 | 6.86 |
| 2vxn | 5.00 | 4.75 | 4.81 | 1h2t | 7.89 | 6.61 | 6.82 |
| 3cfn | 5.00 | 6.22 | 6.28 | 2zn7 | 7.89 | 7.32 | 6.70 |
| 3dkg | 5.00 | 6.37 | 6.34 | 3hig | 7.89 | 6.24 | 6.14 |
| 3dvp | 5.00 | 7.02 | 6.77 | 3cd5 | 7.90 | 7.34 | 7.13 |
| 3gbe | 5.00 | 6.05 | 6.08 | 1ajx | 7.91 | 8.75 | 8.65 |

|      |      |      |      |      |      |      |      |
|------|------|------|------|------|------|------|------|
| 3k02 | 5.00 | 7.55 | 7.51 | 1b6j | 7.92 | 7.90 | 7.81 |
| 1ppi | 5.01 | 6.96 | 7.26 | 2jjb | 7.92 | 6.93 | 6.84 |
| 2glp | 5.01 | 6.69 | 6.05 | 3d7z | 7.92 | 8.03 | 7.80 |
| 3ads | 5.01 | 5.98 | 5.69 | 3hv7 | 7.92 | 7.39 | 7.41 |
| 2d0k | 5.02 | 5.26 | 5.17 | 2ewa | 7.94 | 7.44 | 7.48 |
| 3bgc | 5.02 | 8.78 | 9.03 | 1epo | 7.96 | 8.66 | 8.58 |
| 2qt5 | 5.03 | 4.74 | 4.69 | 1g2k | 7.96 | 9.05 | 9.06 |
| 1mfa | 5.04 | 4.48 | 4.43 | 1hvh | 7.96 | 7.98 | 8.13 |
| 1qxk | 5.05 | 6.59 | 6.37 | 1o3f | 7.96 | 6.51 | 6.60 |
| 3f68 | 5.06 | 7.42 | 6.97 | 2p3a | 7.96 | 9.48 | 9.42 |
| 2c3l | 5.07 | 6.16 | 6.16 | 2qe4 | 7.96 | 6.81 | 6.77 |
| 3juo | 5.07 | 6.10 | 5.72 | 3a5y | 7.96 | 6.16 | 6.65 |
| 1enu | 5.08 | 5.13 | 5.04 | 3bgq | 7.96 | 6.37 | 6.44 |
| 2qtg | 5.08 | 6.05 | 6.21 | 3g5d | 7.96 | 6.92 | 6.93 |
| 1m48 | 5.09 | 6.52 | 6.34 | 3iok | 7.96 | 6.24 | 6.39 |
| 1nw7 | 5.09 | 5.13 | 5.29 | 1a4k | 8.00 | 5.41 | 5.18 |
| 1kmy | 5.10 | 6.09 | 6.03 | 1apw | 8.00 | 6.84 | 6.79 |
| 1od8 | 5.10 | 5.70 | 5.63 | 1fkg | 8.00 | 6.74 | 6.53 |
| 1onz | 5.10 | 5.89 | 5.57 | 1gaf | 8.00 | 5.79 | 5.69 |
| 1v0k | 5.10 | 5.41 | 5.49 | 1gai | 8.00 | 6.59 | 6.56 |
| 1w7g | 5.10 | 6.38 | 6.59 | 1r0p | 8.00 | 8.07 | 8.10 |
| 2qrq | 5.10 | 5.83 | 5.75 | 1tkb | 8.00 | 6.37 | 6.59 |
| 2r9w | 5.10 | 5.73 | 5.65 | 1vyg | 8.00 | 6.64 | 6.52 |
| 3gy4 | 5.10 | 5.27 | 5.13 | 2hah | 8.00 | 6.63 | 6.53 |
| 1k4h | 5.11 | 5.58 | 5.59 | 2vnt | 8.00 | 6.26 | 6.10 |
| 2h6q | 5.11 | 5.90 | 5.83 | 2vwn | 8.00 | 7.35 | 7.36 |
| 3k4d | 5.11 | 5.68 | 5.59 | 2xbw | 8.00 | 8.04 | 7.84 |
| 1qaw | 5.12 | 6.20 | 6.29 | 2z8e | 8.00 | 3.95 | 3.87 |
| 1uv6 | 5.12 | 5.55 | 5.43 | 3cyx | 8.00 | 8.46 | 8.68 |
| 2web | 5.12 | 7.52 | 7.71 | 3e92 | 8.00 | 7.81 | 7.69 |
| 3nkx | 5.12 | 7.11 | 6.76 | 3fur | 8.00 | 7.87 | 7.67 |
| 2brl | 5.14 | 5.55 | 5.64 | 3gkz | 8.00 | 6.46 | 6.43 |
| 1jcx | 5.15 | 5.13 | 5.07 | 3hx3 | 8.00 | 6.09 | 5.97 |
| 1o0m | 5.15 | 4.61 | 4.52 | 3k97 | 8.00 | 6.01 | 5.78 |
| 1pb8 | 5.15 | 5.76 | 5.91 | 1b7h | 8.02 | 6.09 | 6.55 |
| 1s38 | 5.15 | 6.42 | 6.26 | 2cet | 8.02 | 6.76 | 6.62 |
| 1thz | 5.15 | 5.71 | 5.60 | 1hih | 8.05 | 7.66 | 7.51 |
| 1jqd | 5.16 | 5.15 | 5.41 | 1vyf | 8.05 | 5.52 | 5.33 |
| 3lqi | 5.16 | 6.27 | 6.44 | 2bqv | 8.05 | 8.43 | 8.17 |
| 2f5t | 5.17 | 6.30 | 6.17 | 2jkh | 8.05 | 7.06 | 7.00 |
| 2zfp | 5.17 | 6.02 | 5.90 | 2xc4 | 8.05 | 7.86 | 8.06 |
| 3b7j | 5.17 | 4.83 | 4.74 | 3ag9 | 8.05 | 6.76 | 6.61 |
| 2qrg | 5.18 | 6.20 | 6.07 | 1gni | 8.07 | 5.73 | 5.57 |
| 3iqv | 5.18 | 5.00 | 4.80 | 1siv | 8.08 | 7.10 | 7.21 |
| 1ocq | 5.19 | 5.68 | 5.76 | 3ifl | 8.08 | 6.77 | 6.57 |

|      |      |      |       |      |      |       |       |
|------|------|------|-------|------|------|-------|-------|
| logg | 5.19 | 6.17 | 6.16  | 2rkg | 8.09 | 8.10  | 8.14  |
| loxr | 5.19 | 4.27 | 4.15  | 3hub | 8.09 | 7.60  | 7.47  |
| lrnt | 5.19 | 4.87 | 4.73  | 3kqe | 8.09 | 8.52  | 8.46  |
| lnw5 | 5.21 | 6.00 | 6.30  | 1erb | 8.10 | 6.60  | 6.44  |
| 3b2t | 5.21 | 3.87 | 4.21  | 1fzj | 8.10 | 8.75  | 8.47  |
| 3ilq | 5.21 | 8.39 | 8.47  | 1l6m | 8.10 | 3.72  | 3.57  |
| 1bq4 | 5.22 | 3.99 | 3.74  | 1ody | 8.10 | 9.33  | 9.29  |
| 1gjd | 5.22 | 6.70 | 7.29  | 1stc | 8.10 | 8.23  | 8.37  |
| 1j17 | 5.22 | 8.04 | 7.89  | 2cf8 | 8.10 | 7.54  | 7.44  |
| 1o5c | 5.22 | 6.24 | 6.31  | 2pvj | 8.10 | 6.08  | 6.03  |
| 1ucn | 5.22 | 4.48 | 4.82  | 2vvu | 8.10 | 7.48  | 7.44  |
| 1w4o | 5.22 | 4.80 | 4.55  | 3kr8 | 8.10 | 7.06  | 7.48  |
| 1zea | 5.22 | 6.51 | 6.31  | 1nvr | 8.11 | 7.79  | 7.98  |
| 2gz2 | 5.22 | 4.44 | 4.54  | 2pq9 | 8.11 | 7.19  | 7.25  |
| 2hxm | 5.22 | 5.42 | 5.20  | 1g35 | 8.14 | 8.95  | 8.99  |
| 2wzm | 5.22 | 5.86 | 6.04  | 1yqj | 8.14 | 8.03  | 8.33  |
| 2zxd | 5.22 | 6.13 | 6.17  | 3odu | 8.14 | 6.78  | 6.83  |
| 3dne | 5.22 | 6.35 | 6.30  | 1fkh | 8.15 | 7.07  | 6.99  |
| 3ms9 | 5.22 | 5.49 | 5.30  | 1w5v | 8.15 | 10.48 | 10.32 |
| 1b4z | 5.23 | 5.91 | 6.27  | 2fxu | 8.15 | 8.14  | 8.10  |
| 3lc3 | 5.23 | 5.88 | 5.96  | 2jf4 | 8.15 | 7.16  | 7.22  |
| 1fh7 | 5.24 | 5.91 | 5.89  | 3bu1 | 8.15 | 4.75  | 4.78  |
| 1q8w | 5.24 | 6.10 | 6.16  | 3i4b | 8.15 | 7.17  | 7.34  |
| 1s89 | 5.24 | 4.96 | 5.06  | 3g08 | 8.16 | 8.44  | 8.38  |
| 2jfz | 5.24 | 6.85 | 6.74  | 2f80 | 8.18 | 8.03  | 7.97  |
| 2bfr | 5.25 | 5.09 | 5.25  | 2v59 | 8.19 | 5.04  | 5.27  |
| 1w4q | 5.26 | 4.93 | 4.92  | 3hit | 8.19 | 6.66  | 7.05  |
| 2qft | 5.26 | 5.52 | 5.62  | 3hpt | 8.19 | 7.05  | 6.98  |
| 1qca | 5.27 | 7.62 | 7.59  | 2jds | 8.20 | 6.85  | 6.95  |
| 1b46 | 5.28 | 6.39 | 6.71  | 2jdv | 8.20 | 7.52  | 7.65  |
| 1f5l | 5.28 | 4.56 | 4.40  | 2ff1 | 8.21 | 6.03  | 6.00  |
| 3o5x | 5.28 | 5.86 | 5.54  | 1efy | 8.22 | 5.82  | 5.69  |
| 1c88 | 5.29 | 6.55 | 6.60  | 1h1s | 8.22 | 6.45  | 6.58  |
| 1a69 | 5.30 | 5.79 | 5.73  | 1w1l | 8.22 | 7.09  | 6.98  |
| 1h6h | 5.30 | 4.44 | 4.36  | 2cji | 8.22 | 7.13  | 7.04  |
| 1o0f | 5.30 | 3.95 | 4.08  | 2vvv | 8.22 | 7.18  | 7.17  |
| 1prl | 5.30 | 5.52 | 5.40  | 2zcs | 8.22 | 7.04  | 7.14  |
| 1srg | 5.30 | 6.83 | 6.69  | 3d1y | 8.22 | 8.72  | 8.73  |
| 1vyq | 5.30 | 6.66 | 6.62  | 3e5a | 8.23 | 6.71  | 6.79  |
| 1xbb | 5.30 | 6.41 | 6.56  | 3hll | 8.24 | 7.22  | 6.95  |
| 2oyk | 5.30 | 4.92 | 4.92  | 1nvq | 8.25 | 7.99  | 8.15  |
| 2vk6 | 5.30 | 5.85 | 5.73  | 2pbw | 8.25 | 5.81  | 5.68  |
| 3ebb | 5.30 | 3.97 | 3.85  | 2e2r | 8.26 | 6.61  | 6.58  |
| 3gpo | 5.30 | 5.93 | 6.06  | 2cbj | 8.27 | 5.72  | 5.63  |
| 1hk4 | 5.31 | 7.97 | 11.31 | 3hek | 8.27 | 7.08  | 7.06  |

|      |      |      |      |      |      |       |       |
|------|------|------|------|------|------|-------|-------|
| 1mfd | 5.31 | 4.79 | 4.75 | 1b6l | 8.30 | 7.02  | 7.03  |
| 1lvu | 5.32 | 5.37 | 5.53 | 1rej | 8.30 | 7.31  | 7.31  |
| 1y20 | 5.32 | 6.72 | 6.77 | 1tom | 8.30 | 6.39  | 6.51  |
| 2c80 | 5.33 | 6.15 | 6.18 | 2cen | 8.30 | 9.29  | 9.19  |
| 1zgi | 5.34 | 6.61 | 6.68 | 2imd | 8.30 | 4.67  | 4.65  |
| 3efs | 5.34 | 5.06 | 5.43 | 2v95 | 8.30 | 6.72  | 6.63  |
| 3k4q | 5.34 | 4.48 | 4.91 | 3d20 | 8.30 | 8.05  | 8.13  |
| 3nee | 5.34 | 5.40 | 5.23 | 3fqe | 8.30 | 6.23  | 6.30  |
| 1ql9 | 5.35 | 8.13 | 7.99 | 3gjw | 8.30 | 5.69  | 5.61  |
| 2fxv | 5.35 | 5.50 | 5.47 | 2hs2 | 8.31 | 7.77  | 7.88  |
| 3bc4 | 5.35 | 4.33 | 4.38 | 2gj5 | 8.32 | 6.20  | 5.93  |
| 1adl | 5.36 | 5.01 | 4.85 | 1hwr | 8.33 | 7.08  | 6.93  |
| 1w6y | 5.36 | 5.94 | 5.73 | 2qci | 8.34 | 8.07  | 8.11  |
| 3bv9 | 5.36 | 7.13 | 6.79 | 3f82 | 8.34 | 8.62  | 8.73  |
| 3mf5 | 5.36 | 7.14 | 6.99 | 3npc | 8.34 | 8.57  | 8.69  |
| 1gpk | 5.37 | 6.47 | 6.45 | 1h23 | 8.35 | 8.46  | 8.42  |
| 1sgu | 5.37 | 8.26 | 8.23 | 1mj7 | 8.35 | 6.62  | 6.66  |
| 3lqj | 5.37 | 5.58 | 5.69 | 2uwd | 8.35 | 6.50  | 6.29  |
| 2qhd | 5.38 | 4.04 | 3.94 | 3nu5 | 8.35 | 7.70  | 7.68  |
| 3e85 | 5.38 | 5.37 | 5.29 | 1d4j | 8.36 | 9.60  | 9.37  |
| 1qbv | 5.39 | 6.25 | 6.41 | 3d83 | 8.36 | 8.18  | 8.19  |
| 2h6b | 5.39 | 6.07 | 5.87 | 2nmy | 8.37 | 8.29  | 8.20  |
| 1bp0 | 5.40 | 5.09 | 4.94 | 2nmz | 8.37 | 8.37  | 8.47  |
| 1m7i | 5.40 | 6.47 | 6.41 | 2nnk | 8.37 | 8.75  | 8.63  |
| 1pz5 | 5.40 | 7.29 | 7.44 | 2nnp | 8.37 | 8.70  | 8.67  |
| 1r9l | 5.40 | 5.88 | 5.81 | 1k2l | 8.38 | 6.56  | 6.26  |
| 1trd | 5.40 | 4.74 | 4.77 | 1mu6 | 8.38 | 6.17  | 6.44  |
| 2c1p | 5.40 | 5.94 | 6.05 | 1lzq | 8.39 | 8.29  | 8.26  |
| 2f35 | 5.40 | 4.78 | 4.64 | 1aaq | 8.40 | 7.06  | 6.91  |
| 2i80 | 5.40 | 6.85 | 7.00 | 1b6m | 8.40 | 7.12  | 7.34  |
| 2jdm | 5.40 | 4.29 | 4.23 | 1fd0 | 8.40 | 8.43  | 8.45  |
| 2qg2 | 5.40 | 5.58 | 5.47 | 1fq5 | 8.40 | 9.82  | 9.84  |
| 3b4p | 5.40 | 6.42 | 6.31 | 1fzk | 8.40 | 9.13  | 9.07  |
| 3l6h | 5.40 | 5.47 | 5.41 | 1k22 | 8.40 | 7.16  | 6.86  |
| 2j47 | 5.41 | 6.33 | 6.30 | 1mtr | 8.40 | 7.07  | 7.33  |
| 1gja | 5.42 | 5.61 | 5.55 | 1w5x | 8.40 | 10.64 | 10.72 |
| 1h9z | 5.42 | 5.90 | 5.75 | 1w7x | 8.40 | 7.34  | 7.18  |
| 2vpo | 5.42 | 6.12 | 5.98 | 1z1h | 8.40 | 7.49  | 7.64  |
| 1h0a | 5.44 | 3.82 | 3.95 | 1zpa | 8.40 | 7.86  | 8.03  |
| 1syi | 5.44 | 6.57 | 6.53 | 2baj | 8.40 | 7.48  | 7.22  |
| 2q6f | 5.44 | 7.73 | 7.55 | 2j95 | 8.40 | 7.40  | 7.44  |
| 2iko | 5.45 | 6.28 | 6.49 | 2qbp | 8.40 | 7.78  | 7.37  |
| 1b4h | 5.46 | 5.77 | 6.32 | 2uwl | 8.40 | 7.07  | 6.87  |
| 1lv8 | 5.46 | 5.40 | 5.53 | 2vsl | 8.40 | 5.92  | 6.01  |
| 1q65 | 5.46 | 5.63 | 5.63 | 2zda | 8.40 | 7.10  | 7.02  |

|      |      |      |      |      |      |       |       |
|------|------|------|------|------|------|-------|-------|
| 1gi1 | 5.47 | 5.69 | 5.59 | 3b68 | 8.40 | 7.64  | 7.84  |
| 1o2s | 5.47 | 5.51 | 5.39 | 3d0e | 8.40 | 6.90  | 6.93  |
| 1xh5 | 5.47 | 9.12 | 9.10 | 3eos | 8.40 | 7.27  | 7.35  |
| 2r0z | 5.47 | 7.03 | 6.93 | 1e4h | 8.41 | 5.39  | 3.78  |
| 2xde | 5.47 | 6.92 | 7.01 | 1w96 | 8.41 | 5.86  | 6.04  |
| 3pd2 | 5.47 | 5.68 | 5.83 | 1bwb | 8.42 | 11.40 | 11.26 |
| 1g85 | 5.48 | 4.08 | 4.05 | 2xbv | 8.43 | 7.65  | 7.76  |
| 2cbv | 5.48 | 6.06 | 6.15 | 2za5 | 8.43 | 7.27  | 7.37  |
| 3bxe | 5.48 | 4.79 | 4.75 | 3ggt | 8.43 | 7.51  | 7.52  |
| 3iw6 | 5.48 | 6.87 | 6.80 | 3nhi | 8.43 | 7.05  | 7.04  |
| 1pot | 5.49 | 6.13 | 6.45 | 2vc9 | 8.44 | 6.21  | 6.20  |
| 1pyn | 5.49 | 6.55 | 6.28 | 3kdd | 8.46 | 9.20  | 9.47  |
| 1tys | 5.49 | 5.59 | 5.44 | 2oag | 8.47 | 6.93  | 7.46  |
| 2h4k | 5.49 | 5.85 | 5.43 | 1w5y | 8.48 | 10.48 | 10.50 |
| 2o0u | 5.49 | 7.57 | 7.73 | 2hs1 | 8.48 | 7.64  | 7.74  |
| 2qtr | 5.49 | 7.08 | 7.25 | 2p3b | 8.48 | 9.43  | 9.15  |
| 2uy5 | 5.49 | 5.99 | 6.04 | 2r5p | 8.48 | 8.66  | 8.78  |
| 3bvb | 5.49 | 8.02 | 7.91 | 2uxz | 8.48 | 8.77  | 8.46  |
| 3ga5 | 5.49 | 6.56 | 6.47 | 1ec0 | 8.49 | 10.12 | 10.13 |
| 3hmp | 5.49 | 5.17 | 5.10 | 2g5u | 8.49 | 6.04  | 5.60  |
| 3i73 | 5.49 | 5.96 | 6.28 | 2ieo | 8.49 | 7.72  | 7.67  |
| 3da9 | 5.51 | 6.35 | 6.36 | 2ihq | 8.49 | 7.43  | 7.40  |
| 3kgt | 5.51 | 6.34 | 6.23 | 7upj | 8.49 | 7.74  | 7.50  |
| 1a8i | 5.52 | 5.10 | 5.06 | 3i25 | 8.51 | 10.64 | 11.06 |
| 1lox | 5.52 | 6.86 | 6.80 | 1fcy | 8.52 | 8.54  | 8.50  |
| 1oe8 | 5.52 | 4.27 | 4.26 | 1i5r | 8.52 | 9.62  | 9.83  |
| 1ydr | 5.52 | 6.19 | 6.42 | 1nfx | 8.52 | 7.44  | 7.46  |
| 2cht | 5.52 | 5.61 | 5.52 | 1ta2 | 8.52 | 7.58  | 7.50  |
| 3eys | 5.52 | 6.82 | 6.54 | 1xkk | 8.52 | 8.51  | 8.81  |
| 1bjv | 5.54 | 5.63 | 5.52 | 2boh | 8.52 | 8.18  | 8.12  |
| 1ha2 | 5.54 | 6.14 | 5.96 | 2bxt | 8.52 | 7.57  | 7.54  |
| 2olb | 5.54 | 6.16 | 6.68 | 2fvd | 8.52 | 6.79  | 7.04  |
| 3bxf | 5.54 | 5.04 | 5.14 | 2q64 | 8.52 | 8.24  | 8.23  |
| 1njc | 5.55 | 5.20 | 5.14 | 2qu6 | 8.52 | 7.59  | 7.64  |
| 1y3n | 5.55 | 5.33 | 5.30 | 2vvc | 8.52 | 7.57  | 7.50  |
| 2iuz | 5.55 | 5.79 | 5.75 | 2vw5 | 8.52 | 5.65  | 5.78  |
| 2wyn | 5.55 | 7.03 | 7.04 | 2wn9 | 8.52 | 6.14  | 6.10  |
| 2jdn | 5.56 | 4.67 | 4.60 | 3lpi | 8.52 | 9.13  | 9.19  |
| 1jak | 5.57 | 6.26 | 6.30 | 3kjd | 8.54 | 5.92  | 5.83  |
| 1njd | 5.57 | 5.40 | 5.32 | 1hos | 8.55 | 8.83  | 8.83  |
| 3bex | 5.57 | 5.04 | 4.98 | 1ppl | 8.55 | 7.44  | 7.43  |
| 3coz | 5.57 | 5.81 | 6.11 | 2byr | 8.55 | 8.13  | 8.53  |
| 3jup | 5.58 | 5.85 | 5.57 | 1bgq | 8.57 | 5.62  | 5.45  |
| 1f4x | 5.59 | 4.87 | 4.87 | 1q1g | 8.57 | 6.29  | 6.23  |
| 1mfi | 5.59 | 6.67 | 6.70 | 2x4z | 8.57 | 6.79  | 6.96  |

|      |      |      |      |      |      |       |       |
|------|------|------|------|------|------|-------|-------|
| 3gxy | 5.59 | 4.45 | 4.40 | 3dkf | 8.57 | 7.04  | 7.05  |
| 1o9d | 5.60 | 5.53 | 5.56 | 2wky | 8.59 | 5.88  | 5.97  |
| 1vfn | 5.60 | 5.45 | 5.34 | 1bwa | 8.60 | 11.06 | 11.01 |
| 2wca | 5.60 | 5.50 | 5.30 | 3b66 | 8.60 | 7.03  | 7.41  |
| 3e6y | 5.60 | 5.89 | 5.84 | 2cej | 8.62 | 9.25  | 8.80  |
| 1a08 | 5.62 | 5.99 | 5.89 | 1mue | 8.64 | 6.46  | 6.56  |
| 1ejn | 5.62 | 6.64 | 6.53 | 1t31 | 8.64 | 9.16  | 8.71  |
| 2bmk | 5.62 | 5.01 | 5.11 | 2qry | 8.64 | 6.57  | 6.80  |
| 3e3c | 5.62 | 4.94 | 4.89 | 3hkw | 8.64 | 7.10  | 7.17  |
| 3nes | 5.62 | 5.28 | 5.16 | 6std | 8.64 | 6.87  | 6.37  |
| 3gy3 | 5.63 | 6.19 | 5.95 | 3d1x | 8.66 | 8.82  | 8.73  |
| 3l1n | 5.63 | 4.17 | 4.01 | 3kqc | 8.66 | 8.51  | 8.82  |
| 1lrt | 5.64 | 5.38 | 5.66 | 3nox | 8.66 | 6.46  | 6.26  |
| 2ojg | 5.64 | 6.07 | 5.98 | 2qd6 | 8.68 | 7.94  | 7.94  |
| 2reg | 5.64 | 6.28 | 6.19 | 2q55 | 8.69 | 8.85  | 8.70  |
| 3fwv | 5.64 | 6.60 | 6.41 | 1jgl | 8.70 | 7.47  | 7.30  |
| 3iw7 | 5.64 | 7.11 | 7.01 | 1jyq | 8.70 | 7.66  | 7.47  |
| 1n5r | 5.66 | 5.31 | 5.14 | 1lnm | 8.70 | 7.87  | 7.77  |
| 1nhu | 5.66 | 6.28 | 6.08 | 1ohr | 8.70 | 8.08  | 8.07  |
| 2aod | 5.66 | 7.80 | 7.54 | 1pxo | 8.70 | 6.22  | 6.26  |
| 2erz | 5.66 | 6.88 | 6.83 | 1t7j | 8.70 | 6.99  | 7.00  |
| 3ery | 5.66 | 9.65 | 9.53 | 1w13 | 8.70 | 6.80  | 6.60  |
| 2pqz | 5.67 | 9.13 | 9.14 | 1xap | 8.70 | 7.70  | 7.60  |
| 2qwf | 5.67 | 5.26 | 5.14 | 2b7d | 8.70 | 6.54  | 6.46  |
| 1gnn | 5.68 | 7.33 | 7.08 | 2f8g | 8.70 | 8.00  | 7.95  |
| 1ow4 | 5.68 | 6.79 | 6.87 | 2fr3 | 8.70 | 5.93  | 5.79  |
| 2c92 | 5.68 | 6.36 | 6.40 | 2jh0 | 8.70 | 7.15  | 7.01  |
| 2cbu | 5.68 | 6.73 | 6.71 | 2ojj | 8.70 | 7.15  | 6.91  |
| 2q8z | 5.68 | 6.00 | 5.97 | 2pcp | 8.70 | 7.67  | 7.56  |
| 2vr4 | 5.68 | 5.70 | 5.76 | 2uwo | 8.70 | 7.43  | 7.32  |
| 3b5j | 5.68 | 4.68 | 4.62 | 2wyg | 8.70 | 7.10  | 7.23  |
| 1a99 | 5.70 | 6.02 | 6.18 | 3brn | 8.70 | 5.10  | 5.23  |
| 1egh | 5.70 | 4.89 | 4.96 | 3eqr | 8.70 | 7.15  | 7.53  |
| 1g98 | 5.70 | 4.80 | 4.70 | 3ge7 | 8.70 | 7.30  | 7.17  |
| 1jsv | 5.70 | 5.87 | 5.99 | 3ckz | 8.72 | 5.87  | 5.56  |
| 1n1m | 5.70 | 5.67 | 5.67 | 1b6k | 8.74 | 7.57  | 7.72  |
| 1pgp | 5.70 | 4.14 | 4.10 | 1mjj | 8.74 | 6.65  | 6.66  |
| 2avm | 5.70 | 7.70 | 7.45 | 1sdv | 8.74 | 8.59  | 8.63  |
| 2f2h | 5.70 | 7.23 | 7.24 | 2vkm | 8.74 | 9.55  | 9.59  |
| 2i4z | 5.70 | 7.60 | 7.72 | 2wtv | 8.74 | 7.44  | 7.51  |
| 3acx | 5.70 | 6.92 | 7.02 | 1d4l | 8.77 | 7.56  | 7.76  |
| 3c4h | 5.70 | 6.27 | 6.27 | 1qft | 8.77 | 6.67  | 6.72  |
| 3eks | 5.70 | 7.22 | 7.27 | 1x38 | 8.77 | 6.62  | 6.55  |
| 3kku | 5.70 | 5.86 | 5.51 | 1zp8 | 8.77 | 8.15  | 8.18  |
| 1n7m | 5.71 | 6.86 | 6.94 | 2wkz | 8.77 | 9.26  | 9.25  |

|      |      |      |      |      |      |       |       |
|------|------|------|------|------|------|-------|-------|
| 3lf0 | 5.71 | 5.86 | 6.13 | 3b5r | 8.77 | 7.39  | 7.63  |
| 1obx | 5.72 | 4.53 | 4.54 | 1fkn | 8.80 | 7.77  | 7.67  |
| 2qg0 | 5.72 | 5.77 | 5.82 | 1w5w | 8.80 | 10.54 | 10.57 |
| 3jvr | 5.72 | 6.19 | 5.73 | 3dlz | 8.80 | 8.00  | 7.99  |
| 1o33 | 5.74 | 5.34 | 5.38 | 1m0b | 8.82 | 8.38  | 8.35  |
| 1o5e | 5.74 | 6.95 | 6.82 | 3nu4 | 8.82 | 7.69  | 7.63  |
| 1qy2 | 5.74 | 4.51 | 4.49 | 3mxd | 8.83 | 8.30  | 8.30  |
| 2b1v | 5.74 | 5.87 | 5.81 | 1d4i | 8.85 | 9.75  | 9.73  |
| 2pgz | 5.74 | 6.56 | 6.52 | 2avo | 8.85 | 8.56  | 8.63  |
| 2pqc | 5.74 | 6.39 | 6.36 | 2obf | 8.85 | 7.70  | 7.75  |
| 3gy2 | 5.74 | 5.61 | 5.52 | 3b67 | 8.85 | 7.40  | 8.01  |
| 3ivx | 5.74 | 7.10 | 7.36 | 3e93 | 8.85 | 8.93  | 8.94  |
| 3jyj | 5.74 | 5.81 | 5.66 | 1n3i | 8.89 | 6.55  | 6.47  |
| 1p1o | 5.76 | 5.31 | 5.37 | 1nfy | 8.89 | 7.76  | 7.55  |
| 1jmf | 5.77 | 5.58 | 5.48 | 1nt1 | 8.89 | 7.07  | 7.00  |
| 1o5b | 5.77 | 6.44 | 7.35 | 2idw | 8.89 | 7.76  | 7.60  |
| 1q66 | 5.77 | 6.99 | 7.17 | 1ec1 | 8.92 | 9.28  | 9.28  |
| 1ur9 | 5.77 | 6.76 | 6.69 | 1kzn | 8.92 | 7.06  | 6.72  |
| 1vjv | 5.77 | 4.34 | 4.38 | 3k37 | 8.92 | 5.96  | 5.81  |
| 2boj | 5.77 | 4.44 | 4.34 | 1nfw | 8.96 | 7.36  | 7.32  |
| 3d1e | 5.77 | 5.95 | 5.93 | 2p4j | 8.96 | 9.62  | 9.53  |
| 3k00 | 5.77 | 7.26 | 7.42 | 3i9g | 8.96 | 5.45  | 5.68  |
| 1hmt | 5.79 | 5.21 | 5.16 | 1apv | 9.00 | 6.67  | 6.65  |
| 1g3c | 5.80 | 4.95 | 4.81 | 1fm9 | 9.00 | 8.96  | 8.92  |
| 1kpm | 5.80 | 7.12 | 6.88 | 1k27 | 9.00 | 6.03  | 6.16  |
| 1ppm | 5.80 | 7.42 | 7.37 | 1mq5 | 9.00 | 8.63  | 8.26  |
| 1rle | 5.80 | 4.49 | 4.64 | 1mu8 | 9.00 | 6.44  | 6.69  |
| 1sgx | 5.80 | 4.15 | 3.96 | 1wei | 9.00 | 3.94  | 3.93  |
| 2q88 | 5.80 | 6.74 | 6.62 | 1y0l | 9.00 | 5.53  | 5.40  |
| 1lkl | 5.81 | 5.47 | 5.18 | 2ien | 9.00 | 8.08  | 7.97  |
| 1lgs | 5.82 | 6.28 | 6.11 | 2j4i | 9.00 | 7.55  | 7.46  |
| 1kav | 5.82 | 6.46 | 6.68 | 2p4y | 9.00 | 8.19  | 8.27  |
| 1urg | 5.82 | 4.95 | 4.93 | 2wyj | 9.00 | 7.05  | 7.18  |
| 1vwn | 5.82 | 6.66 | 6.77 | 3jrx | 9.00 | 6.10  | 6.12  |
| 3gss | 5.82 | 6.16 | 5.99 | 3jy9 | 9.00 | 6.94  | 6.90  |
| 3iue | 5.82 | 6.30 | 6.37 | 2q54 | 9.01 | 8.52  | 8.42  |
| 1k4g | 5.85 | 5.41 | 5.36 | 2w9h | 9.01 | 4.79  | 4.90  |
| 1o2w | 5.85 | 5.33 | 4.85 | 1ec3 | 9.04 | 8.78  | 8.58  |
| 1o2x | 5.85 | 5.42 | 4.99 | 1qkt | 9.04 | 6.52  | 6.43  |
| 1ogz | 5.85 | 5.87 | 5.67 | 3m37 | 9.04 | 7.50  | 8.00  |
| 1q63 | 5.85 | 6.12 | 6.12 | 1ebw | 9.05 | 8.01  | 7.87  |
| 1qbn | 5.85 | 5.78 | 5.63 | 1ezq | 9.05 | 7.56  | 7.53  |
| 1u1w | 5.85 | 6.41 | 6.36 | 1kdk | 9.05 | 6.98  | 6.94  |
| 2e5y | 5.85 | 4.89 | 5.14 | 3hb4 | 9.05 | 8.05  | 7.84  |
| 2r3t | 5.85 | 9.51 | 9.50 | 3nu9 | 9.05 | 7.21  | 7.26  |



|      |      |      |      |      |      |       |       |
|------|------|------|------|------|------|-------|-------|
| 2vmf | 5.85 | 6.05 | 6.07 | 1nw4 | 9.07 | 5.60  | 5.56  |
| 3e5u | 5.85 | 6.05 | 5.91 | 2qd8 | 9.07 | 7.79  | 7.88  |
| 1b3l | 5.89 | 5.78 | 6.13 | 3gba | 9.07 | 6.15  | 6.43  |
| 1e1x | 5.89 | 4.95 | 4.92 | 2rkf | 9.08 | 8.40  | 8.23  |
| 1ydk | 5.89 | 5.32 | 5.33 | 3a2o | 9.08 | 8.08  | 8.07  |
| 2brm | 5.89 | 5.82 | 5.88 | 3ffg | 9.08 | 8.65  | 8.82  |
| 2qm7 | 5.89 | 5.00 | 5.06 | 1d3d | 9.09 | 8.37  | 7.97  |
| 3eeb | 5.89 | 5.48 | 5.64 | 1msn | 9.09 | 8.72  | 8.71  |
| 3h1x | 5.89 | 5.48 | 5.25 | 2v58 | 9.09 | 5.89  | 5.33  |
| 1v2n | 5.90 | 7.02 | 6.63 | 2w8y | 9.09 | 8.31  | 8.32  |
| 2weq | 5.90 | 5.49 | 5.75 | 1h22 | 9.10 | 8.27  | 8.18  |
| 1ugx | 5.91 | 4.33 | 4.15 | 2qd7 | 9.10 | 7.95  | 7.97  |
| 1a4w | 5.92 | 7.64 | 7.50 | 3gnw | 9.10 | 7.96  | 8.16  |
| 1aj6 | 5.92 | 5.60 | 5.53 | 3kck | 9.10 | 7.02  | 7.10  |
| 1kyv | 5.92 | 6.06 | 6.01 | 3lpk | 9.10 | 9.45  | 9.65  |
| 1o0h | 5.92 | 4.51 | 4.69 | 1d9i | 9.11 | 6.44  | 6.54  |
| 1pph | 5.92 | 6.47 | 6.32 | 1ta6 | 9.13 | 7.24  | 7.09  |
| 1qka | 5.92 | 6.55 | 6.86 | 2wb5 | 9.13 | 6.37  | 6.26  |
| 1yds | 5.92 | 5.90 | 6.16 | 2qmg | 9.15 | 9.06  | 9.26  |
| 2ans | 5.92 | 5.08 | 5.12 | 2xjx | 9.15 | 6.13  | 5.95  |
| 2pmk | 5.92 | 4.66 | 4.56 | 1z71 | 9.18 | 7.21  | 7.14  |
| 3kgu | 5.92 | 5.60 | 5.73 | 2fgu | 9.18 | 8.72  | 8.71  |
| 3neo | 5.92 | 6.60 | 6.47 | 2xb7 | 9.19 | 7.28  | 7.17  |
| 1fv0 | 5.93 | 5.44 | 5.63 | 1mh5 | 9.21 | 6.59  | 6.60  |
| 1kv1 | 5.94 | 6.20 | 6.05 | 1sqa | 9.21 | 6.09  | 6.20  |
| 1b9j | 5.96 | 6.13 | 6.61 | 1d4k | 9.22 | 8.56  | 8.76  |
| 1d6w | 5.96 | 7.56 | 7.33 | 1fcz | 9.22 | 8.28  | 8.23  |
| 1nl9 | 5.96 | 6.72 | 6.49 | 1hpo | 9.22 | 7.62  | 7.78  |
| 1o36 | 5.96 | 6.06 | 6.11 | 1hps | 9.22 | 8.51  | 8.44  |
| 1q8u | 5.96 | 6.35 | 6.51 | 1hpy | 9.22 | 7.40  | 7.34  |
| 2j79 | 5.96 | 6.00 | 5.87 | 1x39 | 9.22 | 6.38  | 6.29  |
| 2xht | 5.96 | 6.08 | 6.02 | 1z1r | 9.22 | 7.80  | 7.86  |
| 1uwt | 5.97 | 6.07 | 6.05 | 2cer | 9.22 | 6.58  | 6.56  |
| 1uwu | 5.98 | 5.99 | 6.00 | 2o4l | 9.22 | 8.58  | 9.06  |
| 3huc | 5.99 | 6.18 | 6.23 | 1db1 | 9.26 | 7.81  | 7.51  |
| 1a1e | 6.00 | 5.89 | 5.83 | 2avv | 9.26 | 8.71  | 8.64  |
| 1ado | 6.00 | 3.72 | 3.76 | 1sdt | 9.27 | 8.70  | 8.73  |
| 1c5s | 6.00 | 5.73 | 5.77 | 2xab | 9.27 | 6.37  | 6.29  |
| 1ceb | 6.00 | 5.36 | 5.43 | 3b65 | 9.27 | 7.15  | 8.19  |
| 1f0t | 6.00 | 6.30 | 6.33 | 1xow | 9.28 | 7.26  | 7.11  |
| 1gt1 | 6.00 | 5.47 | 5.28 | 3kdc | 9.28 | 9.37  | 9.31  |
| 1hn2 | 6.00 | 5.42 | 5.23 | 2ayr | 9.29 | 9.28  | 9.32  |
| 1jq8 | 6.00 | 6.31 | 6.54 | 1bv7 | 9.30 | 11.30 | 11.06 |
| 1ssq | 6.00 | 4.68 | 4.87 | 2yxj | 9.30 | 9.40  | 9.41  |
| 1xgj | 6.00 | 4.96 | 4.99 | 3kqb | 9.30 | 8.45  | 8.80  |

|      |      |      |      |      |      |       |       |
|------|------|------|------|------|------|-------|-------|
| 1xk5 | 6.00 | 4.81 | 5.06 | 3nu6 | 9.30 | 7.52  | 7.57  |
| 2bvd | 6.00 | 6.15 | 6.18 | 4er2 | 9.30 | 7.14  | 6.97  |
| 2izl | 6.00 | 6.00 | 5.99 | 2aqu | 9.32 | 7.70  | 7.94  |
| 2r43 | 6.00 | 8.69 | 8.84 | 2e27 | 9.35 | 5.87  | 5.80  |
| 2rcn | 6.00 | 5.36 | 5.33 | 2r6w | 9.36 | 8.71  | 8.68  |
| 2vqt | 6.00 | 5.75 | 5.86 | 2z4b | 9.36 | 7.42  | 7.45  |
| 3bze | 6.00 | 9.37 | 9.54 | 2p95 | 9.37 | 7.48  | 7.17  |
| 3l4w | 6.00 | 6.01 | 5.95 | 3nuj | 9.39 | 7.73  | 7.64  |
| 3nex | 6.00 | 6.60 | 6.54 | 1ebz | 9.40 | 8.75  | 8.65  |
| 1b5h | 6.01 | 5.55 | 6.12 | 1fkf | 9.40 | 8.44  | 8.26  |
| 1eb2 | 6.01 | 7.59 | 7.32 | 1ksn | 9.40 | 7.38  | 7.15  |
| 2vl4 | 6.01 | 5.74 | 5.84 | 1met | 9.40 | 8.85  | 8.84  |
| 1tcw | 6.02 | 6.54 | 6.38 | 1pme | 9.40 | 6.93  | 7.15  |
| 3coy | 6.02 | 6.06 | 6.40 | 1sqn | 9.40 | 6.98  | 6.86  |
| 3f3c | 6.02 | 6.47 | 6.68 | 2o4r | 9.40 | 7.91  | 7.68  |
| 5erl | 6.02 | 5.90 | 6.18 | 2w26 | 9.40 | 7.16  | 6.98  |
| 1n8v | 6.03 | 4.67 | 4.26 | 1hsh | 9.42 | 8.32  | 8.35  |
| 1sh9 | 6.03 | 8.38 | 8.42 | 3bgs | 9.42 | 5.86  | 5.79  |
| 1t7d | 6.03 | 5.71 | 5.67 | 3c1k | 9.44 | 6.84  | 6.89  |
| 2ce9 | 6.03 | 7.52 | 7.38 | 1qbs | 9.47 | 8.73  | 8.73  |
| 1xbo | 6.04 | 6.80 | 6.63 | 1xjd | 9.48 | 8.02  | 8.10  |
| 3lbk | 6.04 | 6.84 | 6.50 | 2r6y | 9.49 | 8.14  | 8.32  |
| 3bgb | 6.05 | 7.07 | 7.30 | 1hvr | 9.51 | 10.12 | 10.16 |
| 3gus | 6.05 | 4.26 | 4.10 | 1m4h | 9.52 | 8.34  | 8.16  |
| 3iss | 6.05 | 5.87 | 6.06 | 1re8 | 9.52 | 8.43  | 8.35  |
| 3pcf | 6.05 | 5.91 | 5.93 | 2bys | 9.52 | 8.16  | 8.22  |
| 1g7q | 6.06 | 7.46 | 7.18 | 2g94 | 9.52 | 8.21  | 8.16  |
| 1jmi | 6.06 | 4.73 | 4.66 | 2gvj | 9.52 | 7.15  | 6.99  |
| 1kjr | 6.06 | 4.94 | 5.32 | 3fv3 | 9.52 | 7.04  | 6.81  |
| 1qb6 | 6.06 | 5.71 | 5.92 | 3g0w | 9.52 | 7.02  | 7.28  |
| 2fxs | 6.06 | 5.50 | 5.36 | 2pog | 9.54 | 6.69  | 6.64  |
| 2nnd | 6.06 | 4.90 | 4.93 | 1dmp | 9.55 | 8.92  | 8.92  |
| 1jmg | 6.07 | 5.67 | 5.52 | 1ws1 | 9.55 | 6.13  | 5.86  |
| 2gst | 6.07 | 7.10 | 7.27 | 2jj3 | 9.55 | 7.25  | 7.24  |
| 2w5g | 6.07 | 3.61 | 3.93 | 2z4o | 9.57 | 8.13  | 8.20  |
| 3le8 | 6.07 | 7.09 | 6.97 | 3dp9 | 9.68 | 7.03  | 7.27  |
| 2w7y | 6.08 | 6.42 | 6.31 | 1df8 | 9.70 | 6.12  | 6.10  |
| 3iw5 | 6.08 | 8.35 | 8.72 | 1eby | 9.70 | 9.75  | 9.66  |
| 1o2n | 6.09 | 6.62 | 6.55 | 1fkb | 9.70 | 8.67  | 8.50  |
| 1ogx | 6.09 | 5.99 | 5.85 | 1mrw | 9.70 | 7.86  | 7.87  |
| 1w9u | 6.09 | 6.40 | 6.36 | 2vh6 | 9.70 | 8.23  | 8.28  |
| 1dzk | 6.10 | 4.07 | 4.13 | 1z6e | 9.72 | 7.64  | 7.87  |
| 1gt5 | 6.10 | 5.53 | 5.39 | 2i0g | 9.72 | 7.11  | 6.96  |
| 1lgt | 6.10 | 6.25 | 6.12 | 3fuc | 9.72 | 6.79  | 6.92  |
| 1m2q | 6.10 | 6.20 | 6.10 | 1nh0 | 9.74 | 8.76  | 8.56  |

|      |      |      |      |      |       |       |       |
|------|------|------|------|------|-------|-------|-------|
| 2e7f | 6.10 | 6.02 | 5.79 | 3dk1 | 9.74  | 7.76  | 7.80  |
| 2flr | 6.10 | 7.09 | 7.18 | 3ggg | 9.77  | 7.69  | 7.70  |
| 2p7a | 6.10 | 5.41 | 5.25 | 3nuo | 9.80  | 7.67  | 7.64  |
| 2wed | 6.10 | 7.11 | 7.29 | 1pvn | 9.82  | 6.08  | 6.00  |
| 3cke | 6.10 | 4.90 | 5.16 | 1zsr | 9.82  | 8.45  | 8.45  |
| 1g32 | 6.11 | 7.18 | 7.04 | 3m36 | 9.82  | 7.46  | 7.97  |
| 1m2p | 6.11 | 5.83 | 5.70 | 3nu3 | 9.82  | 7.66  | 7.68  |
| 1o2z | 6.11 | 5.93 | 5.84 | 2std | 9.85  | 6.72  | 6.24  |
| 2qnq | 6.11 | 9.55 | 9.36 | 3kdb | 9.85  | 9.33  | 9.41  |
| 1nc1 | 6.12 | 6.95 | 6.92 | 1e66 | 9.89  | 7.42  | 7.29  |
| 1x8r | 6.12 | 7.04 | 6.89 | 2drc | 9.89  | 5.04  | 5.18  |
| 2fgv | 6.12 | 8.73 | 8.68 | 1hxb | 9.92  | 8.58  | 8.63  |
| 2p2a | 6.12 | 6.97 | 7.02 | 1zsf | 9.92  | 8.25  | 8.18  |
| 2wvt | 6.12 | 5.94 | 6.00 | 3ies | 9.92  | 7.75  | 8.12  |
| 3g9l | 6.13 | 8.08 | 8.13 | 1hvl | 9.95  | 8.80  | 8.79  |
| 2c97 | 6.14 | 5.23 | 5.09 | 1bv9 | 9.96  | 11.19 | 11.02 |
| 2fmt | 6.14 | 5.02 | 5.17 | 1fjs | 9.96  | 6.62  | 6.76  |
| 2zym | 6.14 | 6.86 | 6.87 | 2xmy | 9.96  | 6.76  | 6.88  |
| 1zlv | 6.15 | 5.18 | 5.01 | 1bxo | 10.00 | 7.23  | 7.37  |
| 1ppc | 6.16 | 7.08 | 6.98 | 1d4h | 10.00 | 9.46  | 9.32  |
| 2i4j | 6.16 | 7.33 | 7.49 | 1ec2 | 10.00 | 8.69  | 8.62  |
| 3lpg | 6.16 | 6.03 | 5.98 | 1flr | 10.00 | 6.87  | 6.85  |
| 3m89 | 6.16 | 5.36 | 5.39 | 1gar | 10.00 | 7.28  | 7.10  |
| 1d6v | 6.17 | 6.65 | 6.53 | 1igj | 10.00 | 7.22  | 7.05  |
| 1yc1 | 6.17 | 5.97 | 5.91 | 2zo3 | 10.00 | 7.51  | 7.45  |
| 3hk1 | 6.17 | 5.60 | 5.63 | 3h5b | 10.00 | 8.15  | 8.17  |
| 1xhy | 6.18 | 6.12 | 6.08 | 3mxe | 10.01 | 8.54  | 9.06  |
| 2c3j | 6.18 | 5.69 | 5.60 | 1n4k | 10.05 | 4.09  | 4.12  |
| 2qhm | 6.18 | 5.89 | 5.82 | 1nm6 | 10.05 | 7.05  | 6.97  |
| 1v2k | 6.19 | 8.02 | 7.77 | 3lzu | 10.06 | 7.71  | 7.85  |
| 2bt9 | 6.19 | 4.93 | 4.93 | 1sdu | 10.07 | 8.52  | 8.68  |
| 2qbu | 6.19 | 6.54 | 6.84 | 1sr7 | 10.10 | 8.41  | 8.16  |
| 1owe | 6.20 | 5.87 | 5.77 | 2o4j | 10.10 | 7.76  | 7.74  |
| 1sqt | 6.20 | 6.02 | 6.06 | 2p16 | 10.10 | 7.41  | 7.28  |
| 2aj8 | 6.20 | 6.09 | 6.02 | 1y6r | 10.11 | 6.74  | 6.83  |
| 2qrp | 6.20 | 7.07 | 7.01 | 2qi3 | 10.20 | 7.35  | 7.48  |
| 1b3h | 6.21 | 7.00 | 7.29 | 2qi7 | 10.21 | 7.43  | 7.51  |
| 2zm3 | 6.21 | 6.45 | 5.89 | 1xzx | 10.22 | 8.27  | 10.85 |
| 3acl | 6.22 | 7.30 | 7.49 | 1qbu | 10.24 | 9.04  | 8.94  |
| 3p2e | 6.22 | 5.69 | 5.91 | 1rr6 | 10.25 | 5.81  | 5.75  |
| 3pb3 | 6.22 | 5.59 | 5.93 | 1c70 | 10.30 | 9.27  | 9.34  |
| 3pd9 | 6.22 | 6.01 | 5.94 | 1hvs | 10.30 | 8.33  | 8.48  |
| 1m7d | 6.23 | 5.70 | 5.59 | 2p15 | 10.30 | 8.58  | 8.79  |
| 1hnn | 6.24 | 6.63 | 6.69 | 4std | 10.33 | 6.34  | 6.11  |
| 2fai | 6.24 | 6.09 | 6.02 | 3i6o | 10.35 | 7.87  | 8.14  |

|      |      |       |      |      |       |       |       |
|------|------|-------|------|------|-------|-------|-------|
| 1gnm | 6.25 | 7.25  | 7.00 | 1c4u | 10.37 | 7.61  | 7.27  |
| 1zky | 6.25 | 5.98  | 5.95 | 1kzk | 10.39 | 9.01  | 8.95  |
| 2zdn | 6.25 | 6.76  | 6.51 | 2qi4 | 10.44 | 8.56  | 8.64  |
| 1wcq | 6.26 | 5.12  | 5.18 | 2o4k | 10.46 | 8.27  | 8.35  |
| 2ok1 | 6.26 | 7.24  | 6.99 | 1msm | 10.48 | 9.02  | 8.98  |
| 3bgz | 6.26 | 6.70  | 6.64 | 5std | 10.49 | 7.29  | 7.43  |
| 1pbq | 6.27 | 5.61  | 5.42 | 2o4s | 10.51 | 8.72  | 8.71  |
| 2j94 | 6.27 | 7.07  | 6.87 | 1b8n | 10.52 | 6.19  | 6.17  |
| 3bfu | 6.27 | 5.35  | 5.52 | 1n46 | 10.52 | 7.61  | 7.52  |
| 1afl | 6.28 | 4.85  | 5.15 | 2f81 | 10.52 | 7.96  | 7.97  |
| 1w3l | 6.28 | 5.46  | 5.63 | 1g2o | 10.55 | 6.33  | 6.34  |
| 2aog | 6.28 | 7.35  | 7.29 | 1qbr | 10.57 | 11.10 | 11.12 |
| 2gfd | 6.28 | 5.72  | 5.52 | 2qi6 | 10.57 | 8.52  | 8.62  |
| 3h8b | 6.29 | 10.55 | 9.95 | 3djk | 10.59 | 7.56  | 7.58  |
| 1d4p | 6.30 | 6.91  | 6.68 | 3lzv | 10.59 | 7.83  | 7.81  |
| 1lag | 6.30 | 6.25  | 6.39 | 1qbt | 10.62 | 11.59 | 11.57 |
| 1wdn | 6.30 | 5.88  | 5.96 | 1b8o | 10.64 | 6.15  | 6.09  |
| 1wm1 | 6.30 | 6.11  | 6.16 | 1dif | 10.66 | 9.23  | 9.50  |
| 2oyl | 6.30 | 5.59  | 5.50 | 3cs7 | 10.68 | 7.96  | 8.14  |
| 2q89 | 6.30 | 6.25  | 6.16 | 2pk5 | 10.70 | 10.14 | 10.44 |
| 2vrj | 6.30 | 7.03  | 7.08 | 2o4p | 10.72 | 8.67  | 9.07  |
| 3ebl | 6.30 | 7.19  | 6.99 | 7std | 10.72 | 6.77  | 6.31  |
| 3k5v | 6.30 | 5.93  | 6.21 | 1c4v | 10.80 | 7.82  | 7.74  |
| 1nja | 6.31 | 4.95  | 4.85 | 3gi4 | 10.80 | 8.37  | 8.63  |
| 2bal | 6.31 | 6.27  | 6.36 | 1hxx | 10.82 | 8.80  | 8.96  |
| 1w3j | 6.32 | 5.88  | 5.89 | 2qi5 | 10.85 | 8.04  | 8.22  |
| 2wnc | 6.32 | 6.30  | 6.31 | 3i7e | 10.85 | 7.64  | 7.56  |
| 2zb1 | 6.32 | 7.40  | 7.40 | 2pk6 | 10.89 | 9.87  | 10.17 |
| 2qbr | 6.33 | 6.57  | 6.17 | 1hvi | 10.92 | 8.92  | 8.87  |
| 3hxi | 6.33 | 6.08  | 6.17 | 1hvk | 10.96 | 9.03  | 9.05  |
| 1bdq | 6.34 | 7.58  | 7.70 | 1m7y | 10.96 | 6.36  | 6.59  |
| 1i00 | 6.34 | 5.21  | 4.95 | 3lzs | 10.96 | 7.48  | 7.66  |
| 1w9v | 6.34 | 5.69  | 5.45 | 1dqx | 11.05 | 6.07  | 5.88  |
| 3cj5 | 6.34 | 6.29  | 5.70 | 1q84 | 11.05 | 9.49  | 9.69  |
| 1gjb | 6.35 | 6.13  | 6.14 | 1eix | 11.06 | 6.11  | 6.01  |
| 1gjc | 6.35 | 6.12  | 6.17 | 1lor | 11.06 | 5.83  | 5.73  |
| 2j7f | 6.35 | 6.08  | 6.06 | 1x1z | 11.06 | 5.77  | 5.77  |
| 3ckp | 6.35 | 7.47  | 7.52 | 3k8o | 11.07 | 5.91  | 5.96  |
| 3ctt | 6.35 | 6.28  | 6.34 | 1d4y | 11.10 | 8.64  | 8.80  |
| 3ed0 | 6.35 | 4.78  | 4.79 | 3std | 11.11 | 7.07  | 7.30  |
| 3fvh | 6.35 | 5.66  | 5.47 | 1mq6 | 11.15 | 7.80  | 7.50  |
| 3hik | 6.35 | 5.77  | 5.52 | 2i4v | 11.20 | 7.84  | 7.87  |
| 1c5q | 6.36 | 6.03  | 6.89 | 3gi5 | 11.22 | 8.09  | 8.08  |
| 1ela | 6.36 | 6.40  | 6.58 | 3gi6 | 11.22 | 8.15  | 8.43  |
| 1o2o | 6.36 | 6.05  | 6.13 | 3ok9 | 11.23 | 8.10  | 8.20  |

|      |      |      |      |      |       |      |      |
|------|------|------|------|------|-------|------|------|
| 3g90 | 6.36 | 6.80 | 6.92 | 1hpx | 11.26 | 8.18 | 8.19 |
| 1hbv | 6.37 | 7.13 | 7.09 | 3k8q | 11.28 | 5.33 | 5.29 |
| 1hms | 6.37 | 4.91 | 4.77 | 1pro | 11.30 | 8.64 | 8.70 |
| 2qpq | 6.37 | 4.36 | 4.25 | 2q5k | 11.30 | 8.64 | 8.60 |
| 2zdk | 6.37 | 6.84 | 6.66 | 2x00 | 11.33 | 7.95 | 7.96 |
| 2hkf | 6.38 | 7.48 | 7.15 | 2j62 | 11.34 | 6.65 | 6.55 |
| 1lol | 6.39 | 4.72 | 4.63 | 2hb3 | 11.35 | 8.13 | 8.04 |
| 10gs | 6.40 | 6.43 | 6.39 | 1hvj | 11.40 | 8.82 | 8.83 |
| 1a1b | 6.40 | 5.50 | 5.37 | 2i0a | 11.40 | 7.90 | 7.97 |
| 1a1c | 6.40 | 5.88 | 5.71 | 1lyb | 11.42 | 7.09 | 7.04 |
| 1i7z | 6.40 | 6.31 | 6.31 | 2i4u | 11.57 | 7.83 | 7.96 |
| 1usk | 6.40 | 6.09 | 6.17 | 2i4w | 11.59 | 7.96 | 8.28 |
| 1yvm | 6.40 | 4.88 | 4.81 | 2i4d | 11.68 | 7.71 | 7.97 |
| 2g9q | 6.40 | 4.96 | 5.02 | 1y6q | 11.70 | 6.45 | 6.59 |
| 2o2u | 6.40 | 6.48 | 6.62 | 2i4x | 11.72 | 8.04 | 8.24 |
| 2zaz | 6.40 | 6.06 | 6.14 | 1duv | 11.80 | 6.11 | 6.14 |
| 2zdl | 6.40 | 6.57 | 6.38 | 1sl3 | 11.85 | 7.24 | 7.10 |

**Supplementary Table 4.** Calculation results for KECSA, KECSA LJ, KECSA entropy and Ligand MW correlated with experimental binding affinity.

| PDB ID | exp. Data (pKd) | KECSA (pKd) | LJ Potentials in KECSA | Entropy in KECSA | Ligand Molecular Weight (Dalton) | PDB ID | exp. Data (pKd) | KECSA (pKd) | LJ Potentials in KECSA | Entropy in KECSA | Ligand Molecular Weight (Dalton) |
|--------|-----------------|-------------|------------------------|------------------|----------------------------------|--------|-----------------|-------------|------------------------|------------------|----------------------------------|
| 3ful   | 2.20            | 5.20        | -12.68                 | -6.19            | 254                              | 1ydd   | 6.10            | 5.25        | -13.73                 | -6.16            | 200                              |
| 3max   | 3.10            | 6.09        | -8.70                  | -7.82            | 194                              | 3kvx   | 4.39            | 5.24        | -11.50                 | -6.36            | 132                              |
| 2q72   | 3.30            | 6.26        | -14.38                 | -7.54            | 216                              | 1kz8   | 7.70            | 6.85        | -18.16                 | -8.03            | 442                              |
| 1ps3   | 5.74            | 8.70        | -33.53                 | -9.22            | 572                              | 1htf   | 6.22            | 5.37        | -14.15                 | -6.30            | 309                              |
| 3kyf   | 4.41            | 7.35        | -16.54                 | -8.89            | 200                              | 2b54   | 7.20            | 6.35        | -16.83                 | -7.44            | 342                              |
| 2qch   | 2.92            | 5.85        | -5.28                  | -7.81            | 173                              | 1o3b   | 5.36            | 6.21        | -7.82                  | -8.07            | 322                              |
| 3hzy   | 2.60            | 5.53        | -8.71                  | -7.03            | 178                              | 3ebi   | 4.94            | 5.79        | -16.36                 | -6.68            | 326                              |
| 1z95   | 8.00            | 5.07        | -12.99                 | -5.98            | 359                              | 2f3f   | 7.44            | 8.29        | -30.82                 | -8.89            | 683                              |
| 3hxe   | 2.30            | 5.23        | -11.16                 | -6.37            | 238                              | 3f2a   | 4.49            | 5.33        | -6.86                  | -6.92            | 221                              |
| 1af2   | 4.42            | 7.33        | -22.28                 | -8.32            | 514                              | 1uyc   | 7.42            | 6.58        | -22.59                 | -7.23            | 270                              |
| 2ay9   | 6.48            | 3.58        | -5.08                  | -4.60            | 250                              | 3i6c   | 6.10            | 6.94        | -16.01                 | -8.36            | 503                              |
| 1ew8   | 3.11            | 6.01        | -10.25                 | -7.56            | 164                              | 3hs4   | 7.03            | 7.87        | -32.10                 | -8.18            | 502                              |
| 2j9a   | 4.79            | 7.67        | -30.08                 | -8.09            | 632                              | 1nym   | 6.07            | 6.91        | -15.38                 | -8.37            | 521                              |
| 1iem   | 4.41            | 7.29        | -16.92                 | -8.77            | 200                              | 2cmb   | 4.97            | 5.81        | -14.60                 | -6.88            | 333                              |
| 3dda   | 6.22            | 9.10        | -36.84                 | -9.48            | 579                              | 2bz5   | 5.85            | 5.01        | -10.80                 | -6.10            | 366                              |
| 3hxd   | 3.85            | 6.73        | -17.08                 | -7.95            | 241                              | 2cfd   | 2.52            | 3.36        | -4.55                  | -4.34            | 189                              |
| 1qji   | 3.30            | 6.18        | -10.21                 | -7.81            | 196                              | 3h23   | 7.85            | 7.01        | -23.50                 | -7.76            | 383                              |

|      |      |      |        |        |     |      |      |      |        |        |     |
|------|------|------|--------|--------|-----|------|------|------|--------|--------|-----|
| 3ftz | 2.92 | 5.80 | -5.64  | -7.69  | 173 | 3odk | 7.85 | 7.01 | -31.37 | -7.03  | 435 |
| 3hxc | 3.12 | 5.99 | -14.34 | -7.16  | 440 | 3fjg | 4.22 | 5.06 | -11.33 | -6.12  | 191 |
| 3ddb | 7.30 | 4.44 | -5.64  | -5.77  | 152 | lgca | 6.96 | 7.80 | -15.78 | -9.59  | 534 |
| 3blu | 6.70 | 3.85 | -1.51  | -5.31  | 123 | lkcs | 3.00 | 3.84 | -2.57  | -5.20  | 153 |
| 3mlb | 7.40 | 4.57 | -10.83 | -5.47  | 157 | 3fui | 6.91 | 6.07 | -14.27 | -7.29  | 375 |
| 2woq | 7.21 | 4.39 | -7.42  | -5.53  | 266 | lo2g | 6.68 | 5.85 | -19.38 | -6.49  | 354 |
| 1wly | 5.22 | 8.03 | -29.14 | -8.68  | 472 | 3mke | 7.19 | 6.36 | -20.09 | -7.15  | 360 |
| 1o4i | 5.30 | 8.10 | -25.96 | -9.07  | 373 | 3cvk | 7.89 | 7.06 | -18.79 | -8.26  | 529 |
| 3hww | 2.60 | 5.38 | -7.94  | -6.90  | 189 | 2aia | 7.16 | 7.99 | -30.17 | -8.53  | 699 |
| 3lp1 | 3.00 | 5.78 | -10.39 | -7.22  | 165 | 3lfs | 7.82 | 6.99 | -24.95 | -7.59  | 467 |
| 3blt | 3.68 | 6.46 | -19.82 | -7.31  | 789 | 2zsc | 6.00 | 6.83 | -12.36 | -8.53  | 281 |
| 1xh8 | 4.15 | 6.92 | -16.84 | -8.25  | 558 | 1l5q | 5.67 | 4.84 | -8.09  | -6.11  | 222 |
| 2ay1 | 3.30 | 6.07 | -10.26 | -7.66  | 224 | 2a3w | 4.30 | 5.12 | -12.41 | -6.11  | 280 |
| 3ftv | 3.49 | 6.26 | -8.31  | -8.10  | 340 | 3mpf | 7.70 | 6.88 | -26.58 | -7.28  | 372 |
| 1nxy | 5.07 | 7.83 | -22.98 | -8.97  | 425 | 2cni | 6.52 | 5.70 | -16.07 | -6.59  | 290 |
| 2ay7 | 7.76 | 5.00 | -7.78  | -6.36  | 257 | 2bks | 5.76 | 4.94 | -11.18 | -5.96  | 342 |
| 2pcu | 5.30 | 8.05 | -25.19 | -9.07  | 418 | li7g | 5.64 | 4.82 | -2.17  | -6.63  | 121 |
| 1hn4 | 2.52 | 5.26 | -9.03  | -6.61  | 342 | 2off | 6.05 | 6.87 | -17.79 | -8.09  | 350 |
| 1a7c | 6.82 | 9.55 | -42.91 | -9.56  | 596 | 1axz | 5.72 | 6.54 | -22.33 | -7.20  | 238 |
| 3l0n | 2.96 | 5.68 | -8.38  | -7.28  | 153 | 3ee2 | 4.52 | 5.34 | -6.36  | -6.97  | 258 |
| 2wo8 | 3.38 | 6.09 | -15.87 | -7.16  | 333 | 7abp | 7.10 | 6.28 | -19.88 | -7.06  | 498 |
| 1wbv | 4.65 | 7.35 | -14.92 | -9.04  | 455 | 1o39 | 5.52 | 6.34 | -24.14 | -6.74  | 431 |
| 3hfj | 6.40 | 9.10 | -12.68 | -11.72 | 307 | 3hw1 | 6.34 | 7.16 | -12.44 | -8.99  | 369 |
| 2j83 | 7.40 | 4.71 | -8.39  | -5.90  | 290 | 2wf4 | 7.51 | 6.70 | -19.26 | -7.70  | 275 |
| 2vvo | 4.59 | 7.27 | -18.74 | -8.57  | 456 | 3pa8 | 7.10 | 7.91 | -19.25 | -9.43  | 488 |
| 2ay8 | 6.68 | 9.36 | -35.77 | -9.95  | 605 | 3eju | 6.36 | 7.17 | -20.67 | -8.25  | 634 |
| 3dek | 7.49 | 4.81 | -8.30  | -6.05  | 235 | 1add | 2.24 | 3.05 | -2.11  | -4.13  | 180 |
| 2gfj | 6.10 | 8.78 | -37.94 | -8.93  | 566 | 1o2y | 6.32 | 7.13 | -17.76 | -8.46  | 308 |
| 3fcq | 3.81 | 6.48 | -22.01 | -7.15  | 383 | 2ajl | 4.19 | 5.00 | -10.40 | -6.13  | 342 |
| 3fty | 2.82 | 5.49 | -11.74 | -6.69  | 128 | 2vo7 | 5.52 | 6.33 | -14.36 | -7.65  | 373 |
| 1yly | 3.37 | 6.04 | -8.35  | -7.78  | 121 | 1sc8 | 7.94 | 7.13 | -17.50 | -8.48  | 529 |
| 2flb | 2.25 | 4.92 | -16.04 | -5.48  | 646 | 3ha6 | 5.89 | 5.08 | -13.31 | -5.96  | 373 |
| 4fiv | 2.70 | 5.36 | -5.94  | -7.05  | 101 | 3l5d | 7.30 | 6.49 | -12.02 | -8.08  | 248 |
| 3gwv | 3.52 | 6.17 | -14.05 | -7.44  | 311 | 3kah | 4.64 | 5.45 | -18.10 | -6.05  | 344 |
| 3fuj | 5.82 | 8.47 | -13.41 | -10.76 | 404 | ljvp | 5.00 | 4.19 | -9.71  | -5.04  | 321 |
| 3k3j | 6.83 | 4.19 | -3.96  | -5.57  | 178 | 2gg2 | 7.22 | 6.41 | -13.21 | -7.86  | 416 |
| 1evh | 3.60 | 6.24 | -20.72 | -6.92  | 292 | 2qp6 | 4.92 | 5.73 | -16.87 | -6.55  | 393 |
| 3bwk | 4.52 | 7.15 | -11.47 | -9.08  | 306 | 2brg | 5.68 | 6.49 | -17.53 | -7.57  | 331 |
| 3fts | 6.28 | 8.91 | -15.49 | -11.20 | 338 | 2gg7 | 8.00 | 8.81 | -19.85 | -10.64 | 567 |
| 3o87 | 5.43 | 8.06 | -29.60 | -8.67  | 501 | 1ftk | 5.32 | 6.13 | -12.16 | -7.56  | 164 |
| 3pcb | 3.35 | 5.97 | -9.41  | -7.59  | 352 | 1qcp | 6.28 | 7.08 | -8.02  | -9.30  | 325 |
| 1wlp | 4.08 | 6.70 | -26.18 | -7.06  | 272 | 1mmr | 6.40 | 5.60 | -5.89  | -7.39  | 90  |
| 2ay4 | 5.31 | 7.91 | -23.03 | -9.08  | 446 | 2qoe | 7.94 | 7.14 | -4.59  | -9.70  | 237 |
| 3dxl | 2.70 | 5.30 | -11.13 | -6.48  | 253 | loi9 | 8.00 | 7.20 | -21.39 | -8.22  | 392 |
| 3ftu | 3.05 | 5.65 | -12.04 | -6.89  | 368 | 1qxl | 7.85 | 7.06 | -27.33 | -7.47  | 358 |

|      |      |      |        |        |     |      |      |      |        |        |     |
|------|------|------|--------|--------|-----|------|------|------|--------|--------|-----|
| 2ay5 | 7.19 | 9.79 | -22.09 | -11.82 | 413 | 2wf3 | 5.80 | 6.59 | -17.17 | -7.75  | 346 |
| 1gj4 | 8.00 | 5.40 | -9.36  | -6.79  | 360 | 1cnx | 6.27 | 5.48 | -13.13 | -6.55  | 378 |
| 3ezr | 4.60 | 2.01 | -1.62  | -2.69  | 203 | 2vew | 6.82 | 6.03 | -11.11 | -7.52  | 208 |
| 2ay6 | 5.30 | 7.89 | -25.69 | -8.80  | 396 | 3h9o | 7.33 | 6.54 | -20.50 | -7.37  | 473 |
| 1t48 | 3.40 | 5.99 | -8.17  | -7.73  | 322 | 2fjm | 6.05 | 6.84 | -11.96 | -8.58  | 242 |
| 1p6e | 6.52 | 3.93 | -11.86 | -4.47  | 498 | 1bl6 | 7.92 | 8.71 | -29.01 | -9.65  | 552 |
| 2f8i | 2.70 | 5.29 | -11.36 | -6.44  | 133 | 2q2n | 7.16 | 7.94 | -37.71 | -7.76  | 536 |
| 2oiq | 5.60 | 8.18 | -13.48 | -10.34 | 342 | 4sga | 6.23 | 7.01 | -26.72 | -7.46  | 439 |
| 1pi5 | 3.60 | 6.17 | -16.20 | -7.24  | 321 | 1mx1 | 6.82 | 6.04 | -14.93 | -7.17  | 185 |
| 1zp5 | 7.70 | 5.13 | -8.27  | -6.51  | 385 | 1qw7 | 7.55 | 6.77 | -15.09 | -8.20  | 541 |
| 1d3v | 4.55 | 7.12 | -17.38 | -8.47  | 456 | 2cnf | 7.80 | 7.02 | -4.14  | -9.57  | 222 |
| 1l6y | 7.70 | 5.14 | -15.09 | -5.89  | 222 | 2wcg | 7.05 | 6.27 | -12.61 | -7.72  | 334 |
| 3o86 | 2.30 | 4.86 | -7.63  | -6.17  | 236 | 1o3c | 7.89 | 7.11 | -16.83 | -8.52  | 459 |
| 1utt | 8.00 | 5.45 | -7.65  | -7.01  | 180 | 3ddu | 7.05 | 6.27 | -16.72 | -7.34  | 454 |
| 1w31 | 7.23 | 4.68 | -7.63  | -5.93  | 281 | 13gs | 7.41 | 8.19 | -24.90 | -9.30  | 601 |
| 3nk8 | 5.50 | 8.05 | -30.72 | -8.56  | 371 | 2xck | 6.07 | 6.85 | -15.57 | -8.26  | 440 |
| 2ccb | 4.12 | 6.67 | -7.96  | -8.71  | 196 | 1uyk | 5.99 | 5.21 | -15.10 | -5.99  | 599 |
| 1hyv | 4.46 | 7.00 | -17.94 | -8.25  | 356 | 1w83 | 4.48 | 5.26 | -8.75  | -6.64  | 302 |
| 2ow7 | 7.97 | 5.43 | -14.14 | -6.39  | 382 | 2bgr | 7.39 | 6.61 | -18.49 | -7.66  | 429 |
| 1w1t | 3.39 | 5.92 | -15.82 | -6.93  | 390 | 3lk0 | 5.22 | 4.45 | -5.51  | -5.79  | 245 |
| 1hxc | 3.28 | 5.81 | -12.28 | -7.10  | 322 | 2w92 | 6.60 | 7.37 | -10.12 | -9.51  | 339 |
| 1ecq | 5.24 | 7.76 | -24.28 | -8.75  | 674 | 2ai8 | 4.52 | 5.29 | -10.69 | -6.51  | 184 |
| 2fla | 4.00 | 6.52 | -15.63 | -7.79  | 523 | 3e9b | 7.20 | 7.97 | -9.81  | -10.39 | 532 |
| 1w1v | 3.30 | 5.82 | -16.41 | -6.73  | 296 | 2x8d | 6.48 | 7.25 | -21.46 | -8.29  | 420 |
| 1ec9 | 3.15 | 5.66 | -6.62  | -7.40  | 135 | 3e62 | 7.03 | 7.80 | -25.88 | -8.65  | 593 |
| 3n1v | 7.13 | 4.64 | -4.14  | -6.19  | 252 | 1sqi | 4.44 | 5.21 | -17.79 | -5.73  | 489 |
| 2viy | 4.40 | 6.89 | -22.84 | -7.65  | 538 | 3h0w | 5.68 | 6.45 | -14.47 | -7.80  | 164 |
| 1i8j | 3.22 | 5.71 | -9.69  | -7.19  | 193 | 3ig7 | 8.00 | 7.23 | -22.27 | -8.19  | 659 |
| 2aay | 4.87 | 7.35 | -25.79 | -8.03  | 595 | 2qaf | 6.46 | 5.70 | -9.26  | -7.21  | 176 |
| 1o4p | 7.68 | 5.21 | -13.22 | -6.16  | 289 | 2vd0 | 5.52 | 4.76 | -8.62  | -5.94  | 306 |
| 3c9e | 6.70 | 4.24 | -12.21 | -4.88  | 496 | 2cfg | 7.70 | 8.46 | -25.97 | -9.59  | 420 |
| 3dyo | 4.00 | 6.46 | -7.47  | -8.46  | 346 | 2prj | 6.48 | 5.72 | -15.16 | -6.70  | 287 |
| 2wfg | 5.14 | 2.69 | -1.75  | -3.65  | 191 | 3l5r | 7.55 | 6.79 | -16.45 | -8.09  | 476 |
| 3ieo | 2.82 | 5.27 | -10.18 | -6.52  | 187 | 3c8b | 6.22 | 6.98 | -18.93 | -8.14  | 331 |
| 1k2i | 3.00 | 5.45 | -9.02  | -6.88  | 180 | 3fxv | 5.82 | 5.06 | -11.14 | -6.14  | 320 |
| 1eed | 3.70 | 6.15 | -8.07  | -7.96  | 349 | 3c89 | 5.70 | 4.94 | -15.99 | -5.52  | 253 |
| 1l6s | 7.00 | 4.56 | -11.67 | -5.37  | 666 | 3lle | 7.25 | 8.01 | -30.31 | -8.54  | 467 |
| 2viz | 2.88 | 5.32 | -8.41  | -6.77  | 312 | 1o2v | 5.30 | 4.54 | -5.50  | -5.93  | 147 |
| 1sre | 7.74 | 5.30 | -10.16 | -6.57  | 159 | 1rq2 | 7.12 | 7.87 | -31.86 | -8.20  | 431 |
| 2aqb | 4.11 | 6.55 | -15.12 | -7.88  | 375 | 3i5n | 7.08 | 6.33 | -12.18 | -7.84  | 370 |
| 2aa9 | 7.14 | 4.70 | -11.49 | -5.60  | 291 | 3bel | 7.85 | 8.60 | -36.62 | -8.79  | 517 |
| 1h9l | 7.15 | 9.58 | -35.12 | -10.32 | 654 | 2w6o | 6.12 | 6.87 | -22.56 | -7.64  | 469 |
| 1qtn | 4.00 | 6.43 | -18.06 | -7.44  | 378 | 2cng | 6.60 | 7.35 | -12.72 | -9.23  | 270 |
| 1nki | 7.59 | 5.17 | -8.18  | -6.56  | 241 | 2rka | 4.81 | 4.06 | -9.35  | -4.89  | 115 |
| 1zoe | 3.01 | 5.43 | -9.65  | -6.81  | 122 | 2hha | 7.68 | 6.94 | -15.81 | -8.37  | 421 |

|      |      |      |        |       |     |      |      |      |        |       |     |
|------|------|------|--------|-------|-----|------|------|------|--------|-------|-----|
| 2q9m | 2.85 | 5.27 | -5.39  | -6.97 | 88  | 3ddq | 7.70 | 6.96 | -23.90 | -7.64 | 401 |
| 1zz2 | 2.00 | 4.42 | -8.69  | -5.46 | 214 | 3f7z | 2.30 | 3.04 | -6.65  | -3.69 | 470 |
| 3jzf | 2.70 | 5.12 | -9.02  | -6.42 | 204 | 1npz | 7.19 | 6.45 | -20.08 | -7.28 | 366 |
| 2c4v | 7.91 | 5.50 | -20.38 | -5.90 | 452 | 1epp | 6.47 | 5.73 | -16.58 | -6.58 | 318 |
| 2wa3 | 4.52 | 6.93 | -17.41 | -8.21 | 393 | 1q3d | 5.04 | 5.78 | -6.87  | -7.55 | 171 |
| 1qsc | 3.19 | 5.60 | -6.75  | -7.31 | 100 | 3ddg | 7.12 | 6.38 | -15.81 | -7.58 | 312 |
| 2alv | 8.00 | 5.60 | -7.61  | -7.24 | 180 | 2bb7 | 4.36 | 5.10 | -6.48  | -6.63 | 173 |
| 2aq7 | 4.10 | 6.49 | -11.10 | -8.17 | 254 | 2pix | 5.15 | 4.41 | -4.01  | -5.88 | 185 |
| 2qcf | 3.11 | 5.50 | -4.25  | -7.41 | 168 | 2qoh | 7.52 | 6.78 | -11.58 | -8.54 | 257 |
| 2i7c | 5.18 | 7.57 | -8.17  | -9.97 | 166 | 2v3e | 7.70 | 6.96 | -19.31 | -8.08 | 309 |
| 2ccc | 3.91 | 6.29 | -17.69 | -7.28 | 443 | 1rhm | 6.77 | 6.04 | -20.39 | -6.67 | 498 |
| 3jzi | 7.66 | 5.28 | -6.78  | -6.86 | 296 | 1f57 | 6.05 | 6.78 | -19.58 | -7.80 | 418 |
| 1wdr | 6.70 | 9.08 | -35.71 | -9.56 | 652 | 1pxl | 5.00 | 5.73 | -10.92 | -7.11 | 271 |
| 3ipe | 4.47 | 6.85 | -18.64 | -7.98 | 427 | 3c4f | 5.09 | 5.82 | -8.10  | -7.50 | 419 |
| 1ykp | 4.85 | 7.23 | -21.13 | -8.28 | 439 | 1z4n | 6.15 | 6.88 | -17.26 | -8.15 | 492 |
| 3a73 | 7.46 | 5.09 | -10.49 | -6.24 | 264 | liau | 5.87 | 6.60 | -11.49 | -8.29 | 225 |
| 2w12 | 5.42 | 3.05 | -4.75  | -3.89 | 88  | 1h07 | 5.57 | 4.84 | -11.27 | -5.82 | 329 |
| 1igb | 7.43 | 5.07 | -2.98  | -6.91 | 169 | 1xq0 | 7.35 | 6.62 | -20.82 | -7.45 | 401 |
| 1f8c | 4.95 | 7.31 | -19.60 | -8.55 | 494 | 2uw5 | 5.96 | 5.23 | -12.03 | -6.30 | 360 |
| 1d04 | 7.43 | 5.07 | -8.42  | -6.40 | 252 | 2fq6 | 7.75 | 7.02 | -24.08 | -7.72 | 523 |
| 2wf0 | 5.85 | 8.21 | -28.49 | -8.99 | 572 | 1o49 | 4.70 | 5.43 | -11.34 | -6.64 | 239 |
| 2xdm | 3.00 | 5.36 | -16.93 | -6.02 | 200 | 2os9 | 6.30 | 5.58 | -8.06  | -7.16 | 386 |
| 1meu | 6.10 | 3.74 | -11.61 | -4.23 | 158 | 3ebh | 7.31 | 8.03 | -20.29 | -9.51 | 481 |
| 2hu6 | 7.22 | 4.87 | -15.65 | -5.45 | 451 | 3cr5 | 6.50 | 7.22 | -9.11  | -9.39 | 175 |
| 3fue | 4.10 | 6.45 | -18.65 | -7.41 | 638 | 2hwi | 6.60 | 7.32 | -17.15 | -8.79 | 333 |
| 1v2v | 3.40 | 5.75 | -11.40 | -7.09 | 239 | 1mem | 6.63 | 5.91 | -13.95 | -7.08 | 458 |
| 1ukt | 2.52 | 4.87 | -4.12  | -6.52 | 184 | 2viq | 6.70 | 7.42 | -28.47 | -7.87 | 584 |
| 2uyn | 3.80 | 6.15 | -18.00 | -7.04 | 428 | 2vvn | 7.35 | 6.63 | -16.30 | -7.89 | 413 |
| 2fyv | 2.00 | 4.34 | -6.70  | -5.53 | 251 | 2brh | 7.62 | 8.34 | -30.81 | -8.96 | 629 |
| 3bet | 3.77 | 6.11 | -17.50 | -7.04 | 442 | 1hlk | 6.77 | 6.05 | -17.26 | -6.98 | 368 |
| 3e6v | 7.70 | 5.37 | -17.07 | -6.02 | 331 | 2fv9 | 5.40 | 4.68 | -8.44  | -5.86 | 290 |
| 2q6h | 5.35 | 7.68 | -12.40 | -9.74 | 699 | 2c93 | 5.27 | 5.99 | -12.63 | -7.31 | 381 |
| 2gfk | 3.00 | 5.33 | -9.35  | -6.69 | 202 | 2xk3 | 6.40 | 5.68 | -16.41 | -6.54 | 366 |
| 1atl | 7.00 | 4.67 | -3.77  | -6.27 | 299 | 1qin | 5.44 | 6.16 | -13.31 | -7.49 | 389 |
| 3k5f | 7.89 | 5.56 | -11.45 | -6.82 | 255 | 1oim | 4.89 | 4.17 | -9.15  | -5.07 | 339 |
| 2qcm | 6.44 | 8.77 | -34.76 | -9.20 | 490 | 1mqg | 7.44 | 8.15 | -27.50 | -9.01 | 502 |
| 2d06 | 7.43 | 5.11 | -9.00  | -6.41 | 264 | 1i7c | 5.85 | 5.14 | -11.20 | -6.24 | 258 |
| 3fcb | 6.82 | 4.50 | -7.95  | -5.64 | 260 | 3dcs | 5.22 | 4.51 | -11.88 | -5.29 | 342 |
| 1br5 | 4.77 | 7.09 | -6.90  | -9.40 | 153 | 1bzs | 7.34 | 6.63 | -19.17 | -7.62 | 445 |
| 1gvk | 7.19 | 4.87 | -6.35  | -6.32 | 323 | 3l8x | 6.35 | 7.06 | -21.69 | -8.00 | 583 |
| 3f7b | 3.97 | 6.28 | -12.05 | -7.78 | 190 | 2xk6 | 6.52 | 5.81 | -8.70  | -7.43 | 185 |
| 1dqn | 2.82 | 5.13 | -11.81 | -6.17 | 204 | 1p06 | 4.08 | 4.79 | -5.13  | -6.31 | 206 |
| 2r1w | 2.49 | 4.79 | -8.02  | -6.05 | 214 | 2rfh | 7.64 | 8.35 | -33.10 | -8.77 | 532 |
| 3cpc | 3.30 | 5.60 | -15.86 | -6.47 | 227 | 2ank | 6.05 | 6.76 | -16.69 | -8.03 | 380 |
| 2qed | 2.74 | 5.03 | -8.93  | -6.31 | 240 | 2nns | 7.77 | 7.06 | -27.28 | -7.48 | 684 |



|      |      |      |        |        |     |      |      |      |        |        |     |
|------|------|------|--------|--------|-----|------|------|------|--------|--------|-----|
| 3hzv | 6.03 | 8.32 | -14.60 | -10.44 | 250 | 2irz | 4.08 | 4.79 | -12.30 | -5.65  | 343 |
| 3fuh | 7.62 | 5.33 | -11.49 | -6.49  | 197 | 1xuo | 6.70 | 5.99 | -14.82 | -7.12  | 598 |
| 3bl1 | 4.70 | 6.99 | -11.08 | -8.88  | 314 | 3dv1 | 4.88 | 5.59 | -13.26 | -6.69  | 218 |
| 3kn0 | 7.96 | 5.68 | -9.88  | -7.13  | 216 | 1lrh | 7.33 | 8.04 | -27.82 | -8.81  | 473 |
| 1h8y | 6.20 | 8.48 | -34.63 | -8.81  | 444 | 1tlp | 6.22 | 6.93 | -19.84 | -7.98  | 437 |
| 1czo | 7.66 | 5.38 | -15.67 | -6.18  | 455 | 3czv | 4.30 | 5.00 | -4.41  | -6.68  | 166 |
| 2agv | 2.70 | 4.97 | -7.90  | -6.31  | 154 | 1xug | 5.02 | 5.72 | -5.60  | -7.59  | 150 |
| 1o4g | 2.10 | 4.36 | -10.73 | -5.19  | 306 | 3i81 | 5.70 | 6.40 | -13.05 | -7.86  | 374 |
| 9abp | 4.66 | 6.92 | -21.05 | -7.86  | 498 | 1nox | 4.40 | 5.10 | -10.96 | -6.22  | 345 |
| 3f8e | 5.94 | 8.20 | -26.83 | -9.13  | 621 | 2fjn | 6.05 | 6.75 | -22.95 | -7.44  | 420 |
| 3lfn | 5.71 | 7.97 | -23.85 | -9.08  | 576 | 1mmp | 6.72 | 6.02 | -19.53 | -6.72  | 292 |
| 3fu5 | 7.70 | 5.44 | -8.02  | -6.97  | 189 | 1kl5 | 7.48 | 8.18 | -30.50 | -8.77  | 615 |
| 2pt9 | 2.84 | 5.09 | -6.92  | -6.58  | 192 | 1jaq | 6.92 | 6.22 | -22.71 | -6.71  | 234 |
| 3amv | 7.57 | 5.33 | -6.33  | -6.96  | 167 | 3hhu | 4.15 | 4.85 | -8.21  | -6.11  | 216 |
| 2j9h | 7.17 | 4.93 | -6.37  | -6.40  | 239 | 3o6t | 4.77 | 5.47 | -8.96  | -6.92  | 199 |
| 3d52 | 2.39 | 4.63 | -9.30  | -5.70  | 310 | 3lxe | 7.20 | 7.90 | -11.26 | -10.15 | 319 |
| 3e16 | 7.52 | 9.76 | -14.36 | -12.50 | 423 | 3ccb | 6.08 | 5.38 | -12.46 | -6.48  | 364 |
| 2brp | 4.36 | 6.59 | -26.22 | -6.91  | 250 | 3k2f | 6.02 | 5.32 | -16.88 | -5.98  | 295 |
| 3n45 | 4.59 | 6.82 | -22.63 | -7.56  | 302 | 1c50 | 5.89 | 5.20 | -3.76  | -7.02  | 132 |
| 2p8n | 7.57 | 5.35 | -7.23  | -6.91  | 167 | 1wtg | 4.73 | 5.42 | -15.54 | -6.25  | 433 |
| 3f81 | 3.27 | 5.48 | -5.92  | -7.22  | 201 | 1k2v | 4.60 | 5.29 | -12.15 | -6.38  | 247 |
| 7kme | 7.95 | 5.74 | -13.40 | -6.89  | 338 | 2an5 | 7.14 | 7.83 | -10.46 | -10.13 | 280 |
| 1e72 | 7.70 | 5.49 | -16.65 | -6.23  | 278 | 1o46 | 3.72 | 4.41 | -10.41 | -5.29  | 512 |
| 3kjf | 2.30 | 4.51 | -6.35  | -5.80  | 251 | 1q4w | 6.24 | 5.55 | -16.97 | -6.29  | 252 |
| 1y2k | 3.98 | 6.18 | -16.95 | -7.19  | 466 | 1oe7 | 6.29 | 5.60 | -10.58 | -6.96  | 208 |
| 3hzk | 7.43 | 5.23 | -2.64  | -7.17  | 169 | 2ves | 7.10 | 6.41 | -21.59 | -7.09  | 266 |
| 3fck | 3.00 | 5.20 | -4.31  | -6.97  | 144 | 2w71 | 6.04 | 5.35 | -8.63  | -6.79  | 211 |
| 2xi7 | 4.16 | 6.35 | -14.74 | -7.64  | 318 | 3e9h | 7.77 | 8.46 | -29.46 | -9.25  | 750 |
| 3lka | 3.52 | 5.71 | -5.42  | -7.59  | 202 | 2r3o | 6.05 | 5.37 | -9.67  | -6.71  | 155 |
| 2vin | 5.92 | 3.73 | -5.99  | -4.73  | 267 | 2nq6 | 5.96 | 5.28 | -8.58  | -6.68  | 232 |
| 3ex2 | 5.15 | 7.34 | -7.72  | -9.69  | 158 | 3doz | 4.84 | 5.52 | -14.77 | -6.46  | 359 |
| 1zls | 6.00 | 8.19 | -25.39 | -9.25  | 522 | 1u59 | 7.74 | 7.06 | -15.05 | -8.61  | 408 |
| 1e34 | 3.52 | 5.70 | -11.07 | -7.05  | 290 | 1yxd | 6.08 | 6.76 | -17.70 | -7.94  | 269 |
| 2adu | 2.76 | 4.94 | -8.86  | -6.18  | 426 | 3kej | 7.32 | 8.00 | -26.10 | -8.92  | 439 |
| 1d6s | 7.27 | 9.45 | -40.16 | -9.67  | 644 | 1xpz | 4.35 | 3.67 | -5.67  | -4.68  | 346 |
| 2hwp | 6.92 | 9.10 | -33.54 | -9.79  | 607 | 3efk | 6.17 | 5.49 | -16.31 | -6.27  | 705 |
| 2p8h | 8.00 | 5.83 | -13.92 | -6.98  | 353 | 1uu3 | 6.92 | 6.24 | -24.33 | -6.59  | 370 |
| 1a86 | 2.82 | 4.98 | -7.45  | -6.37  | 130 | 2f7p | 7.22 | 6.54 | -19.54 | -7.46  | 315 |
| 1q6k | 5.39 | 7.55 | -16.72 | -9.15  | 461 | 1p5e | 6.89 | 6.22 | -10.13 | -7.87  | 227 |
| 1g42 | 4.07 | 6.23 | -13.06 | -7.61  | 194 | 2p8s | 7.46 | 6.79 | -21.38 | -7.64  | 343 |
| 3k3g | 4.33 | 6.49 | -16.95 | -7.62  | 313 | 2e9o | 4.00 | 4.67 | -5.05  | -6.15  | 194 |
| 2hds | 6.48 | 8.63 | -30.27 | -9.43  | 558 | luxa | 5.19 | 4.52 | -10.05 | -5.48  | 206 |
| 3fud | 7.89 | 5.74 | -13.03 | -6.93  | 359 | 1oiy | 6.74 | 6.07 | -13.65 | -7.34  | 212 |
| 2qk8 | 6.57 | 4.43 | -3.96  | -5.91  | 199 | 2o64 | 5.92 | 6.59 | -18.37 | -7.63  | 411 |
| 1a85 | 7.17 | 5.03 | -10.90 | -6.12  | 318 | 1m5d | 3.52 | 4.19 | -2.65  | -5.69  | 170 |

|      |      |      |        |        |     |      |      |      |        |       |     |
|------|------|------|--------|--------|-----|------|------|------|--------|-------|-----|
| 1o6i | 7.72 | 5.58 | -13.05 | -6.70  | 360 | 5upj | 4.92 | 4.25 | -9.45  | -5.15 | 255 |
| 8abp | 4.85 | 6.99 | -19.76 | -8.08  | 399 | 1we2 | 6.32 | 6.99 | -13.37 | -8.66 | 376 |
| 2f18 | 3.20 | 5.34 | -8.05  | -6.82  | 165 | 3e6k | 6.00 | 6.66 | -18.35 | -7.74 | 319 |
| 1uod | 3.23 | 5.37 | -11.04 | -6.59  | 238 | 2nnv | 5.89 | 5.23 | -3.36  | -7.10 | 159 |
| 1ft7 | 4.30 | 6.43 | -28.92 | -6.44  | 589 | 3eyh | 6.15 | 6.81 | -15.89 | -8.18 | 276 |
| 1kuk | 4.35 | 6.48 | -20.69 | -7.27  | 492 | 3gjt | 5.70 | 6.36 | -13.69 | -7.75 | 274 |
| 1juy | 6.77 | 4.64 | -7.27  | -5.90  | 376 | 2q11 | 4.82 | 5.48 | -12.08 | -6.65 | 500 |
| 3ipb | 3.65 | 5.78 | -10.59 | -7.21  | 349 | 1o35 | 6.57 | 7.23 | -23.04 | -8.11 | 443 |
| 2f70 | 6.61 | 8.74 | -18.50 | -10.67 | 381 | lyyy | 6.37 | 5.71 | -11.48 | -7.03 | 351 |
| 1uu7 | 4.57 | 6.70 | -13.84 | -8.21  | 350 | 3fpd | 7.21 | 7.87 | -23.52 | -8.97 | 311 |
| 1my8 | 7.70 | 5.58 | -10.26 | -6.95  | 213 | 2cm8 | 4.82 | 5.48 | -12.93 | -6.56 | 312 |
| 1p28 | 3.62 | 5.74 | -9.19  | -7.29  | 137 | 1cs4 | 5.89 | 5.24 | -13.02 | -6.22 | 346 |
| 2isw | 5.82 | 7.94 | -29.37 | -8.53  | 527 | 1exv | 7.72 | 8.37 | -22.29 | -9.80 | 644 |
| 2x95 | 5.30 | 7.42 | -17.16 | -8.92  | 334 | 1p05 | 3.84 | 4.49 | -3.08  | -6.08 | 125 |
| 2i72 | 4.07 | 6.19 | -15.18 | -7.36  | 481 | 2jkm | 7.35 | 6.70 | -23.09 | -7.35 | 461 |
| 1tqf | 7.74 | 5.63 | -14.51 | -6.63  | 449 | 2r3h | 4.30 | 4.95 | -5.53  | -6.50 | 196 |
| 1w7h | 3.67 | 5.78 | -6.19  | -7.62  | 179 | 2fda | 5.89 | 6.54 | -4.90  | -8.82 | 184 |
| 1e00 | 4.42 | 6.52 | -23.05 | -7.10  | 416 | 2pj6 | 6.89 | 6.24 | -21.28 | -6.87 | 397 |
| 2rkn | 6.48 | 8.58 | -30.32 | -9.35  | 429 | 2weg | 4.29 | 4.94 | -8.18  | -6.24 | 121 |
| 2qiq | 7.70 | 5.61 | -7.78  | -7.23  | 189 | 3ejs | 4.80 | 5.45 | -9.17  | -6.87 | 229 |
| 1way | 7.30 | 5.21 | -14.30 | -6.06  | 219 | 2x7t | 4.87 | 5.52 | -19.31 | -6.03 | 341 |
| 3mfv | 7.99 | 5.91 | -13.41 | -7.13  | 579 | 1z6q | 5.17 | 5.82 | -13.49 | -6.99 | 292 |
| 1kug | 3.30 | 5.38 | -8.34  | -6.86  | 207 | 1gmy | 5.42 | 6.06 | -16.70 | -7.05 | 490 |
| 1ing | 7.68 | 5.60 | -12.38 | -6.79  | 484 | 1k6t | 7.40 | 6.76 | -21.45 | -7.59 | 396 |
| 1kui | 2.00 | 4.08 | -3.33  | -5.47  | 194 | 3ine | 6.38 | 5.74 | -18.32 | -6.44 | 265 |
| 2who | 3.38 | 5.45 | -9.27  | -6.87  | 269 | 1f8b | 4.89 | 5.53 | -12.15 | -6.71 | 244 |
| 3hkn | 4.10 | 6.16 | -10.44 | -7.77  | 158 | 2x7u | 6.30 | 5.66 | -16.56 | -6.49 | 393 |
| 1wbg | 8.00 | 5.94 | -13.79 | -7.13  | 383 | 3dz4 | 7.10 | 6.46 | -22.28 | -7.09 | 416 |
| 1tyr | 6.33 | 8.39 | -34.85 | -8.66  | 505 | 1a4q | 7.72 | 7.08 | -18.90 | -8.29 | 455 |
| 1erq | 4.15 | 6.21 | -10.15 | -7.86  | 192 | 3nij | 7.64 | 7.00 | -23.85 | -7.71 | 287 |
| 1svh | 2.10 | 4.16 | -5.81  | -5.36  | 500 | 1ciz | 4.92 | 5.56 | -10.75 | -6.88 | 434 |
| 1pi4 | 2.92 | 4.97 | -8.02  | -6.30  | 293 | 3ehy | 6.64 | 6.00 | -12.78 | -7.32 | 320 |
| 1fsy | 7.30 | 5.25 | -12.32 | -6.30  | 360 | 2rfy | 7.00 | 6.36 | -21.37 | -7.04 | 357 |
| 2afw | 4.77 | 6.82 | -17.37 | -8.06  | 487 | 2dxs | 6.77 | 7.41 | -16.52 | -8.97 | 388 |
| 1los | 7.82 | 5.77 | -17.33 | -6.58  | 395 | 1o48 | 7.72 | 7.08 | -22.74 | -7.93 | 436 |
| 3fu6 | 2.75 | 4.80 | -2.63  | -6.55  | 107 | 2ima | 4.01 | 4.64 | -4.37  | -6.18 | 150 |
| 2w6z | 8.00 | 5.95 | -19.69 | -6.61  | 328 | 3kwa | 7.06 | 6.43 | -18.58 | -7.38 | 455 |
| 1o4q | 7.83 | 5.78 | -9.88  | -7.28  | 213 | 2bkt | 7.60 | 6.97 | -28.66 | -7.22 | 313 |
| 1zd3 | 4.17 | 6.21 | -12.87 | -7.61  | 165 | 2r3p | 6.73 | 7.36 | -21.08 | -8.48 | 548 |
| 1dg9 | 6.49 | 4.45 | -4.46  | -5.89  | 188 | 6apr | 5.92 | 5.29 | -10.72 | -6.50 | 207 |
| 1okl | 5.92 | 3.88 | -6.87  | -4.86  | 545 | 1y2g | 6.05 | 5.42 | -9.97  | -6.76 | 401 |
| 1no9 | 7.25 | 5.21 | -11.79 | -6.30  | 255 | 1a09 | 6.49 | 5.86 | -13.96 | -7.01 | 406 |
| 3ewc | 4.28 | 6.32 | -7.63  | -8.25  | 191 | 2clx | 6.82 | 6.19 | -22.75 | -6.66 | 220 |
| 2x8z | 4.15 | 6.19 | -16.73 | -7.22  | 408 | 3ivh | 6.66 | 7.29 | -24.58 | -8.05 | 494 |
| 1wbs | 3.00 | 5.03 | -10.28 | -6.18  | 105 | 2ze1 | 7.38 | 6.75 | -23.75 | -7.37 | 413 |

|      |      |      |        |        |     |      |      |      |        |       |     |
|------|------|------|--------|--------|-----|------|------|------|--------|-------|-----|
| 5fiv | 3.92 | 5.95 | -12.39 | -7.29  | 149 | 3moe | 4.51 | 3.88 | -6.81  | -4.87 | 222 |
| 3hvg | 7.39 | 5.36 | -9.69  | -6.70  | 300 | 1fsg | 7.60 | 6.97 | -19.73 | -8.06 | 604 |
| 2uwg | 4.96 | 6.99 | -18.73 | -8.17  | 329 | 7gch | 6.30 | 6.93 | -18.56 | -8.09 | 323 |
| 1t49 | 3.70 | 5.73 | -17.00 | -6.55  | 392 | 3fcf | 6.17 | 6.79 | -23.39 | -7.46 | 290 |
| 3lnk | 5.85 | 7.88 | -29.57 | -8.42  | 427 | 1z6p | 6.74 | 7.36 | -20.91 | -8.50 | 735 |
| 2oz2 | 3.70 | 5.73 | -11.27 | -7.07  | 343 | 2x8i | 5.51 | 4.89 | -10.31 | -5.97 | 294 |
| 1mm7 | 6.19 | 8.21 | -14.36 | -10.31 | 243 | 1k6c | 7.20 | 7.82 | -24.33 | -8.83 | 330 |
| 3fu3 | 3.05 | 5.07 | -5.51  | -6.68  | 133 | 3jpv | 8.00 | 8.62 | -34.32 | -9.03 | 564 |
| 3ixg | 3.40 | 5.42 | -3.33  | -7.38  | 216 | 1m2x | 4.00 | 4.62 | -6.31  | -5.96 | 359 |
| 2evo | 4.43 | 6.45 | -17.88 | -7.48  | 418 | 1pxi | 7.17 | 6.55 | -17.11 | -7.70 | 409 |
| 1f73 | 3.70 | 5.72 | -11.61 | -7.03  | 194 | 2pow | 6.70 | 7.31 | -25.31 | -8.02 | 603 |
| 2c6c | 3.18 | 5.20 | -6.78  | -6.74  | 150 | 3kaf | 5.46 | 6.07 | -12.91 | -7.41 | 228 |
| 1wbw | 5.77 | 7.78 | -16.39 | -9.51  | 332 | 1xlz | 6.66 | 7.27 | -20.78 | -8.38 | 507 |
| 2c69 | 6.07 | 8.08 | -30.70 | -8.60  | 471 | 3e0q | 5.18 | 4.57 | -6.56  | -5.86 | 211 |
| 1c3b | 6.17 | 8.18 | -26.02 | -9.18  | 528 | 1v2p | 5.47 | 6.08 | -19.32 | -6.83 | 540 |
| 1axr | 6.85 | 4.84 | -10.70 | -5.87  | 232 | 2w6q | 6.52 | 5.91 | -24.83 | -6.07 | 760 |
| 3fmq | 2.82 | 4.83 | -6.43  | -6.25  | 180 | 3ffp | 7.89 | 8.50 | -26.04 | -9.63 | 714 |
| 1qpe | 3.81 | 5.82 | -5.32  | -7.75  | 225 | 2r23 | 4.09 | 4.70 | -8.90  | -5.84 | 287 |
| 1inh | 3.21 | 5.22 | -3.21  | -7.09  | 170 | 1tow | 5.51 | 6.12 | -16.06 | -7.18 | 246 |
| 2uup | 7.68 | 5.68 | -8.67  | -7.24  | 227 | 2ael | 7.06 | 7.67 | -25.98 | -8.46 | 268 |
| 2isv | 2.92 | 4.91 | -11.22 | -5.92  | 444 | 1vrt | 7.00 | 6.39 | -16.73 | -7.51 | 300 |
| 2vtm | 7.90 | 5.91 | -16.03 | -6.89  | 383 | 2vcq | 7.64 | 7.03 | -25.71 | -7.59 | 399 |
| 3d3x | 4.30 | 6.29 | -18.51 | -7.19  | 296 | 5apr | 7.52 | 6.92 | -12.95 | -8.60 | 646 |
| 1o4d | 3.77 | 5.76 | -13.34 | -6.92  | 322 | 1eoc | 5.82 | 5.22 | -7.14  | -6.73 | 212 |
| 3hyf | 5.15 | 7.13 | -18.93 | -8.36  | 558 | 2q92 | 6.85 | 6.25 | -18.05 | -7.18 | 459 |
| 2afx | 5.77 | 7.75 | -31.11 | -8.11  | 514 | 1uyh | 7.40 | 6.80 | -23.44 | -7.46 | 623 |
| 2z97 | 4.07 | 6.05 | -16.10 | -7.08  | 484 | 1x70 | 6.66 | 6.06 | -19.56 | -6.78 | 325 |
| 2vw1 | 7.18 | 5.20 | -11.84 | -6.27  | 360 | 1sri | 6.40 | 5.80 | -20.64 | -6.31 | 354 |
| 1ny2 | 4.46 | 6.44 | -21.08 | -7.17  | 466 | 3nnu | 5.41 | 6.01 | -17.04 | -6.93 | 398 |
| 2igx | 6.70 | 4.73 | -10.36 | -5.74  | 220 | 1yfz | 6.30 | 6.90 | -15.56 | -8.33 | 278 |
| 3lpj | 5.27 | 7.24 | -24.35 | -8.00  | 314 | 1okv | 6.52 | 7.12 | -11.72 | -9.00 | 257 |
| 2vvs | 6.60 | 8.57 | -26.10 | -9.73  | 567 | 3e7o | 5.82 | 6.41 | -10.19 | -8.15 | 228 |
| 1czc | 7.92 | 5.95 | -13.45 | -7.19  | 278 | 1fvt | 7.85 | 7.26 | -18.10 | -8.61 | 524 |
| 3fc8 | 7.55 | 5.58 | -10.59 | -6.93  | 417 | 1qhr | 7.82 | 7.23 | -3.40  | -9.94 | 153 |
| 1wax | 6.70 | 8.67 | -29.84 | -9.52  | 558 | 1e9h | 8.00 | 7.41 | -22.15 | -8.45 | 460 |
| 2uze | 5.72 | 7.69 | -23.18 | -8.75  | 685 | 1gfz | 7.89 | 7.30 | -28.23 | -7.73 | 473 |
| 2oz5 | 4.95 | 6.92 | -14.60 | -8.45  | 301 | 2c5o | 5.92 | 5.33 | -10.48 | -6.59 | 262 |
| 3e3u | 6.08 | 8.04 | -23.91 | -9.18  | 489 | 2pax | 7.96 | 8.54 | -32.22 | -9.12 | 611 |
| 1wva | 7.00 | 5.04 | -6.71  | -6.53  | 151 | 1qf2 | 7.52 | 6.94 | -16.96 | -8.26 | 456 |
| 1p02 | 2.62 | 4.58 | -6.26  | -5.90  | 116 | 3mfw | 6.86 | 6.28 | -13.94 | -7.60 | 343 |
| 1yk7 | 5.53 | 7.48 | -22.42 | -8.53  | 439 | 3dgq | 5.70 | 5.12 | -12.36 | -6.11 | 239 |
| 3d7d | 6.54 | 8.49 | -22.85 | -9.92  | 445 | 2uyi | 7.30 | 6.72 | -17.48 | -7.90 | 455 |
| 2w0x | 7.24 | 9.19 | -25.52 | -10.66 | 540 | 2r3i | 7.03 | 7.61 | -21.07 | -8.83 | 370 |
| 1px4 | 6.03 | 7.96 | -22.82 | -9.17  | 493 | 3bg8 | 7.19 | 7.77 | -30.47 | -8.19 | 463 |
| 2q7y | 6.72 | 8.65 | -26.52 | -9.80  | 364 | 1cw2 | 6.83 | 6.25 | -18.82 | -7.11 | 320 |

|      |      |      |        |        |     |      |      |      |        |        |     |
|------|------|------|--------|--------|-----|------|------|------|--------|--------|-----|
| 3feg | 3.96 | 5.89 | -14.11 | -7.04  | 336 | 2x7c | 6.43 | 5.85 | -9.41  | -7.42  | 271 |
| 3evf | 3.15 | 5.08 | -5.81  | -6.66  | 202 | 1njt | 5.05 | 5.63 | -11.30 | -6.93  | 252 |
| 1b9v | 8.00 | 6.08 | -9.21  | -7.76  | 452 | 3il6 | 4.89 | 5.47 | -13.45 | -6.50  | 568 |
| 3f7u | 7.85 | 5.93 | -18.20 | -6.72  | 277 | 3o88 | 7.09 | 6.51 | -16.95 | -7.66  | 346 |
| 2uzo | 4.66 | 6.58 | -10.15 | -8.38  | 267 | 2wo9 | 6.82 | 6.24 | -14.83 | -7.48  | 373 |
| 1m5e | 3.89 | 5.81 | -12.62 | -7.06  | 165 | 3h0v | 5.54 | 6.12 | -19.43 | -6.87  | 417 |
| 3pcc | 7.52 | 9.44 | -32.26 | -10.38 | 534 | 3fci | 4.72 | 5.29 | -6.87  | -6.87  | 235 |
| 3fzs | 7.55 | 5.64 | -12.39 | -6.84  | 250 | 2pjb | 7.94 | 7.37 | -24.28 | -8.19  | 392 |
| 1g9a | 7.96 | 6.05 | -19.29 | -6.79  | 342 | 1bky | 6.80 | 7.37 | -18.98 | -8.69  | 533 |
| 2x5o | 3.81 | 5.72 | -3.72  | -7.76  | 89  | 2wih | 7.63 | 7.06 | -12.96 | -8.80  | 291 |
| 1d8f | 3.72 | 5.63 | -5.31  | -7.48  | 147 | 1rs2 | 7.00 | 7.57 | -23.87 | -8.52  | 628 |
| 3h2n | 4.00 | 5.91 | -18.74 | -6.63  | 371 | 2eg7 | 6.20 | 6.77 | -21.52 | -7.60  | 375 |
| 1h00 | 7.39 | 5.49 | -19.74 | -5.94  | 470 | 2x38 | 5.80 | 5.23 | -15.58 | -5.97  | 473 |
| 2hz0 | 7.00 | 5.10 | -8.67  | -6.42  | 328 | 1v2m | 5.74 | 6.31 | -17.01 | -7.36  | 319 |
| 1mm6 | 7.77 | 5.87 | -14.60 | -6.97  | 305 | 1qxy | 3.64 | 4.21 | -1.77  | -5.80  | 123 |
| 1nhg | 6.29 | 4.39 | -3.96  | -5.86  | 176 | 2cgu | 7.00 | 6.43 | -18.22 | -7.43  | 275 |
| 1mf4 | 5.82 | 7.71 | -8.31  | -10.16 | 166 | 1q0b | 6.25 | 6.82 | -20.32 | -7.78  | 368 |
| 2vw2 | 6.77 | 8.66 | -37.41 | -8.80  | 495 | 1xot | 7.00 | 6.44 | -21.97 | -7.08  | 414 |
| 1j07 | 5.30 | 7.19 | -17.29 | -8.58  | 334 | 2vwx | 5.00 | 4.44 | -9.07  | -5.45  | 321 |
| 3g2y | 4.85 | 6.73 | -19.23 | -7.76  | 460 | 1xm6 | 7.70 | 8.26 | -29.54 | -8.97  | 710 |
| 1z34 | 4.64 | 6.52 | -14.67 | -7.89  | 424 | 1h0w | 7.96 | 8.52 | -21.32 | -10.11 | 515 |
| 2uw3 | 5.32 | 7.20 | -18.92 | -8.45  | 510 | 2vgo | 7.68 | 7.12 | -26.90 | -7.59  | 541 |
| 1g2a | 4.82 | 6.70 | -8.66  | -8.70  | 206 | 2vle | 7.04 | 7.60 | -7.50  | -10.08 | 251 |
| 3hv3 | 6.74 | 8.62 | -30.91 | -9.35  | 493 | 3c43 | 5.42 | 5.98 | -17.18 | -6.89  | 344 |
| 3d51 | 3.70 | 5.58 | -18.69 | -6.17  | 382 | 1vjy | 6.96 | 6.40 | -24.27 | -6.82  | 385 |
| 1njj | 4.08 | 5.96 | -12.09 | -7.32  | 270 | 3chd | 5.96 | 5.40 | -12.90 | -6.46  | 360 |
| 1o4k | 3.43 | 5.30 | -9.08  | -6.68  | 264 | 2wi6 | 7.06 | 6.50 | -14.80 | -7.84  | 336 |
| 6lpr | 2.57 | 4.44 | -4.17  | -5.91  | 194 | 1yvf | 7.52 | 6.96 | -25.58 | -7.49  | 400 |
| 2qn1 | 7.77 | 5.90 | -12.54 | -7.20  | 411 | 2piz | 5.91 | 6.47 | -21.69 | -7.16  | 376 |
| 3dz6 | 4.42 | 6.29 | -16.13 | -7.41  | 277 | 3g9e | 7.37 | 7.93 | -18.33 | -9.54  | 314 |
| 1rql | 5.98 | 7.85 | -28.69 | -8.46  | 424 | 1b42 | 4.60 | 5.16 | -7.82  | -6.59  | 233 |
| 2wev | 6.47 | 8.33 | -33.62 | -8.69  | 444 | 2q8g | 7.22 | 7.78 | -4.17  | -10.64 | 131 |
| 1m5f | 3.84 | 5.70 | -8.14  | -7.32  | 121 | 3hmm | 6.68 | 7.24 | -23.41 | -8.08  | 340 |
| 1mns | 4.89 | 6.75 | -10.65 | -8.58  | 200 | 2cma | 4.08 | 4.64 | -4.19  | -6.18  | 138 |
| 1fsw | 2.44 | 4.30 | -5.24  | -5.60  | 248 | 1vgc | 4.68 | 5.23 | -8.43  | -6.64  | 121 |
| 1ule | 5.94 | 7.79 | -21.90 | -9.01  | 281 | 1llb | 6.71 | 7.26 | -25.14 | -7.96  | 345 |
| 1y2h | 5.55 | 7.40 | -20.81 | -8.56  | 491 | 2h02 | 5.70 | 5.15 | -9.62  | -6.40  | 288 |
| 3i4a | 7.89 | 6.04 | -13.20 | -7.34  | 295 | 1pmv | 6.29 | 5.74 | -13.25 | -6.90  | 304 |
| 1q91 | 3.80 | 5.65 | -2.96  | -7.73  | 167 | 2c8x | 6.18 | 6.73 | -20.73 | -7.62  | 316 |
| 1wbo | 4.10 | 5.95 | -8.38  | -7.65  | 347 | 2np8 | 6.59 | 6.04 | -16.78 | -7.00  | 348 |
| 1ahx | 6.82 | 4.97 | -10.73 | -6.05  | 263 | 1zkn | 5.88 | 5.33 | -12.47 | -6.40  | 408 |
| 1xoe | 6.82 | 4.97 | -10.52 | -6.08  | 236 | 3ig6 | 6.23 | 6.78 | -16.54 | -8.08  | 405 |
| 1gj5 | 4.60 | 6.44 | -16.17 | -7.63  | 304 | 2r3f | 6.72 | 6.17 | -7.51  | -8.05  | 322 |
| 1uye | 6.03 | 4.20 | -11.20 | -4.91  | 185 | 3hp2 | 6.05 | 6.60 | -15.56 | -7.91  | 353 |
| 1utz | 7.15 | 5.32 | -9.14  | -6.69  | 244 | 1tmb | 6.54 | 5.99 | -14.18 | -7.18  | 227 |

|      |      |      |        |        |     |      |      |      |        |        |     |
|------|------|------|--------|--------|-----|------|------|------|--------|--------|-----|
| 1e37 | 7.10 | 5.27 | -9.48  | -6.59  | 502 | 2gc8 | 6.15 | 6.70 | -18.13 | -7.81  | 286 |
| 1iy7 | 3.87 | 5.70 | -13.23 | -6.85  | 384 | 2g8n | 6.10 | 6.65 | -23.18 | -7.27  | 410 |
| 1gzg | 6.00 | 7.83 | -16.51 | -9.56  | 453 | 2p4i | 7.90 | 8.45 | -28.48 | -9.33  | 517 |
| 1jt1 | 2.70 | 4.53 | -4.39  | -6.01  | 136 | 1tlo | 4.49 | 5.03 | -5.84  | -6.60  | 222 |
| 2f6v | 8.00 | 6.17 | -17.98 | -7.08  | 300 | 2doo | 4.67 | 5.21 | -9.48  | -6.51  | 187 |
| 2bjm | 6.70 | 8.52 | -21.99 | -10.04 | 545 | 1xdd | 7.82 | 7.28 | -20.17 | -8.44  | 698 |
| 2wik | 3.91 | 5.73 | -16.29 | -6.61  | 466 | 1nnk | 6.15 | 5.61 | -13.41 | -6.70  | 390 |
| 1jj9 | 6.40 | 4.59 | -11.21 | -5.46  | 474 | 3iej | 6.36 | 6.90 | -15.83 | -8.32  | 451 |
| 3h0q | 6.74 | 8.55 | -15.94 | -10.64 | 416 | 2p9a | 6.80 | 6.26 | -23.71 | -6.67  | 504 |
| 3bkl | 3.48 | 5.29 | -8.26  | -6.73  | 157 | 1g7f | 4.91 | 5.45 | -13.23 | -6.50  | 289 |
| 2vgp | 4.44 | 6.25 | -7.95  | -8.12  | 322 | 1esz | 7.12 | 7.66 | -10.49 | -9.89  | 262 |
| 2a3a | 6.55 | 4.74 | -4.17  | -6.33  | 222 | 2f3k | 6.85 | 6.31 | -15.14 | -7.54  | 350 |
| 3lce | 2.84 | 4.65 | -2.61  | -6.35  | 153 | 3chc | 6.09 | 5.55 | -7.20  | -7.20  | 146 |
| 6tim | 3.40 | 5.21 | -16.73 | -5.83  | 665 | 3vgc | 5.96 | 5.42 | -17.71 | -6.04  | 399 |
| 2vcx | 6.80 | 5.00 | -12.65 | -5.91  | 259 | 3fh5 | 6.52 | 5.98 | -12.96 | -7.28  | 412 |
| 1eef | 8.00 | 6.20 | -12.79 | -7.60  | 316 | 2r3k | 7.42 | 7.96 | -10.15 | -10.34 | 258 |
| 3hha | 7.24 | 9.03 | -25.04 | -10.48 | 540 | 2in6 | 6.73 | 7.27 | -25.44 | -7.94  | 413 |
| 3n46 | 3.15 | 4.94 | -5.82  | -6.47  | 202 | 1zom | 4.80 | 4.27 | -10.10 | -5.11  | 462 |
| 1mpl | 2.96 | 4.75 | -3.85  | -6.38  | 102 | 2vtr | 6.30 | 6.83 | -14.64 | -8.33  | 456 |
| 2o5d | 5.68 | 3.89 | -11.61 | -4.43  | 387 | 3h3c | 5.64 | 6.17 | -10.12 | -7.81  | 300 |
| 2h44 | 7.66 | 5.87 | -17.31 | -6.71  | 455 | 1hkk | 7.52 | 6.99 | -23.23 | -7.75  | 445 |
| 2vtd | 3.07 | 4.85 | -3.25  | -6.58  | 88  | 2c5n | 2.24 | 2.77 | -2.29  | -3.72  | 180 |
| 7lpr | 3.90 | 5.68 | -12.20 | -6.92  | 290 | 2a4l | 4.00 | 4.53 | -10.28 | -5.47  | 295 |
| 1v1k | 5.02 | 6.79 | -15.91 | -8.15  | 510 | 3kai | 7.18 | 6.65 | -21.70 | -7.41  | 386 |
| 1ke3 | 3.20 | 4.97 | -8.19  | -6.29  | 174 | 1c9d | 6.05 | 6.58 | -9.95  | -8.41  | 392 |
| 3chp | 7.92 | 6.15 | -23.54 | -6.54  | 401 | 2nn7 | 7.35 | 6.82 | -21.89 | -7.64  | 489 |
| 1ad8 | 3.70 | 5.47 | -17.70 | -6.11  | 371 | 2nn1 | 4.07 | 4.60 | -3.12  | -6.23  | 125 |
| 3fz1 | 7.60 | 5.83 | -13.40 | -7.03  | 308 | 3e51 | 6.92 | 6.39 | -8.75  | -8.25  | 358 |
| 1w10 | 2.72 | 4.48 | -3.06  | -6.07  | 151 | 2pu0 | 5.25 | 5.78 | -15.97 | -6.71  | 758 |
| 2is0 | 7.93 | 6.17 | -4.57  | -8.32  | 237 | 1ypg | 5.70 | 5.17 | -14.33 | -6.00  | 235 |
| 2hob | 6.57 | 4.81 | -10.46 | -5.85  | 318 | 1ywr | 7.05 | 7.58 | -28.59 | -8.09  | 454 |
| 2gh6 | 6.92 | 8.68 | -32.27 | -9.31  | 672 | 1yms | 6.62 | 6.09 | -13.04 | -7.43  | 360 |
| 3bkk | 4.77 | 6.53 | -14.38 | -7.92  | 284 | 2p83 | 5.10 | 5.62 | -16.96 | -6.40  | 361 |
| 2gyi | 4.62 | 6.37 | -9.11  | -8.19  | 350 | 1mmq | 6.60 | 6.08 | -9.79  | -7.70  | 244 |
| 1cze | 4.82 | 6.57 | -11.88 | -8.21  | 178 | 2vd1 | 5.15 | 5.67 | -15.05 | -6.65  | 567 |
| 1szm | 2.69 | 4.44 | -6.46  | -5.69  | 261 | 3n5h | 7.86 | 7.34 | -25.76 | -8.01  | 212 |
| 3b8z | 4.12 | 5.87 | -16.99 | -6.74  | 311 | 1nqc | 2.46 | 2.98 | -2.87  | -3.96  | 172 |
| 3dpe | 4.96 | 6.70 | -16.43 | -7.98  | 402 | 3hyg | 4.52 | 5.04 | -10.09 | -6.21  | 268 |
| 1os0 | 5.36 | 7.10 | -10.12 | -9.13  | 201 | 3ips | 5.22 | 4.70 | -10.36 | -5.70  | 239 |
| 3fun | 3.36 | 5.10 | -4.24  | -6.84  | 181 | 2gnh | 6.98 | 6.46 | -14.79 | -7.79  | 415 |
| 1mrs | 2.54 | 4.28 | -6.00  | -5.51  | 87  | 2q94 | 5.80 | 6.32 | -18.34 | -7.25  | 209 |
| 1noj | 4.62 | 6.35 | -9.58  | -8.11  | 366 | 1fkw | 6.15 | 6.67 | -19.96 | -7.60  | 397 |
| 1nc6 | 5.64 | 7.36 | -28.99 | -7.75  | 477 | 1z6f | 7.08 | 6.56 | -16.74 | -7.75  | 329 |
| 2x8e | 6.21 | 7.93 | -25.87 | -8.84  | 499 | 2wd1 | 6.68 | 7.20 | -24.88 | -7.89  | 424 |
| 3ddf | 3.05 | 4.77 | -8.86  | -5.94  | 187 | 1o37 | 6.62 | 6.10 | -18.05 | -6.98  | 394 |

|      |      |      |        |       |     |      |      |      |        |       |     |
|------|------|------|--------|-------|-----|------|------|------|--------|-------|-----|
| 2ctc | 7.74 | 6.02 | -9.36  | -7.67 | 427 | 3daj | 7.80 | 7.28 | -17.12 | -8.74 | 435 |
| 2zmj | 6.35 | 8.07 | -22.21 | -9.37 | 548 | 1qxz | 7.89 | 7.37 | -24.40 | -8.19 | 550 |
| 1v0n | 5.68 | 3.97 | -9.50  | -4.74 | 237 | 3hqy | 6.60 | 6.09 | -18.48 | -6.91 | 308 |
| 1xom | 5.64 | 3.93 | -4.48  | -5.15 | 266 | 2xhm | 5.82 | 6.33 | -25.42 | -6.62 | 304 |
| 2o9a | 5.87 | 7.58 | -27.43 | -8.20 | 471 | 1c1r | 5.70 | 6.21 | -7.87  | -8.08 | 322 |
| 4tln | 5.11 | 6.82 | -15.00 | -8.28 | 420 | 2zu5 | 6.48 | 5.97 | -18.72 | -6.72 | 275 |
| 2c8y | 6.92 | 5.21 | -15.36 | -5.96 | 291 | 3h0s | 6.05 | 5.54 | -16.63 | -6.31 | 286 |
| 3fqs | 3.30 | 5.01 | -3.65  | -6.76 | 131 | 1jlx | 7.51 | 7.00 | -19.83 | -8.08 | 350 |
| 3kx1 | 6.15 | 4.44 | -10.70 | -5.31 | 170 | 2flb | 7.19 | 6.68 | -13.69 | -8.20 | 451 |
| 3d7g | 3.16 | 4.87 | -9.59  | -6.01 | 222 | 2rk8 | 4.76 | 4.25 | -5.54  | -5.51 | 277 |
| 3kv2 | 4.70 | 6.40 | -14.60 | -7.72 | 467 | 1unh | 6.54 | 6.03 | -9.62  | -7.66 | 255 |
| 3b7i | 5.52 | 3.82 | -8.29  | -4.64 | 237 | 1wzy | 6.75 | 7.26 | -20.92 | -8.35 | 420 |
| 2hyy | 3.55 | 5.25 | -11.53 | -6.37 | 209 | 3g15 | 6.64 | 6.13 | -17.87 | -7.04 | 304 |
| 1g9b | 6.17 | 4.47 | -14.09 | -5.03 | 592 | 1kr3 | 7.60 | 7.10 | -29.53 | -7.32 | 352 |
| 1n51 | 3.13 | 4.83 | -9.92  | -5.92 | 189 | 3n7s | 6.70 | 7.20 | -27.35 | -7.67 | 468 |
| 2z3h | 7.46 | 5.76 | -16.73 | -6.62 | 344 | 3iww | 4.90 | 5.40 | -15.21 | -6.25 | 302 |
| 2f6z | 6.13 | 7.82 | -18.50 | -9.38 | 423 | 3c7q | 7.72 | 8.22 | -35.95 | -8.31 | 429 |
| 2hb9 | 7.01 | 8.70 | -30.94 | -9.46 | 536 | 3mtw | 3.72 | 4.22 | -14.14 | -4.67 | 342 |
| 2vj9 | 4.68 | 6.37 | -16.91 | -7.46 | 442 | 1nu8 | 6.70 | 7.20 | -22.89 | -8.08 | 322 |
| 1uyd | 7.96 | 6.27 | -16.95 | -7.32 | 323 | 2ojf | 5.04 | 5.54 | -14.76 | -6.48 | 314 |
| 3f8w | 4.74 | 6.42 | -7.60  | -8.40 | 340 | 3lpr | 7.70 | 7.20 | -19.89 | -8.37 | 464 |
| 1kti | 3.30 | 4.98 | -6.02  | -6.50 | 246 | 3k3h | 4.89 | 5.38 | -9.45  | -6.75 | 206 |
| 2wq4 | 7.92 | 6.24 | -19.27 | -7.06 | 386 | 3mpm | 7.21 | 7.70 | -17.78 | -9.27 | 531 |
| 3kwb | 3.18 | 4.85 | -7.98  | -6.14 | 291 | 3jzk | 7.30 | 6.81 | -15.10 | -8.25 | 513 |
| 1tjp | 7.30 | 5.63 | -22.16 | -5.92 | 287 | 2aw1 | 4.70 | 5.19 | -6.51  | -6.76 | 265 |
| 3ezv | 5.19 | 6.86 | -17.87 | -8.07 | 592 | 2jaj | 6.62 | 6.13 | -22.77 | -6.58 | 407 |
| 1wbt | 5.72 | 7.39 | -24.58 | -8.19 | 275 | 1lan | 6.82 | 7.31 | -26.02 | -7.95 | 475 |
| 1j15 | 7.84 | 6.18 | -13.71 | -7.48 | 466 | 3fhr | 5.82 | 5.33 | -7.24  | -6.88 | 164 |
| 3d4z | 6.70 | 5.04 | -14.93 | -5.76 | 281 | 2rke | 5.09 | 4.60 | -8.09  | -5.77 | 222 |
| 1o4h | 8.00 | 6.34 | -12.41 | -7.83 | 284 | 1c5p | 5.82 | 5.33 | -11.68 | -6.47 | 223 |
| 2woa | 3.26 | 4.92 | -3.09  | -6.69 | 168 | 1w82 | 6.55 | 6.06 | -15.85 | -7.12 | 753 |
| 3fkt | 3.05 | 4.71 | -5.17  | -6.20 | 232 | 2bw7 | 5.15 | 5.64 | -16.45 | -6.47 | 433 |
| 1v79 | 5.00 | 6.65 | -18.07 | -7.76 | 318 | 3g3n | 6.19 | 5.70 | -21.38 | -6.10 | 370 |
| 2ggd | 3.30 | 4.95 | -8.37  | -6.24 | 222 | 2vti | 5.80 | 5.31 | -8.60  | -6.73 | 427 |
| 3ewz | 5.77 | 7.42 | -19.40 | -8.72 | 349 | 2byh | 7.39 | 6.90 | -12.60 | -8.61 | 322 |
| 3kb3 | 6.46 | 8.11 | -35.69 | -8.18 | 496 | 3kjq | 7.46 | 6.97 | -23.03 | -7.75 | 500 |
| 1tr7 | 5.30 | 6.95 | -16.02 | -8.36 | 156 | 2qu3 | 6.41 | 6.90 | -11.12 | -8.74 | 268 |
| 2ohq | 4.00 | 5.64 | -7.68  | -7.29 | 321 | 2zz6 | 5.70 | 5.22 | -12.07 | -6.27 | 360 |
| 1n8u | 7.40 | 9.04 | -33.32 | -9.73 | 569 | 2wi5 | 7.72 | 8.20 | -29.15 | -8.92 | 502 |
| 1dm2 | 6.30 | 7.94 | -25.10 | -8.93 | 373 | 1vyz | 6.92 | 6.44 | -11.04 | -8.10 | 245 |
| 2fou | 6.70 | 5.07 | -7.43  | -6.49 | 232 | 1w6r | 4.77 | 4.29 | -2.87  | -5.81 | 88  |
| 2f6y | 4.62 | 6.25 | -18.37 | -7.16 | 354 | 2vwz | 7.32 | 7.80 | -20.93 | -9.12 | 379 |
| 2am1 | 4.46 | 6.09 | -18.67 | -6.90 | 222 | 3k22 | 5.18 | 4.70 | -10.45 | -5.69 | 312 |
| 1tc1 | 5.30 | 6.93 | -24.29 | -7.56 | 484 | 3h26 | 6.38 | 6.86 | -18.69 | -7.99 | 419 |
| 2r3j | 3.33 | 4.95 | -6.80  | -6.39 | 184 | 2w6m | 7.24 | 7.72 | -31.85 | -7.98 | 442 |

|      |      |      |        |       |     |      |      |      |        |        |     |
|------|------|------|--------|-------|-----|------|------|------|--------|--------|-----|
| 2ow0 | 4.25 | 5.87 | -9.04  | -7.49 | 220 | 2a4r | 6.40 | 6.88 | -10.43 | -8.78  | 228 |
| 2vte | 4.70 | 6.32 | -18.41 | -7.25 | 343 | 1tsl | 6.00 | 6.47 | -18.82 | -7.43  | 323 |
| 1a07 | 5.96 | 4.34 | -4.28  | -5.76 | 138 | 2owb | 7.70 | 8.17 | -26.65 | -9.11  | 328 |
| 3m67 | 5.30 | 6.92 | -16.85 | -8.24 | 334 | 3mbp | 6.80 | 6.33 | -13.61 | -7.71  | 268 |
| 2e90 | 7.82 | 6.21 | -16.09 | -7.30 | 543 | 3lpt | 7.82 | 7.35 | -3.33  | -10.11 | 153 |
| 3ex3 | 7.15 | 5.54 | -5.62  | -7.33 | 241 | 2pov | 5.40 | 5.87 | -9.10  | -7.47  | 148 |
| 1yda | 3.05 | 4.66 | -5.21  | -6.13 | 180 | 2vtq | 4.82 | 5.29 | -15.09 | -6.09  | 325 |
| 3moh | 7.69 | 6.08 | -19.72 | -6.79 | 447 | 1ftj | 4.57 | 5.03 | -13.02 | -5.93  | 298 |
| 3jzh | 7.51 | 5.90 | -9.75  | -7.47 | 272 | 3fy0 | 6.89 | 6.43 | -16.46 | -7.58  | 488 |
| 1y2e | 4.01 | 5.61 | -12.16 | -6.83 | 187 | 2gz7 | 6.00 | 5.54 | -11.82 | -6.75  | 252 |
| 1rmz | 7.91 | 6.31 | -17.71 | -7.30 | 533 | 2pou | 7.00 | 7.46 | -25.43 | -8.22  | 481 |
| 3dpf | 7.46 | 5.86 | -21.07 | -6.35 | 328 | 2q8s | 5.82 | 5.36 | -18.02 | -5.92  | 310 |
| 1nok | 7.70 | 6.10 | -24.12 | -6.41 | 237 | 3bpc | 7.07 | 7.53 | -11.44 | -9.61  | 366 |
| 2br6 | 7.63 | 6.04 | -8.70  | -7.75 | 217 | 1c7e | 7.32 | 6.86 | -20.41 | -7.83  | 377 |
| 1oxn | 7.48 | 5.89 | -15.39 | -6.92 | 406 | 1y3y | 6.35 | 6.81 | -19.89 | -7.81  | 361 |
| 2az9 | 5.05 | 6.64 | -18.49 | -7.70 | 413 | 1uml | 4.92 | 5.38 | -9.97  | -6.70  | 193 |
| 3mof | 4.64 | 6.23 | -20.60 | -6.92 | 612 | 1rdl | 6.32 | 5.86 | -16.48 | -6.78  | 298 |
| 1exw | 4.06 | 5.65 | -4.92  | -7.55 | 180 | 3ijh | 6.46 | 6.91 | -25.14 | -7.47  | 376 |
| 4est | 7.00 | 8.59 | -37.56 | -8.69 | 495 | 3bl9 | 5.96 | 6.41 | -8.05  | -8.34  | 340 |
| 3kab | 7.85 | 6.27 | -11.37 | -7.83 | 479 | 2zoq | 6.14 | 6.59 | -15.91 | -7.86  | 387 |
| 2ovv | 6.52 | 8.10 | -17.50 | -9.86 | 618 | 2g9x | 4.74 | 5.19 | -10.40 | -6.39  | 153 |
| 1uy6 | 6.57 | 4.99 | -12.40 | -5.92 | 244 | 3mct | 5.14 | 5.59 | -7.45  | -7.23  | 356 |
| 3kr4 | 4.52 | 6.10 | -14.14 | -7.34 | 230 | 2foy | 5.64 | 5.19 | -8.38  | -6.58  | 399 |
| 2rkd | 4.11 | 5.69 | -15.09 | -6.67 | 209 | 1okw | 7.42 | 6.97 | -21.70 | -7.87  | 330 |
| 3daz | 7.70 | 6.12 | -14.27 | -7.35 | 297 | 2o3z | 5.92 | 6.37 | -16.59 | -7.48  | 323 |
| 5lpr | 5.22 | 6.80 | -9.77  | -8.73 | 193 | 2wxo | 5.85 | 6.30 | -19.79 | -7.09  | 396 |
| 1k6v | 7.49 | 5.91 | -22.52 | -6.29 | 420 | 3aav | 6.54 | 6.98 | -10.60 | -8.92  | 155 |
| 1h62 | 5.00 | 3.43 | -2.82  | -4.60 | 320 | 3bxs | 6.11 | 5.67 | -21.80 | -6.01  | 318 |
| 3ewu | 4.57 | 6.14 | -13.06 | -7.49 | 328 | 1kwr | 5.10 | 5.54 | -12.23 | -6.72  | 266 |
| 2jal | 7.77 | 6.20 | -20.71 | -6.87 | 435 | 1skj | 5.10 | 5.54 | -16.43 | -6.33  | 378 |
| 3elc | 3.15 | 4.72 | -5.31  | -6.20 | 202 | 2zas | 7.34 | 6.90 | -26.98 | -7.28  | 432 |
| 1e55 | 4.66 | 6.23 | -16.90 | -7.26 | 452 | 1o4o | 7.42 | 7.86 | -36.95 | -7.71  | 396 |
| 2c6i | 7.48 | 9.05 | -34.88 | -9.59 | 569 | 2vur | 6.40 | 5.96 | -22.99 | -6.32  | 298 |
| 2nng | 7.30 | 5.74 | -4.26  | -7.74 | 169 | 3n5j | 5.79 | 6.23 | -21.16 | -6.86  | 481 |
| 2pvv | 7.72 | 6.16 | -20.62 | -6.82 | 339 | 1biw | 6.33 | 6.77 | -16.41 | -8.07  | 258 |
| 1iup | 6.70 | 5.14 | -10.85 | -6.28 | 346 | 3e63 | 5.39 | 5.83 | -14.78 | -6.89  | 369 |
| 3l0k | 3.20 | 4.76 | -5.53  | -6.23 | 136 | 1zs0 | 5.93 | 6.36 | -21.26 | -7.05  | 266 |
| 3hv6 | 6.74 | 8.30 | -21.10 | -9.80 | 584 | 2ogz | 5.62 | 6.05 | -22.93 | -6.45  | 410 |
| 3i7i | 5.18 | 6.74 | -26.75 | -7.07 | 348 | 1zeo | 6.28 | 5.85 | -18.56 | -6.57  | 362 |
| 2vcw | 7.55 | 6.00 | -13.04 | -7.29 | 311 | 8lpr | 5.32 | 5.75 | -8.59  | -7.36  | 199 |
| 1usn | 7.59 | 6.04 | -13.37 | -7.32 | 455 | 1g49 | 7.92 | 7.49 | -20.88 | -8.68  | 447 |
| 2qpj | 3.73 | 5.28 | -10.45 | -6.51 | 346 | 2qd9 | 4.91 | 5.34 | -11.41 | -6.51  | 320 |
| 2uyq | 6.20 | 4.65 | -8.37  | -5.82 | 126 | 3mpt | 6.22 | 5.79 | -11.97 | -7.10  | 252 |
| 1qs4 | 5.66 | 7.20 | -22.26 | -8.15 | 568 | 1zyj | 6.64 | 7.07 | -22.06 | -7.97  | 483 |
| 2uzv | 6.01 | 7.55 | -24.93 | -8.40 | 736 | 3bar | 7.42 | 7.85 | -27.31 | -8.59  | 436 |

|      |      |      |        |        |     |       |      |      |        |       |     |
|------|------|------|--------|--------|-----|-------|------|------|--------|-------|-----|
| 1yp9 | 7.20 | 8.74 | -37.62 | -8.90  | 440 | 1q9m  | 4.85 | 4.42 | -12.61 | -5.10 | 602 |
| 3lok | 3.45 | 4.99 | -9.10  | -6.23  | 445 | 3d04  | 6.82 | 6.39 | -18.78 | -7.32 | 291 |
| 3ch9 | 2.34 | 3.88 | -3.94  | -5.13  | 346 | 3n2v  | 6.70 | 6.27 | -15.14 | -7.49 | 305 |
| 1e02 | 7.74 | 6.20 | -19.57 | -6.98  | 349 | 2j4z  | 6.25 | 6.68 | -20.46 | -7.56 | 329 |
| 3ecn | 4.85 | 6.38 | -10.14 | -8.11  | 369 | 2cgw  | 8.00 | 8.42 | -30.02 | -9.15 | 683 |
| 2jc0 | 5.51 | 7.04 | -13.79 | -8.71  | 390 | 2evc  | 6.82 | 6.40 | -18.01 | -7.40 | 291 |
| 3hzm | 6.10 | 7.63 | -26.93 | -8.32  | 416 | 1h5u  | 6.01 | 5.59 | -12.50 | -6.77 | 227 |
| 2ay3 | 4.00 | 5.52 | -14.51 | -6.48  | 276 | 2za0  | 3.03 | 3.44 | -7.20  | -4.21 | 504 |
| 1shd | 6.33 | 7.85 | -24.23 | -8.88  | 451 | 3gxl  | 6.68 | 6.27 | -21.05 | -6.93 | 400 |
| 3kac | 7.52 | 6.00 | -18.28 | -6.81  | 401 | 2j2i  | 6.18 | 6.59 | -15.62 | -7.89 | 503 |
| 1yei | 3.60 | 5.12 | -8.89  | -6.43  | 240 | 3cf8  | 5.92 | 6.33 | -11.56 | -7.90 | 370 |
| 3ow3 | 7.52 | 6.01 | -16.73 | -6.96  | 367 | luom  | 7.66 | 8.07 | -24.10 | -9.20 | 464 |
| 2b8v | 7.62 | 6.11 | -15.38 | -7.23  | 339 | luyg  | 6.05 | 6.46 | -13.47 | -7.90 | 655 |
| 1wn6 | 3.46 | 4.97 | -7.17  | -6.38  | 106 | 3k3b  | 6.13 | 6.54 | -14.35 | -7.93 | 456 |
| 2e1w | 5.70 | 7.21 | -10.40 | -9.26  | 200 | 2oht  | 7.80 | 7.40 | -11.79 | -9.39 | 308 |
| 3g3d | 5.15 | 6.66 | -14.76 | -8.07  | 241 | 2d1o  | 5.60 | 5.20 | -12.87 | -6.17 | 253 |
| 1o4e | 7.80 | 6.29 | -16.20 | -7.42  | 336 | 1pxj  | 5.44 | 5.04 | -12.75 | -5.96 | 222 |
| 2hxl | 4.55 | 6.05 | -24.24 | -6.33  | 379 | 3br9  | 4.22 | 4.62 | -4.56  | -6.13 | 176 |
| 1b9s | 4.66 | 6.16 | -22.42 | -6.65  | 402 | 2fwz  | 7.05 | 6.65 | -23.21 | -7.27 | 395 |
| 2obj | 3.52 | 5.02 | -6.82  | -6.49  | 227 | 3h21  | 7.70 | 7.30 | -24.02 | -8.12 | 508 |
| 3kjn | 7.14 | 5.64 | -13.31 | -6.76  | 423 | 2vwvw | 3.70 | 3.30 | -5.86  | -4.13 | 326 |
| 3k3i | 7.85 | 6.35 | -24.16 | -6.76  | 265 | 2ath  | 3.70 | 4.10 | -2.40  | -5.59 | 153 |
| 3n2u | 2.57 | 4.07 | -12.24 | -4.63  | 342 | 1apb  | 5.54 | 5.14 | -10.79 | -6.28 | 304 |
| 1lfo | 7.14 | 5.64 | -10.45 | -7.03  | 427 | 1zkl  | 5.00 | 5.40 | -11.68 | -6.57 | 151 |
| 3b92 | 7.06 | 5.57 | -13.51 | -6.64  | 292 | 1hdq  | 6.39 | 5.99 | -13.77 | -7.21 | 310 |
| 115s | 7.19 | 5.70 | -7.50  | -7.38  | 155 | 1q4k  | 7.92 | 8.32 | -27.81 | -9.21 | 511 |
| 1o41 | 7.66 | 6.17 | -13.41 | -7.50  | 312 | 3l5c  | 5.00 | 4.60 | -15.16 | -5.12 | 284 |
| 2bgd | 3.92 | 5.41 | -15.81 | -6.20  | 223 | 2qyl  | 3.49 | 3.89 | -7.42  | -4.82 | 463 |
| 2hd1 | 5.89 | 4.40 | -7.10  | -5.58  | 198 | 3fyz  | 6.87 | 6.48 | -17.09 | -7.59 | 626 |
| 2vcg | 7.82 | 6.34 | -12.00 | -7.87  | 491 | 2gm9  | 7.21 | 7.60 | -20.20 | -8.90 | 538 |
| 3kdu | 4.52 | 6.00 | -23.08 | -6.37  | 295 | 3kxz  | 7.57 | 7.96 | -31.25 | -8.39 | 530 |
| 3b9s | 6.25 | 7.73 | -22.15 | -8.91  | 414 | 1xor  | 5.30 | 5.69 | -10.21 | -7.12 | 119 |
| 2qcg | 7.60 | 9.08 | -28.17 | -10.26 | 365 | 9lpr  | 5.10 | 4.71 | -5.97  | -6.13 | 228 |
| 2vj7 | 4.70 | 6.18 | -17.50 | -7.14  | 314 | 1caq  | 5.36 | 5.75 | -16.08 | -6.65 | 386 |
| 2w4i | 5.66 | 7.14 | -17.64 | -8.49  | 496 | 3ipx  | 5.70 | 6.09 | -8.64  | -7.83 | 251 |
| 1fo3 | 4.00 | 5.48 | -15.88 | -6.30  | 382 | 2dua  | 5.74 | 5.35 | -10.97 | -6.57 | 254 |
| 3exo | 5.85 | 7.33 | -26.41 | -7.94  | 487 | 1qfl  | 7.02 | 6.63 | -28.29 | -6.78 | 415 |
| 1w84 | 7.45 | 8.93 | -32.68 | -9.63  | 568 | 3kag  | 6.99 | 6.60 | -20.40 | -7.47 | 402 |
| 3elj | 5.80 | 7.28 | -27.67 | -7.75  | 458 | 3l3a  | 4.40 | 4.79 | -8.63  | -5.98 | 222 |
| 2pnc | 6.90 | 5.42 | -13.57 | -6.43  | 230 | 3kec  | 7.15 | 7.53 | -27.75 | -8.11 | 382 |
| 3d27 | 5.35 | 6.82 | -17.60 | -8.04  | 465 | 2nno  | 5.46 | 5.84 | -18.84 | -6.53 | 422 |
| 2c4w | 3.05 | 4.52 | -8.75  | -5.60  | 292 | 1h1q  | 7.96 | 8.34 | -29.28 | -9.11 | 651 |
| 2o7v | 7.89 | 6.42 | -15.70 | -7.65  | 368 | 3chq  | 4.80 | 5.18 | -8.73  | -6.54 | 198 |
| 1g9c | 5.60 | 4.13 | -12.97 | -4.66  | 150 | 3fx6  | 6.85 | 6.47 | -19.24 | -7.39 | 328 |
| 2bd1 | 3.43 | 4.89 | -4.80  | -6.49  | 122 | 2ptz  | 6.62 | 6.24 | -22.58 | -6.75 | 410 |



|      |      |      |        |        |     |      |      |      |        |       |     |
|------|------|------|--------|--------|-----|------|------|------|--------|-------|-----|
| 3n9r | 4.70 | 6.16 | -16.67 | -7.19  | 475 | 3pch | 4.60 | 4.98 | -7.33  | -6.38 | 541 |
| 1pum | 7.60 | 9.06 | -33.35 | -9.75  | 558 | 1uy9 | 3.92 | 3.54 | -4.09  | -4.64 | 402 |
| 2a2x | 5.39 | 6.84 | -8.71  | -8.89  | 405 | 4erk | 6.10 | 5.72 | -11.02 | -7.09 | 264 |
| 3ovx | 7.16 | 8.61 | -37.66 | -8.71  | 527 | 1wqv | 5.01 | 4.64 | -8.87  | -5.75 | 395 |
| 2vtl | 4.15 | 5.60 | -15.26 | -6.52  | 353 | 1ftl | 6.74 | 6.37 | -16.72 | -7.48 | 306 |
| 2h5j | 4.74 | 3.29 | -6.49  | -4.06  | 632 | 2gm1 | 6.24 | 5.87 | -8.45  | -7.54 | 209 |
| 3le6 | 3.57 | 5.02 | -10.95 | -6.10  | 289 | 3dp3 | 6.05 | 6.42 | -20.92 | -7.16 | 389 |
| 1zaf | 5.21 | 6.66 | -15.74 | -7.98  | 383 | 2wd3 | 6.02 | 6.39 | -14.26 | -7.73 | 264 |
| 1mqi | 4.77 | 6.22 | -14.17 | -7.50  | 288 | 1a9u | 6.30 | 6.67 | -14.52 | -8.11 | 605 |
| 3fdn | 6.78 | 8.23 | -27.73 | -9.09  | 476 | 3fr5 | 4.43 | 4.06 | -3.80  | -5.40 | 361 |
| 1uu8 | 7.12 | 5.67 | -16.41 | -6.52  | 249 | 2w70 | 6.64 | 6.27 | -10.84 | -7.89 | 310 |
| 3c72 | 5.26 | 6.70 | -22.57 | -7.40  | 341 | 6upj | 7.68 | 7.32 | -21.76 | -8.35 | 466 |
| 3h2f | 3.70 | 5.14 | -14.87 | -5.91  | 311 | 1wbn | 3.67 | 4.03 | -8.25  | -4.95 | 412 |
| 1iep | 6.52 | 5.08 | -12.24 | -6.06  | 309 | 3g3m | 7.18 | 7.54 | -21.07 | -8.74 | 746 |
| 1cny | 4.10 | 5.54 | -17.84 | -6.20  | 714 | 2c6k | 5.49 | 5.85 | -12.27 | -7.16 | 218 |
| 2vev | 5.67 | 7.11 | -8.92  | -9.25  | 338 | 2wa4 | 2.57 | 2.93 | -2.63  | -3.91 | 210 |
| 1y2c | 6.66 | 8.10 | -13.59 | -10.22 | 239 | 1zzz | 7.52 | 7.88 | -32.05 | -8.20 | 444 |
| 1ctt | 6.96 | 5.52 | -10.61 | -6.85  | 337 | 3fv7 | 7.30 | 6.94 | -17.77 | -8.19 | 478 |
| 2uw8 | 5.06 | 6.49 | -12.59 | -8.04  | 286 | 2fl6 | 4.59 | 4.95 | -11.62 | -5.94 | 325 |
| 2bts | 7.85 | 6.42 | -16.30 | -7.59  | 358 | 1jao | 4.77 | 5.13 | -14.79 | -5.90 | 377 |
| 2xow | 7.62 | 6.19 | -15.90 | -7.30  | 339 | 3d28 | 5.78 | 5.42 | -12.02 | -6.57 | 381 |
| 1oir | 4.47 | 5.90 | -15.13 | -6.96  | 507 | 1zz3 | 3.72 | 4.07 | -6.44  | -5.18 | 189 |
| 1w2h | 4.40 | 5.83 | -14.51 | -6.92  | 306 | 2o63 | 6.54 | 6.89 | -19.73 | -7.94 | 342 |
| 5a3h | 7.96 | 6.53 | -15.44 | -7.82  | 328 | 1v0m | 6.95 | 6.60 | -14.30 | -8.02 | 424 |
| 2vv9 | 3.59 | 5.02 | -11.69 | -6.03  | 345 | 1yvx | 4.84 | 5.19 | -14.54 | -6.01 | 207 |
| 1noi | 3.00 | 4.43 | -9.20  | -5.42  | 122 | 2hk5 | 5.70 | 5.35 | -12.01 | -6.47 | 364 |
| 2xg5 | 2.91 | 4.34 | -5.91  | -5.60  | 242 | 2p2i | 7.85 | 8.20 | -25.05 | -9.30 | 373 |
| 3h0a | 3.96 | 5.39 | -3.00  | -7.36  | 172 | 1rth | 3.46 | 3.81 | -5.57  | -4.88 | 156 |
| 3c52 | 4.52 | 5.94 | -16.74 | -6.87  | 410 | 1y57 | 4.40 | 4.75 | -7.52  | -6.03 | 203 |
| 1bl7 | 7.52 | 6.10 | -10.92 | -7.63  | 314 | 1c29 | 7.62 | 7.97 | -21.63 | -9.29 | 511 |
| 1p10 | 4.71 | 6.13 | -7.45  | -8.00  | 144 | 1uyi | 5.52 | 5.17 | -9.69  | -6.43 | 429 |
| 2wij | 5.24 | 6.66 | -19.96 | -7.59  | 469 | 2hny | 7.85 | 7.50 | -16.37 | -9.11 | 604 |
| 2vex | 7.09 | 8.51 | -35.72 | -8.75  | 797 | 2xk8 | 7.40 | 7.05 | -22.10 | -7.95 | 392 |
| 1xur | 7.82 | 9.24 | -36.25 | -9.73  | 607 | 2hai | 7.77 | 8.12 | -32.03 | -8.54 | 572 |
| 2oi0 | 5.70 | 7.11 | -25.46 | -7.72  | 451 | 1mqj | 5.82 | 6.17 | -17.34 | -7.13 | 324 |
| 3bm6 | 4.00 | 5.41 | -20.80 | -5.74  | 209 | 2pj2 | 7.52 | 7.17 | -26.37 | -7.72 | 416 |
| 1b2m | 2.70 | 4.11 | -6.81  | -5.19  | 278 | 1n0t | 7.52 | 7.86 | -26.58 | -8.68 | 392 |
| 2osm | 6.15 | 4.74 | -4.73  | -6.28  | 200 | 1gi6 | 7.41 | 7.75 | -27.37 | -8.45 | 688 |
| 1o43 | 5.82 | 7.23 | -20.64 | -8.33  | 420 | 1sln | 6.72 | 6.38 | -19.05 | -7.28 | 500 |
| 1awf | 5.85 | 4.44 | -7.45  | -5.61  | 262 | 3g8i | 5.22 | 5.56 | -9.75  | -6.98 | 288 |
| 1xqc | 3.67 | 5.08 | -6.53  | -6.59  | 252 | 3k05 | 3.29 | 3.63 | -7.88  | -4.41 | 342 |
| 3nik | 3.36 | 4.77 | -5.57  | -6.24  | 114 | 2v5a | 7.14 | 7.48 | -30.53 | -7.77 | 374 |
| 1z6d | 6.64 | 5.24 | -6.74  | -6.80  | 189 | 2x7d | 6.77 | 7.11 | -25.10 | -7.74 | 397 |
| 2chx | 5.14 | 6.54 | -15.77 | -7.81  | 450 | 1ke5 | 5.29 | 4.96 | -5.51  | -6.51 | 144 |
| 1ymx | 7.24 | 5.84 | -16.31 | -6.77  | 311 | 1ym2 | 6.51 | 6.18 | -15.75 | -7.29 | 414 |

|      |      |      |        |        |     |      |      |      |        |        |     |
|------|------|------|--------|--------|-----|------|------|------|--------|--------|-----|
| 2uym | 7.82 | 9.21 | -34.08 | -9.90  | 579 | 3cqu | 6.19 | 6.52 | -18.91 | -7.49  | 288 |
| 3lkh | 4.24 | 5.63 | -18.23 | -6.30  | 714 | 2qhn | 7.08 | 6.75 | -21.29 | -7.59  | 384 |
| 2ohr | 4.24 | 5.63 | -13.18 | -6.76  | 290 | 2ggu | 5.66 | 5.33 | -10.33 | -6.59  | 197 |
| 3nsh | 7.84 | 6.45 | -7.36  | -8.46  | 304 | 2of2 | 6.60 | 6.93 | -28.20 | -7.21  | 373 |
| 3in4 | 7.64 | 9.03 | -22.20 | -10.74 | 535 | 3c8a | 6.54 | 6.21 | -17.43 | -7.18  | 399 |
| 1d1p | 7.05 | 5.66 | -15.19 | -6.61  | 487 | 1ndv | 6.13 | 6.46 | -18.65 | -7.43  | 368 |
| 3bmy | 5.54 | 6.93 | -26.94 | -7.32  | 646 | 3d14 | 6.92 | 6.59 | -4.01  | -8.97  | 222 |
| 2i1m | 5.54 | 4.15 | -8.02  | -5.14  | 154 | 1aq7 | 6.06 | 5.73 | -18.21 | -6.43  | 387 |
| 1wcc | 7.00 | 5.62 | -13.32 | -6.72  | 174 | 1aku | 6.00 | 5.67 | -9.83  | -7.13  | 334 |
| 3d4y | 7.19 | 5.81 | -17.58 | -6.60  | 455 | 2hd6 | 6.68 | 7.01 | -19.88 | -8.09  | 486 |
| 3n49 | 7.61 | 6.23 | -8.64  | -8.03  | 332 | 1lev | 7.37 | 7.70 | -20.93 | -8.97  | 570 |
| 2ea2 | 4.89 | 6.27 | -16.57 | -7.35  | 358 | 3gs7 | 6.93 | 7.26 | -9.02  | -9.45  | 175 |
| 1h08 | 5.30 | 6.68 | -21.18 | -7.51  | 646 | 3f80 | 5.28 | 5.61 | -12.74 | -6.77  | 202 |
| 1h01 | 3.15 | 4.53 | -7.44  | -5.73  | 301 | 2vwy | 7.74 | 7.41 | -19.84 | -8.67  | 315 |
| 1o4f | 3.49 | 4.87 | -12.44 | -5.75  | 530 | 2ica | 7.37 | 7.70 | -5.90  | -10.36 | 325 |
| 2viw | 6.84 | 5.46 | -12.74 | -6.56  | 275 | 2bmz | 6.84 | 6.52 | -20.11 | -7.37  | 460 |
| 1x78 | 4.85 | 6.23 | -12.72 | -7.65  | 336 | 1pdz | 5.48 | 5.80 | -20.26 | -6.35  | 370 |
| 1gwv | 7.85 | 9.22 | -35.06 | -9.82  | 606 | 2nq7 | 6.59 | 6.91 | -27.62 | -7.23  | 479 |
| 1rxp | 7.59 | 8.96 | -33.65 | -9.58  | 608 | 3pax | 5.44 | 5.12 | -20.83 | -5.32  | 182 |
| 2eep | 7.46 | 6.09 | -20.02 | -6.77  | 400 | 1ocn | 7.51 | 7.83 | -26.68 | -8.62  | 466 |
| 1hsl | 7.74 | 6.37 | -14.70 | -7.66  | 403 | 3ivi | 7.57 | 7.89 | -32.46 | -8.17  | 414 |
| 3fup | 6.11 | 4.74 | -7.45  | -6.03  | 601 | 3dp1 | 7.74 | 8.06 | -17.88 | -9.76  | 529 |
| 2vth | 6.85 | 5.48 | -6.36  | -7.18  | 150 | 2ggx | 7.57 | 7.26 | -21.53 | -8.29  | 455 |
| 1dzj | 3.30 | 4.66 | -7.29  | -5.94  | 301 | 1cgl | 6.80 | 6.49 | -15.35 | -7.77  | 322 |
| 1eat | 7.96 | 6.60 | -15.48 | -7.91  | 328 | 3gyn | 7.46 | 7.15 | -19.07 | -8.36  | 362 |
| 3lau | 4.27 | 5.63 | -14.05 | -6.68  | 303 | 2qzk | 6.76 | 6.45 | -10.09 | -8.20  | 389 |
| 1ykr | 7.40 | 8.76 | -35.37 | -9.13  | 590 | 2q7q | 4.71 | 4.40 | -8.92  | -5.41  | 522 |
| 3fh7 | 6.11 | 4.75 | -6.68  | -6.12  | 195 | 2h5a | 6.85 | 6.54 | -25.72 | -6.88  | 423 |
| 1h60 | 2.30 | 3.66 | -4.29  | -4.78  | 149 | 1yvz | 4.51 | 4.82 | -8.08  | -6.08  | 250 |
| 2x97 | 7.80 | 6.44 | -17.74 | -7.49  | 328 | 2h3e | 6.84 | 6.53 | -20.83 | -7.32  | 388 |
| 1z3c | 5.85 | 7.20 | -3.29  | -9.91  | 171 | 2zvj | 7.40 | 7.71 | -23.00 | -8.79  | 617 |
| 3duy | 5.00 | 6.35 | -19.62 | -7.19  | 297 | 3nzc | 6.10 | 6.41 | -15.37 | -7.66  | 615 |
| 3oy3 | 7.22 | 5.87 | -17.18 | -6.72  | 344 | 2iw8 | 4.74 | 4.43 | -6.72  | -5.66  | 486 |
| 1c3i | 4.70 | 6.05 | -11.39 | -7.52  | 261 | 3itu | 4.70 | 4.39 | -6.92  | -5.59  | 258 |
| 4vge | 6.41 | 7.76 | -6.89  | -10.36 | 237 | 2hzi | 5.94 | 5.63 | -8.12  | -7.23  | 211 |
| 2gqn | 4.21 | 5.55 | -9.70  | -6.97  | 346 | 2gg9 | 5.35 | 5.66 | -6.12  | -7.45  | 165 |
| 1f74 | 7.47 | 8.81 | -34.42 | -9.30  | 692 | 1idb | 7.70 | 8.01 | -20.23 | -9.47  | 495 |
| 3f8s | 7.09 | 8.43 | -26.77 | -9.47  | 446 | 3iu7 | 4.96 | 5.27 | -4.83  | -7.02  | 149 |
| 1e06 | 4.74 | 6.08 | -16.28 | -7.11  | 339 | 1tvo | 5.70 | 6.00 | -10.89 | -7.50  | 272 |
| 2wig | 4.74 | 6.08 | -17.81 | -6.96  | 392 | 2w0j | 4.14 | 4.44 | -13.24 | -5.07  | 678 |
| 1xos | 4.96 | 6.30 | -18.30 | -7.23  | 345 | 1q9d | 7.25 | 6.95 | -20.72 | -7.92  | 414 |
| 3kfa | 6.77 | 5.44 | -7.23  | -7.03  | 172 | 3gk4 | 4.31 | 4.01 | -5.01  | -5.21  | 345 |
| 3hkt | 3.83 | 5.16 | -8.07  | -6.57  | 142 | 2pzi | 7.77 | 7.47 | -23.14 | -8.44  | 503 |
| 3ewh | 7.52 | 6.19 | -14.29 | -7.44  | 347 | 3mxs | 4.55 | 4.85 | -5.74  | -6.35  | 165 |
| 3dz2 | 3.40 | 4.73 | -8.19  | -5.95  | 290 | 1r5h | 8.00 | 8.30 | -35.27 | -8.50  | 467 |

|      |      |      |        |        |     |      |      |      |        |       |     |
|------|------|------|--------|--------|-----|------|------|------|--------|-------|-----|
| 2w68 | 4.21 | 2.88 | -3.93  | -3.72  | 383 | 3iu8 | 5.82 | 5.52 | -18.48 | -6.11 | 415 |
| 3ej5 | 6.46 | 7.79 | -27.51 | -8.49  | 398 | 3f66 | 6.31 | 6.01 | -8.99  | -7.68 | 266 |
| 1o2r | 7.37 | 6.04 | -12.46 | -7.40  | 457 | 1zz1 | 5.42 | 5.72 | -15.74 | -6.65 | 364 |
| 3d50 | 5.00 | 6.33 | -8.13  | -8.22  | 322 | 1a2c | 7.14 | 6.84 | -24.36 | -7.44 | 370 |
| 3fal | 6.73 | 8.06 | -30.62 | -8.58  | 661 | 1rgl | 7.60 | 7.30 | -22.98 | -8.22 | 562 |
| 3d2t | 7.36 | 8.68 | -31.11 | -9.42  | 658 | 2wbd | 7.89 | 8.19 | -23.94 | -9.38 | 517 |
| 1v0o | 3.46 | 4.78 | -5.97  | -6.22  | 156 | 2vci | 6.34 | 6.04 | -12.55 | -7.40 | 408 |
| 1uy7 | 6.96 | 5.64 | -13.58 | -6.74  | 397 | 2bve | 5.00 | 5.29 | -11.00 | -6.48 | 265 |
| 5est | 7.24 | 5.92 | -14.87 | -7.02  | 434 | 2a4q | 6.66 | 6.37 | -20.19 | -7.15 | 297 |
| 1rzx | 2.36 | 3.67 | -4.08  | -4.83  | 227 | 3mvj | 7.04 | 6.75 | -22.29 | -7.50 | 356 |
| 2h15 | 5.13 | 6.44 | -14.74 | -7.76  | 318 | 2ria | 7.40 | 7.11 | -16.62 | -8.54 | 469 |
| 1cps | 7.60 | 6.29 | -19.60 | -7.10  | 342 | 2rgp | 7.18 | 6.89 | -25.02 | -7.45 | 317 |
| 1r58 | 7.55 | 8.86 | -36.62 | -9.16  | 464 | 1tmn | 7.70 | 7.41 | -24.08 | -8.27 | 367 |
| 2v77 | 6.30 | 4.99 | -13.22 | -5.85  | 398 | 3msk | 3.60 | 3.31 | -5.06  | -4.23 | 345 |
| 1o2t | 5.64 | 6.95 | -16.21 | -8.34  | 460 | 1l5r | 6.85 | 7.14 | -23.77 | -7.91 | 527 |
| 2i0y | 5.38 | 4.08 | -8.49  | -4.99  | 180 | 2x7s | 6.04 | 6.33 | -10.89 | -7.96 | 296 |
| 3h15 | 6.01 | 4.71 | -6.42  | -6.08  | 368 | 1grp | 7.77 | 7.48 | -30.69 | -7.76 | 482 |
| 2ohs | 3.77 | 5.07 | -11.33 | -6.14  | 421 | 3hii | 5.12 | 5.40 | -11.38 | -6.61 | 221 |
| 1o3e | 3.50 | 4.80 | -11.91 | -5.70  | 347 | 3ho2 | 7.78 | 7.50 | -21.47 | -8.63 | 555 |
| 2gsu | 4.97 | 6.27 | -18.72 | -7.15  | 299 | 1nhw | 4.68 | 4.40 | -7.91  | -5.50 | 260 |
| 1yc5 | 7.71 | 6.42 | -12.17 | -7.96  | 260 | 2hwh | 4.92 | 4.64 | -13.00 | -5.37 | 372 |
| 2pri | 5.74 | 7.03 | -23.44 | -7.79  | 460 | 1b8y | 5.90 | 6.18 | -20.54 | -6.86 | 367 |
| 3h2a | 6.40 | 7.69 | -25.69 | -8.52  | 409 | 2wi2 | 5.34 | 5.62 | -11.18 | -6.93 | 326 |
| 1uyf | 3.87 | 5.16 | -9.89  | -6.39  | 270 | 2vio | 6.82 | 7.10 | -8.76  | -9.25 | 197 |
| 2vts | 5.24 | 6.53 | -22.42 | -7.17  | 349 | 1v3x | 5.52 | 5.24 | -3.68  | -7.09 | 165 |
| 3fnm | 5.15 | 6.44 | -21.32 | -7.15  | 401 | 1tl9 | 6.46 | 6.74 | -24.31 | -7.29 | 448 |
| 3okh | 7.02 | 8.31 | -38.70 | -8.18  | 535 | 1w12 | 7.92 | 8.20 | -23.51 | -9.44 | 762 |
| 3er3 | 7.52 | 6.24 | -20.09 | -6.98  | 363 | 3kf7 | 6.39 | 6.11 | -12.67 | -7.49 | 197 |
| 2xfi | 4.04 | 5.32 | -5.12  | -7.06  | 194 | 3k5c | 7.21 | 6.93 | -24.15 | -7.59 | 380 |
| 2i4p | 7.70 | 6.43 | -17.91 | -7.45  | 379 | 3ind | 6.29 | 6.01 | -13.11 | -7.31 | 208 |
| 3c4e | 5.74 | 7.01 | -18.64 | -8.21  | 300 | 2io6 | 4.70 | 4.42 | -4.97  | -5.81 | 293 |
| 3gk2 | 6.70 | 5.43 | -14.33 | -6.37  | 386 | 2ow9 | 6.48 | 6.20 | -19.70 | -6.97 | 250 |
| 1u0g | 7.96 | 6.69 | -17.89 | -7.83  | 459 | 1cpi | 6.48 | 6.20 | -17.81 | -7.14 | 367 |
| 1ktt | 7.60 | 6.33 | -17.60 | -7.34  | 309 | 5fwg | 7.33 | 7.61 | -24.21 | -8.53 | 439 |
| 1ny0 | 7.92 | 6.65 | -22.15 | -7.38  | 311 | 3iof | 6.22 | 5.95 | -16.32 | -6.92 | 320 |
| 3h2m | 5.66 | 6.92 | -20.67 | -7.89  | 465 | 1ax1 | 6.07 | 6.34 | -14.52 | -7.64 | 383 |
| 1ahy | 7.74 | 9.00 | -17.28 | -11.16 | 308 | 1xuc | 7.60 | 7.87 | -23.15 | -9.01 | 790 |
| 3fee | 6.90 | 5.64 | -20.30 | -6.11  | 292 | 2c1a | 4.72 | 4.45 | -11.41 | -5.25 | 673 |
| 1y3x | 7.74 | 6.48 | -24.27 | -6.93  | 317 | 2xzw | 7.12 | 6.85 | -9.00  | -8.88 | 164 |
| 3cbs | 6.21 | 7.47 | -30.04 | -7.80  | 485 | 2usn | 5.34 | 5.61 | -11.23 | -6.91 | 326 |
| 2b8l | 6.14 | 7.40 | -12.66 | -9.31  | 374 | 1dx6 | 7.44 | 7.17 | -9.18  | -9.32 | 180 |
| 2x52 | 4.36 | 3.10 | -2.50  | -4.17  | 155 | 2w06 | 6.85 | 6.58 | -19.95 | -7.48 | 324 |
| 3ej3 | 6.91 | 5.65 | -9.34  | -7.15  | 296 | 2aie | 6.80 | 6.53 | -12.86 | -8.07 | 493 |
| 3ibl | 6.37 | 5.11 | -5.34  | -6.75  | 308 | 2c5y | 5.42 | 5.68 | -10.03 | -7.13 | 186 |
| 2g0h | 6.97 | 5.71 | -11.80 | -7.00  | 331 | 2h21 | 6.00 | 6.26 | -22.36 | -6.80 | 297 |

|       |      |      |        |       |     |      |      |      |        |       |     |
|-------|------|------|--------|-------|-----|------|------|------|--------|-------|-----|
| 2h03  | 6.48 | 5.23 | -8.97  | -6.58 | 614 | 2uue | 5.05 | 5.31 | -10.87 | -6.52 | 253 |
| 3jyr  | 3.64 | 4.89 | -8.37  | -6.16 | 299 | 3bl0 | 5.64 | 5.90 | -21.35 | -6.38 | 380 |
| 1kdw  | 7.00 | 5.75 | -17.83 | -6.50 | 300 | 2xkf | 7.49 | 7.75 | -21.88 | -8.95 | 572 |
| 2qc6  | 4.70 | 5.95 | -8.87  | -7.61 | 153 | 2wzx | 6.55 | 6.81 | -21.56 | -7.65 | 257 |
| 2azb  | 6.92 | 5.68 | -13.04 | -6.84 | 325 | 2cm7 | 4.07 | 4.33 | -3.87  | -5.77 | 150 |
| 3ibn  | 5.64 | 6.88 | -26.63 | -7.29 | 666 | 2fm5 | 7.55 | 7.29 | -11.19 | -9.30 | 369 |
| 1h6l  | 5.60 | 6.84 | -19.27 | -7.91 | 459 | 2weo | 6.22 | 5.96 | -20.88 | -6.52 | 360 |
| 1jg0  | 7.39 | 6.15 | -15.80 | -7.25 | 573 | 2uw4 | 4.60 | 4.85 | -9.07  | -6.04 | 292 |
| 1eei  | 3.00 | 1.76 | -0.75  | -2.43 | 187 | 2uw7 | 5.23 | 5.48 | -12.38 | -6.63 | 259 |
| 1pzj  | 4.07 | 5.31 | -6.79  | -6.90 | 178 | 3fw3 | 6.22 | 6.47 | -13.83 | -7.89 | 212 |
| 3du8  | 5.57 | 6.81 | -9.48  | -8.77 | 242 | 1me4 | 5.00 | 4.75 | -5.97  | -6.17 | 236 |
| 1o2p  | 6.24 | 5.00 | -7.26  | -6.42 | 220 | 2qyk | 6.52 | 6.77 | -25.79 | -7.21 | 609 |
| 3cib  | 3.96 | 5.20 | -11.43 | -6.30 | 332 | 1c2t | 4.80 | 5.05 | -17.18 | -5.57 | 394 |
| 2wf2  | 5.39 | 6.63 | -23.90 | -7.17 | 624 | 1dzp | 7.28 | 7.53 | -10.17 | -9.73 | 197 |
| 1yej  | 4.70 | 5.94 | -18.48 | -6.70 | 335 | 3og7 | 8.00 | 7.75 | -17.40 | -9.37 | 536 |
| 1j36  | 5.95 | 7.18 | -9.95  | -9.26 | 168 | 3nnv | 6.24 | 5.99 | -21.79 | -6.47 | 370 |
| 2nqi  | 5.70 | 4.47 | -11.43 | -5.27 | 274 | 2pj8 | 7.35 | 7.60 | -9.59  | -9.88 | 309 |
| 1bap  | 6.74 | 5.51 | -11.68 | -6.73 | 218 | 3pjc | 6.70 | 6.45 | -20.15 | -7.28 | 352 |
| 1lt6  | 2.30 | 3.53 | -4.14  | -4.62 | 184 | 3fv8 | 5.68 | 5.93 | -16.51 | -6.87 | 468 |
| 1o3g  | 5.70 | 6.93 | -20.69 | -7.90 | 531 | 3hqw | 6.07 | 5.83 | -13.21 | -7.03 | 262 |
| 1uyg  | 7.18 | 8.41 | -31.84 | -8.96 | 388 | 1w22 | 7.02 | 7.26 | -21.16 | -8.33 | 450 |
| 3ctq  | 4.73 | 5.95 | -16.54 | -6.90 | 395 | 3ny3 | 5.96 | 5.72 | -15.67 | -6.65 | 302 |
| 2qx0  | 5.55 | 4.33 | -9.07  | -5.29 | 235 | 1yw2 | 4.77 | 5.01 | -9.78  | -6.19 | 379 |
| 1j dj | 7.10 | 5.88 | -16.93 | -6.76 | 408 | 3aas | 7.00 | 6.76 | -18.69 | -7.85 | 356 |
| 2oph  | 4.43 | 5.65 | -13.21 | -6.78 | 278 | 2hxq | 7.15 | 7.39 | -22.96 | -8.34 | 391 |
| 2pu1  | 3.46 | 4.68 | -9.75  | -5.73 | 360 | 3mpe | 6.40 | 6.17 | -16.73 | -7.19 | 302 |
| 1f gi | 2.40 | 3.62 | -7.65  | -4.42 | 183 | 2zu3 | 5.10 | 5.33 | -8.50  | -6.77 | 322 |
| 3in3  | 6.00 | 7.22 | -20.20 | -8.36 | 398 | 2xg3 | 5.51 | 5.28 | -10.26 | -6.53 | 231 |
| 6gch  | 7.74 | 6.52 | -26.34 | -6.80 | 384 | 1gpy | 6.17 | 5.94 | -16.50 | -6.89 | 456 |
| 3k5x  | 6.74 | 5.53 | -15.80 | -6.37 | 267 | 2p99 | 4.70 | 4.93 | -6.96  | -6.34 | 216 |
| 1qk4  | 6.13 | 7.34 | -26.13 | -7.99 | 407 | 2gkl | 5.41 | 5.18 | -22.05 | -5.29 | 212 |
| 3own  | 7.10 | 5.89 | -17.12 | -6.76 | 240 | 2piy | 2.85 | 2.62 | -2.58  | -3.48 | 258 |
| 3fqk  | 6.22 | 5.01 | -12.42 | -5.94 | 301 | 1pg2 | 5.48 | 5.71 | -13.83 | -6.81 | 317 |
| 3erk  | 7.59 | 6.38 | -23.46 | -6.86 | 428 | 2ccs | 6.10 | 5.87 | -11.49 | -7.26 | 242 |
| 2vd4  | 7.92 | 6.71 | -15.98 | -8.03 | 431 | 1gny | 7.10 | 6.87 | -24.92 | -7.43 | 282 |
| 2pks  | 7.08 | 5.87 | -12.83 | -7.13 | 412 | 1kel | 7.00 | 6.77 | -23.52 | -7.42 | 304 |
| 1mqd  | 5.34 | 6.55 | -5.44  | -8.78 | 243 | 1rgk | 4.82 | 5.05 | -7.63  | -6.45 | 181 |
| 2osf  | 5.99 | 4.78 | -6.33  | -6.19 | 315 | 2bdy | 5.00 | 4.77 | -8.32  | -6.00 | 705 |
| 1r5g  | 4.43 | 5.64 | -9.83  | -7.08 | 146 | 1rrw | 7.38 | 7.16 | -27.67 | -7.58 | 465 |
| 1f8d  | 7.30 | 6.09 | -17.25 | -7.04 | 359 | 1yhs | 6.87 | 7.09 | -23.18 | -7.90 | 423 |
| 1ulg  | 7.39 | 6.19 | -21.96 | -6.73 | 455 | 2xk7 | 6.44 | 6.66 | -8.49  | -8.66 | 423 |
| 3i6m  | 6.81 | 8.01 | -26.11 | -8.93 | 673 | 2op3 | 7.62 | 7.40 | -16.51 | -8.95 | 346 |
| 1qf5  | 7.64 | 6.44 | -13.65 | -7.86 | 334 | 3l4t | 6.46 | 6.68 | -14.43 | -8.13 | 388 |
| 2qcn  | 5.19 | 3.99 | -5.73  | -5.12 | 176 | 2wou | 6.30 | 6.52 | -19.54 | -7.43 | 314 |
| 1jld  | 7.89 | 6.69 | -21.11 | -7.52 | 674 | 2fs8 | 7.17 | 7.39 | -12.60 | -9.31 | 414 |

|      |      |      |        |       |     |      |      |      |        |       |     |
|------|------|------|--------|-------|-----|------|------|------|--------|-------|-----|
| 1k6p | 6.77 | 5.57 | -7.01  | -7.25 | 172 | 2pj4 | 6.64 | 6.42 | -3.58  | -8.77 | 166 |
| 2wi3 | 7.66 | 6.46 | -21.78 | -7.14 | 277 | 3iut | 7.89 | 8.11 | -24.22 | -9.25 | 563 |
| 3bjc | 3.90 | 2.71 | -1.42  | -3.70 | 112 | 1sbr | 4.81 | 5.03 | -9.48  | -6.25 | 280 |
| 2wi7 | 7.96 | 9.15 | -36.96 | -9.55 | 578 | 2zm1 | 7.55 | 7.77 | -23.94 | -8.79 | 615 |
| 1o4j | 7.18 | 5.99 | -18.67 | -6.75 | 352 | 2wti | 4.96 | 4.74 | -5.24  | -6.24 | 180 |
| 3o8g | 6.66 | 5.47 | -11.14 | -6.72 | 223 | 1y3g | 7.96 | 7.74 | -27.58 | -8.42 | 413 |
| 1xlx | 7.60 | 6.41 | -19.92 | -7.24 | 484 | 3i7b | 6.92 | 7.14 | -13.75 | -8.84 | 362 |
| 2cmf | 7.82 | 6.63 | -13.55 | -8.14 | 548 | 2uw0 | 7.70 | 7.92 | -21.65 | -9.21 | 417 |
| 1oxq | 5.85 | 4.66 | -10.18 | -5.66 | 366 | 8gpb | 6.59 | 6.81 | -27.75 | -7.07 | 479 |
| 1y3v | 6.00 | 4.82 | -11.25 | -5.78 | 476 | 1rv1 | 7.22 | 7.44 | -27.89 | -7.95 | 600 |
| 1ke0 | 6.46 | 5.28 | -15.98 | -6.00 | 286 | 2wbb | 6.64 | 6.85 | -22.64 | -7.62 | 397 |
| 2vqm | 7.62 | 6.44 | -23.24 | -6.97 | 380 | 3iop | 6.08 | 5.87 | -14.87 | -6.93 | 266 |
| 2uu0 | 4.77 | 5.95 | -22.85 | -6.31 | 424 | 3bki | 7.39 | 7.18 | -21.44 | -8.19 | 488 |
| 3fcl | 7.34 | 6.16 | -15.92 | -7.26 | 382 | 2q6c | 5.77 | 5.56 | -10.20 | -6.93 | 386 |
| 2ew6 | 7.33 | 6.15 | -14.68 | -7.36 | 336 | 1nyy | 6.12 | 5.91 | -12.93 | -7.18 | 264 |
| 3lk8 | 5.13 | 6.31 | -15.95 | -7.46 | 234 | 2ggb | 6.10 | 6.31 | -17.26 | -7.34 | 440 |
| 2ph8 | 3.95 | 5.13 | -6.47  | -6.66 | 117 | 2ew5 | 7.49 | 7.28 | -18.77 | -8.58 | 353 |
| 2c1b | 2.70 | 3.87 | -8.32  | -4.72 | 342 | 1k06 | 6.35 | 6.56 | -14.19 | -7.98 | 206 |
| 3h03 | 7.24 | 6.07 | -19.10 | -6.83 | 375 | 3dx2 | 7.41 | 7.62 | -12.63 | -9.63 | 460 |
| 2qq7 | 5.44 | 6.61 | -18.34 | -7.67 | 616 | 1kc7 | 6.19 | 5.98 | -9.83  | -7.57 | 227 |
| 1mzs | 6.96 | 8.13 | -30.89 | -8.66 | 398 | 2vwu | 3.99 | 3.78 | -7.76  | -4.64 | 383 |
| 3hv5 | 7.60 | 6.43 | -16.19 | -7.62 | 338 | 3e0p | 7.10 | 6.89 | -20.75 | -7.84 | 233 |
| 3ft8 | 4.03 | 5.20 | -10.91 | -6.35 | 237 | 3ess | 6.76 | 6.97 | -23.09 | -7.73 | 293 |
| 117x | 5.74 | 4.58 | -9.67  | -5.59 | 235 | 2x9f | 7.74 | 7.53 | -18.29 | -8.98 | 513 |
| 3lhg | 4.67 | 5.83 | -15.80 | -6.80 | 384 | 1yyr | 7.85 | 7.64 | -13.13 | -9.62 | 308 |
| 2c68 | 7.89 | 9.05 | -35.93 | -9.50 | 564 | 3k5i | 5.86 | 5.66 | -17.63 | -6.38 | 329 |
| 2fwy | 5.26 | 6.42 | -13.89 | -7.81 | 353 | 2w6p | 4.50 | 4.70 | -5.42  | -6.16 | 173 |
| 1nzq | 2.70 | 3.86 | -6.28  | -4.89 | 358 | 3nc9 | 6.38 | 6.58 | -15.05 | -7.93 | 403 |
| 1bmk | 5.82 | 4.66 | -7.49  | -5.92 | 251 | 3dhk | 4.09 | 4.29 | -7.00  | -5.43 | 168 |
| 1p2a | 6.62 | 5.47 | -7.69  | -7.03 | 198 | 3l5f | 5.89 | 6.09 | -14.52 | -7.29 | 247 |
| 2f4j | 7.38 | 6.23 | -11.26 | -7.78 | 251 | 1o5f | 3.00 | 3.20 | -9.69  | -3.64 | 296 |
| 1txr | 2.00 | 3.15 | -3.31  | -4.16 | 121 | 2gvf | 6.68 | 6.48 | -22.10 | -7.14 | 398 |
| 2hwo | 7.74 | 6.59 | -11.65 | -8.27 | 490 | 3omg | 5.74 | 5.54 | -11.46 | -6.80 | 254 |
| 3i7c | 5.28 | 6.43 | -18.02 | -7.44 | 266 | 3dx4 | 5.38 | 5.19 | -14.85 | -5.97 | 382 |
| 3lmp | 5.40 | 6.55 | -19.99 | -7.42 | 385 | 1k08 | 6.26 | 6.07 | -18.88 | -6.85 | 275 |
| 3kme | 6.30 | 5.15 | -7.23  | -6.64 | 171 | 2f7o | 3.33 | 3.52 | -3.69  | -4.65 | 194 |
| 2ez7 | 7.92 | 9.06 | -39.76 | -9.16 | 680 | 2vto | 6.40 | 6.59 | -25.16 | -7.01 | 245 |
| 3kbz | 5.01 | 6.15 | -14.77 | -7.35 | 398 | 3c88 | 7.23 | 7.42 | -22.85 | -8.40 | 473 |
| 2q9n | 7.89 | 9.03 | -35.97 | -9.47 | 564 | 2qnz | 6.77 | 6.58 | -16.29 | -7.82 | 454 |
| 3hy7 | 6.82 | 7.96 | -22.75 | -9.18 | 647 | 1di8 | 4.70 | 4.89 | -6.56  | -6.32 | 164 |
| 2nqg | 6.72 | 5.58 | -15.75 | -6.45 | 242 | 1gi8 | 6.22 | 6.03 | -15.18 | -7.14 | 377 |
| 2qwg | 5.77 | 6.91 | -13.88 | -8.51 | 362 | 2xkd | 8.00 | 7.81 | -19.82 | -9.23 | 565 |
| 2r3l | 4.70 | 5.84 | -5.30  | -7.78 | 148 | 2hh5 | 7.21 | 7.40 | -22.34 | -8.41 | 556 |
| 3nkk | 3.73 | 4.87 | -11.21 | -5.86 | 118 | 3cho | 5.24 | 5.05 | -10.38 | -6.20 | 191 |
| 1o2k | 6.80 | 5.66 | -16.40 | -6.51 | 267 | 3mag | 4.44 | 4.63 | -16.67 | -5.01 | 763 |

|      |      |      |        |        |     |      |      |      |        |        |     |
|------|------|------|--------|--------|-----|------|------|------|--------|--------|-----|
| 4mbp | 6.66 | 7.80 | -19.31 | -9.26  | 623 | 2fov | 5.21 | 5.39 | -8.34  | -6.87  | 222 |
| 2f71 | 6.95 | 8.09 | -29.65 | -8.71  | 668 | 2b53 | 5.40 | 5.58 | -13.76 | -6.64  | 301 |
| 3e90 | 4.52 | 5.66 | -12.54 | -6.85  | 261 | 1f7b | 5.29 | 5.11 | -14.01 | -5.94  | 548 |
| 3grj | 4.52 | 5.65 | -6.95  | -7.36  | 258 | 1ndw | 6.62 | 6.44 | -8.80  | -8.31  | 228 |
| 1hyo | 5.65 | 4.52 | -4.44  | -6.00  | 199 | 2o7e | 6.22 | 6.40 | -19.99 | -7.22  | 239 |
| 2nmx | 6.89 | 5.77 | -19.23 | -6.39  | 408 | 1inf | 4.66 | 4.84 | -4.89  | -6.41  | 166 |
| 2gg3 | 3.51 | 4.63 | -14.08 | -5.26  | 488 | 1m21 | 6.85 | 6.67 | -19.08 | -7.68  | 289 |
| 2vi5 | 5.68 | 4.56 | -5.26  | -5.97  | 165 | 2vwv | 6.43 | 6.61 | -23.03 | -7.23  | 402 |
| 3hxb | 5.89 | 7.01 | -17.13 | -8.35  | 517 | 2qoa | 5.42 | 5.60 | -7.19  | -7.27  | 164 |
| 1agw | 4.99 | 6.11 | -19.53 | -6.85  | 493 | 3cwj | 7.85 | 8.03 | -12.49 | -10.22 | 371 |
| 2weh | 7.10 | 8.22 | -37.19 | -8.20  | 418 | 2qyn | 5.77 | 5.59 | -13.44 | -6.68  | 392 |
| 1y2d | 5.77 | 4.65 | -7.63  | -5.88  | 156 | 1ttm | 6.92 | 6.74 | -13.95 | -8.27  | 413 |
| 3mv5 | 5.38 | 4.26 | -9.28  | -5.18  | 235 | 2va7 | 6.69 | 6.87 | -8.12  | -8.98  | 239 |
| 2hdu | 4.60 | 5.72 | -16.97 | -6.53  | 394 | 2v0c | 5.00 | 4.82 | -8.00  | -6.10  | 338 |
| 1a46 | 6.60 | 5.48 | -8.71  | -6.96  | 270 | 2vtn | 4.80 | 4.98 | -10.30 | -6.10  | 254 |
| 2r4b | 6.25 | 5.13 | -8.81  | -6.46  | 217 | 1ypj | 3.70 | 3.52 | -5.16  | -4.52  | 221 |
| 1m51 | 7.39 | 6.28 | -13.83 | -7.61  | 416 | 2o3p | 5.54 | 5.72 | -8.21  | -7.34  | 123 |
| 1g3d | 7.74 | 6.63 | -19.71 | -7.57  | 578 | 3mkf | 7.54 | 7.71 | -33.55 | -7.82  | 486 |
| 1lhg | 3.85 | 4.96 | -9.73  | -6.13  | 290 | 2buc | 5.85 | 6.02 | -21.06 | -6.59  | 360 |
| 2a3c | 7.30 | 6.19 | -17.75 | -7.13  | 596 | 3hp5 | 6.55 | 6.72 | -10.80 | -8.53  | 219 |
| 3nil | 5.40 | 6.51 | -24.90 | -6.92  | 307 | 1c3r | 5.15 | 5.32 | -12.83 | -6.35  | 339 |
| 2wil | 3.23 | 2.12 | -0.65  | -2.94  | 345 | 1b9t | 7.77 | 7.94 | -22.22 | -9.20  | 440 |
| 1ke8 | 7.40 | 6.29 | -11.18 | -7.88  | 292 | 1ggm | 4.07 | 4.24 | -11.69 | -4.93  | 627 |
| 2oh0 | 6.08 | 7.19 | -9.32  | -9.33  | 157 | 2kce | 4.82 | 4.65 | -8.56  | -5.80  | 290 |
| 3n6k | 5.71 | 6.82 | -20.30 | -7.78  | 252 | 2fu8 | 4.68 | 4.85 | -5.44  | -6.37  | 157 |
| 3fej | 5.82 | 4.72 | -7.69  | -5.97  | 271 | 1dzm | 6.17 | 6.34 | -16.56 | -7.45  | 309 |
| 2pe0 | 4.12 | 5.22 | -14.49 | -6.06  | 311 | 2ork | 6.00 | 6.17 | -29.37 | -6.02  | 504 |
| 2g6p | 7.48 | 8.58 | -35.13 | -8.90  | 537 | 2wxd | 4.75 | 4.92 | -9.81  | -6.06  | 474 |
| 3hf6 | 7.29 | 6.19 | -21.37 | -6.79  | 295 | 3djf | 5.23 | 5.06 | -7.43  | -6.49  | 500 |
| 1tg5 | 8.00 | 6.91 | -16.53 | -8.26  | 493 | 2b1z | 5.40 | 5.57 | -8.13  | -7.13  | 198 |
| 1ga9 | 6.70 | 7.79 | -23.91 | -8.83  | 427 | 1vru | 6.37 | 6.21 | -16.99 | -7.22  | 351 |
| 3hkq | 7.68 | 8.77 | -14.05 | -11.13 | 381 | 3ft5 | 7.80 | 7.96 | -27.02 | -8.78  | 370 |
| 3e12 | 7.35 | 8.44 | -30.65 | -9.12  | 537 | 1pip | 7.80 | 7.96 | -27.02 | -8.78  | 370 |
| 2ha0 | 6.95 | 5.86 | -20.81 | -6.38  | 337 | 3lpb | 6.07 | 6.23 | -11.44 | -7.77  | 441 |
| 3hmv | 4.31 | 5.40 | -13.11 | -6.43  | 292 | 2zcr | 7.42 | 7.58 | -27.69 | -8.18  | 476 |
| 1b11 | 7.57 | 8.66 | -29.80 | -9.51  | 542 | 2vqj | 5.81 | 5.65 | -15.09 | -6.61  | 297 |
| 2f3e | 7.30 | 8.39 | -30.40 | -9.07  | 538 | 1yqy | 6.24 | 6.08 | -18.75 | -6.88  | 362 |
| 1clv | 6.21 | 7.29 | -16.80 | -8.78  | 417 | 2c6m | 6.07 | 6.23 | -10.70 | -7.84  | 221 |
| 2qdt | 7.30 | 8.38 | -38.55 | -8.31  | 520 | 3ls4 | 5.20 | 5.36 | -10.70 | -6.60  | 322 |
| 1waw | 6.82 | 5.74 | -18.57 | -6.41  | 263 | 2a8h | 7.91 | 7.75 | -22.40 | -8.91  | 575 |
| 1ms7 | 5.44 | 4.36 | -3.88  | -5.82  | 191 | 1lcp | 4.85 | 5.01 | -7.56  | -6.40  | 322 |
| 1q41 | 5.34 | 6.42 | -13.98 | -7.80  | 223 | 3h59 | 7.32 | 7.48 | -28.13 | -7.99  | 397 |
| 1avn | 8.00 | 6.92 | -18.25 | -8.12  | 381 | 1b4d | 5.38 | 5.54 | -17.10 | -6.26  | 327 |
| 2e2b | 7.66 | 6.58 | -21.48 | -7.33  | 435 | 1riw | 6.17 | 6.33 | -17.21 | -7.37  | 324 |
| 3jsw | 4.71 | 5.79 | -15.53 | -6.77  | 260 | 3mmr | 7.42 | 7.26 | -19.94 | -8.45  | 546 |

|      |      |      |        |       |     |      |      |      |        |        |     |
|------|------|------|--------|-------|-----|------|------|------|--------|--------|-----|
| 2yz3 | 6.40 | 5.33 | -10.56 | -6.57 | 182 | 3nnx | 7.92 | 7.76 | -36.46 | -7.62  | 512 |
| 2o8h | 5.74 | 4.67 | -10.33 | -5.66 | 254 | 1m9n | 7.46 | 7.62 | -13.47 | -9.55  | 308 |
| 2oc0 | 6.70 | 7.77 | -28.54 | -8.37 | 654 | 3b7r | 5.22 | 5.06 | -13.02 | -5.97  | 248 |
| 1o2u | 7.40 | 6.33 | -19.22 | -7.19 | 478 | 1c3e | 3.49 | 3.64 | -8.07  | -4.41  | 342 |
| 1ekb | 6.54 | 5.47 | -10.86 | -6.74 | 308 | 2q3z | 5.46 | 5.61 | -17.92 | -6.29  | 342 |
| 2ohv | 6.10 | 5.03 | -7.75  | -6.41 | 324 | 2jdo | 6.84 | 6.69 | -13.58 | -8.22  | 416 |
| 2w7x | 2.30 | 3.37 | -2.71  | -4.53 | 130 | 2g9r | 6.66 | 6.51 | -22.90 | -7.11  | 360 |
| 2xk4 | 6.10 | 7.17 | -24.16 | -7.92 | 320 | 3eq9 | 7.96 | 8.11 | -9.62  | -10.60 | 342 |
| 2ea4 | 6.20 | 7.26 | -23.00 | -8.16 | 445 | 2psx | 7.66 | 7.51 | -28.81 | -7.98  | 488 |
| 2vu3 | 3.97 | 5.03 | -11.66 | -6.05 | 219 | 2vpp | 6.60 | 6.74 | -23.96 | -7.34  | 414 |
| 1gcz | 5.08 | 6.14 | -11.49 | -7.64 | 430 | 3ho9 | 4.54 | 4.40 | -8.54  | -5.44  | 293 |
| 3c0z | 5.82 | 4.76 | -15.06 | -5.35 | 265 | 3d4l | 5.62 | 5.76 | -16.07 | -6.68  | 612 |
| 1gym | 5.80 | 4.74 | -7.00  | -6.07 | 243 | 1cbx | 6.52 | 6.66 | -18.89 | -7.69  | 499 |
| 2p33 | 5.70 | 6.76 | -22.25 | -7.51 | 310 | 2gd8 | 5.15 | 5.29 | -9.37  | -6.63  | 361 |
| 1ijr | 6.74 | 7.80 | -27.93 | -8.46 | 281 | 2p98 | 5.14 | 5.00 | -5.77  | -6.55  | 126 |
| 3cth | 5.15 | 6.21 | -17.99 | -7.13 | 235 | 1ax2 | 3.77 | 3.63 | -7.75  | -4.43  | 584 |
| 2wcx | 5.22 | 6.27 | -15.31 | -7.47 | 248 | 2f7i | 7.37 | 7.23 | -22.92 | -8.13  | 559 |
| 2ohp | 7.52 | 6.47 | -14.32 | -7.84 | 363 | 1rw8 | 5.89 | 6.03 | -18.24 | -6.85  | 463 |
| 1g3b | 7.21 | 6.16 | -10.87 | -7.72 | 230 | 1bqo | 7.39 | 7.26 | -17.26 | -8.68  | 449 |
| 2h23 | 5.92 | 4.87 | -5.22  | -6.42 | 148 | 3bi0 | 5.02 | 4.89 | -7.10  | -6.27  | 189 |
| 2xfj | 7.15 | 8.20 | -29.02 | -8.92 | 426 | 3lpu | 7.19 | 7.32 | -11.04 | -9.36  | 253 |
| 2vcb | 7.70 | 6.66 | -18.14 | -7.75 | 446 | 2eg8 | 7.18 | 7.05 | -20.09 | -8.13  | 688 |
| 1lt5 | 4.42 | 5.46 | -9.71  | -6.84 | 186 | 1kdy | 5.05 | 5.18 | -13.06 | -6.13  | 384 |
| 2xez | 6.52 | 5.48 | -8.11  | -7.01 | 198 | 1y2b | 6.40 | 6.53 | -13.65 | -7.99  | 416 |
| 1xnz | 5.77 | 6.81 | -15.03 | -8.26 | 448 | 2ooh | 6.92 | 7.05 | -22.41 | -7.92  | 556 |
| 3cqW | 5.03 | 6.07 | -13.76 | -7.32 | 546 | 1ux7 | 7.29 | 7.16 | -23.16 | -8.00  | 272 |
| 2bmV | 2.06 | 3.09 | -2.15  | -4.19 | 178 | 2rcu | 6.70 | 6.57 | -25.57 | -6.94  | 407 |
| 1eas | 3.22 | 4.25 | -4.14  | -5.65 | 194 | 1o34 | 7.02 | 7.15 | -21.42 | -8.14  | 423 |
| 2x2l | 5.52 | 6.55 | -12.08 | -8.17 | 363 | 2h2j | 7.80 | 7.67 | -27.45 | -8.33  | 380 |
| 1uu9 | 5.64 | 6.67 | -19.61 | -7.64 | 292 | 1oyn | 3.10 | 3.23 | -5.25  | -4.09  | 361 |
| 1m5c | 3.22 | 4.25 | -0.09  | -6.02 | 126 | 2a3b | 5.37 | 5.24 | -10.35 | -6.47  | 153 |
| 2cem | 7.19 | 6.16 | -11.00 | -7.71 | 248 | 2waj | 5.70 | 5.82 | -10.93 | -7.24  | 136 |
| 2i1r | 4.40 | 5.43 | -10.57 | -6.72 | 139 | 1y9l | 7.92 | 7.80 | -18.79 | -9.31  | 511 |
| 2vj6 | 7.64 | 8.67 | -33.80 | -9.15 | 555 | 1bkj | 7.27 | 7.15 | -23.16 | -7.98  | 495 |
| 3kwn | 6.19 | 7.22 | -17.19 | -8.63 | 541 | 1fo2 | 5.66 | 5.54 | -13.23 | -6.62  | 398 |
| 3bm9 | 6.52 | 7.54 | -18.61 | -8.97 | 445 | 1kdv | 3.72 | 3.60 | -7.29  | -4.42  | 608 |
| 2pg2 | 7.68 | 6.66 | -18.75 | -7.70 | 435 | 1b5g | 6.00 | 6.12 | -11.63 | -7.60  | 321 |
| 2dw7 | 5.24 | 6.26 | -18.21 | -7.19 | 447 | 1wun | 4.95 | 4.83 | -8.57  | -6.05  | 409 |
| 2vta | 6.64 | 5.62 | -7.61  | -7.26 | 180 | 2vgc | 6.55 | 6.43 | -16.82 | -7.56  | 275 |
| 1ung | 5.76 | 6.78 | -15.73 | -8.15 | 481 | 3k27 | 5.74 | 5.86 | -13.17 | -7.08  | 252 |
| 2v5x | 5.15 | 6.17 | -7.93  | -8.01 | 219 | 1re1 | 7.02 | 7.14 | -10.88 | -9.11  | 272 |
| 2hiz | 3.13 | 4.15 | -8.71  | -5.07 | 221 | 3gwx | 6.23 | 6.35 | -22.42 | -6.91  | 300 |
| 2xf0 | 7.64 | 8.66 | -25.74 | -9.88 | 600 | 3che | 6.15 | 6.04 | -14.80 | -7.18  | 352 |
| 1z4o | 7.52 | 6.50 | -20.16 | -7.35 | 467 | 3iu9 | 5.39 | 5.50 | -8.83  | -6.98  | 428 |
| 1hq5 | 4.59 | 5.61 | -10.70 | -6.95 | 349 | 3hvc | 7.36 | 7.25 | -31.13 | -7.38  | 458 |

|      |      |      |        |        |     |      |      |      |        |        |     |
|------|------|------|--------|--------|-----|------|------|------|--------|--------|-----|
| 1v0p | 5.39 | 6.40 | -22.53 | -6.99  | 402 | 1m1b | 5.86 | 5.75 | -6.62  | -7.53  | 149 |
| 1gz9 | 7.47 | 6.46 | -19.53 | -7.34  | 339 | 1qyg | 7.74 | 7.63 | -20.49 | -8.91  | 459 |
| 1nhx | 5.02 | 6.03 | -9.20  | -7.69  | 343 | 2xch | 6.24 | 6.13 | -18.29 | -6.99  | 275 |
| 3f9n | 3.24 | 4.24 | -8.23  | -5.25  | 222 | 1abf | 6.74 | 6.85 | -17.25 | -8.11  | 405 |
| 3gjs | 7.49 | 6.49 | -17.45 | -7.58  | 411 | 3dd8 | 5.40 | 5.51 | -9.87  | -6.89  | 334 |
| 2ewp | 5.82 | 4.82 | -15.82 | -5.36  | 253 | 2gg0 | 5.52 | 5.42 | -5.99  | -7.12  | 224 |
| 1kds | 6.85 | 5.85 | -23.24 | -6.14  | 444 | 3cwe | 4.19 | 4.29 | -6.95  | -5.44  | 316 |
| 1g3e | 6.19 | 7.19 | -20.42 | -8.30  | 372 | 2jew | 7.96 | 8.06 | -22.79 | -9.31  | 508 |
| 2gg8 | 7.70 | 6.70 | -20.29 | -7.62  | 583 | 3d1g | 7.89 | 7.99 | -31.31 | -8.42  | 502 |
| 2gg5 | 6.20 | 7.20 | -21.74 | -8.18  | 565 | 1ghz | 6.75 | 6.85 | -16.67 | -8.16  | 259 |
| 2q93 | 7.82 | 6.82 | -22.17 | -7.62  | 361 | 1bcj | 5.88 | 5.78 | -13.30 | -6.96  | 287 |
| 2ddf | 7.17 | 6.18 | -26.61 | -6.29  | 430 | 1bio | 6.89 | 6.99 | -25.78 | -7.51  | 547 |
| 1heg | 6.90 | 5.91 | -17.20 | -6.78  | 307 | 1j1a | 6.81 | 6.71 | -16.18 | -8.02  | 426 |
| 1n1v | 6.92 | 7.91 | -17.38 | -9.60  | 344 | 2bro | 7.70 | 7.60 | -24.48 | -8.51  | 407 |
| 1xdg | 5.64 | 6.63 | -20.56 | -7.49  | 334 | 1hp5 | 7.92 | 8.02 | -12.72 | -10.18 | 398 |
| 1yi3 | 7.52 | 6.53 | -21.99 | -7.22  | 280 | 3msl | 5.52 | 5.62 | -13.74 | -6.69  | 286 |
| 2gmk | 7.68 | 6.69 | -26.42 | -7.04  | 341 | 3hy9 | 7.36 | 7.27 | -18.18 | -8.61  | 333 |
| 3f18 | 7.60 | 6.61 | -18.84 | -7.63  | 346 | 1at6 | 5.64 | 5.73 | -12.90 | -6.93  | 252 |
| 2wej | 4.82 | 5.81 | -9.19  | -7.38  | 174 | 1f8e | 6.18 | 6.09 | -19.70 | -6.80  | 358 |
| 3hj0 | 7.80 | 6.81 | -25.59 | -7.28  | 498 | 1xge | 6.00 | 5.91 | -15.74 | -6.91  | 322 |
| 1rri | 8.00 | 7.02 | -15.73 | -8.48  | 612 | 1ndy | 7.89 | 7.98 | -24.14 | -9.08  | 555 |
| 1uy8 | 6.42 | 7.40 | -16.26 | -8.99  | 474 | 2gh9 | 5.11 | 5.02 | -9.00  | -6.28  | 417 |
| 2vie | 7.37 | 8.35 | -21.38 | -9.86  | 596 | 3nim | 7.57 | 7.66 | -23.66 | -8.67  | 536 |
| 3hdz | 7.72 | 6.74 | -12.42 | -8.40  | 389 | 3dcq | 5.37 | 5.46 | -15.53 | -6.30  | 619 |
| 3co9 | 5.38 | 6.36 | -21.35 | -7.04  | 421 | 1my3 | 7.64 | 7.73 | -12.11 | -9.84  | 290 |
| 1jq3 | 7.36 | 6.38 | -15.42 | -7.62  | 350 | 3i7g | 4.85 | 4.94 | -9.93  | -6.08  | 184 |
| 1oq5 | 6.36 | 5.38 | -6.37  | -7.04  | 150 | 3g8n | 4.91 | 4.82 | -11.78 | -5.74  | 473 |
| 3c1x | 7.40 | 6.42 | -19.23 | -7.32  | 387 | 3hq5 | 7.60 | 7.51 | -25.72 | -8.26  | 455 |
| 1kmv | 2.15 | 3.12 | -6.92  | -3.79  | 470 | 1zpb | 5.39 | 5.30 | -3.11  | -7.23  | 129 |
| 2z3z | 3.11 | 4.08 | -7.22  | -5.12  | 202 | 1y6b | 5.00 | 5.09 | -14.31 | -5.88  | 787 |
| 2ph6 | 5.85 | 4.88 | -2.87  | -6.65  | 156 | 2wi4 | 7.41 | 7.50 | -27.47 | -8.08  | 641 |
| 3i6z | 7.70 | 6.73 | -21.21 | -7.57  | 642 | 3fqh | 5.22 | 5.31 | -10.61 | -6.54  | 283 |
| 2uzl | 5.89 | 6.86 | -19.70 | -7.90  | 429 | 3fvl | 4.38 | 4.29 | -4.65  | -5.66  | 147 |
| 2f4b | 7.17 | 6.20 | -18.44 | -7.08  | 400 | 1kll | 6.46 | 6.37 | -17.26 | -7.44  | 275 |
| 1nnu | 6.15 | 7.12 | -21.56 | -8.09  | 464 | 2q1l | 6.00 | 5.92 | -15.96 | -6.90  | 379 |
| 3lp7 | 7.00 | 7.97 | -16.65 | -9.75  | 604 | 2j4k | 7.82 | 7.74 | -25.83 | -8.57  | 493 |
| 1hee | 7.39 | 6.42 | -10.80 | -8.10  | 235 | 3cp9 | 7.06 | 7.14 | -23.33 | -7.96  | 403 |
| 2r3m | 5.05 | 6.02 | -15.88 | -7.05  | 352 | 2xke | 5.85 | 5.77 | -20.81 | -6.25  | 304 |
| 1y6a | 7.72 | 8.69 | -23.02 | -10.18 | 572 | 2va6 | 7.32 | 7.40 | -11.15 | -9.46  | 287 |
| 3gwu | 4.42 | 5.39 | -13.45 | -6.39  | 291 | 1bmq | 7.96 | 7.88 | -26.10 | -8.75  | 502 |
| 2ai7 | 5.82 | 6.78 | -18.32 | -7.92  | 441 | 3fi3 | 4.92 | 4.84 | -13.12 | -5.64  | 402 |
| 1o32 | 7.38 | 8.34 | -24.58 | -9.55  | 491 | 3fed | 7.80 | 7.72 | -23.50 | -8.76  | 574 |
| 4apr | 6.16 | 5.20 | -8.18  | -6.61  | 209 | 2gnf | 6.57 | 6.65 | -20.36 | -7.54  | 404 |
| 3lcd | 6.19 | 5.23 | -12.88 | -6.21  | 345 | 1gzc | 5.54 | 5.62 | -17.41 | -6.35  | 268 |
| 1o3l | 7.43 | 6.47 | -17.33 | -7.56  | 291 | 1anf | 4.05 | 4.13 | -2.36  | -5.63  | 88  |



|      |      |      |        |       |     |      |      |      |        |       |     |
|------|------|------|--------|-------|-----|------|------|------|--------|-------|-----|
| 2ewb | 7.02 | 6.06 | -12.57 | -7.42 | 261 | 3ewj | 7.82 | 7.90 | -21.93 | -9.16 | 505 |
| 1n1g | 7.35 | 6.39 | -16.53 | -7.52 | 420 | 2vx1 | 3.70 | 3.78 | -7.43  | -4.67 | 608 |
| 2r3g | 7.28 | 6.32 | -20.00 | -7.10 | 303 | 3mhc | 4.57 | 4.65 | -7.68  | -5.87 | 359 |
| 3fzt | 7.19 | 6.23 | -19.21 | -7.05 | 475 | 3dv5 | 7.66 | 7.73 | -16.54 | -9.43 | 537 |
| 2flh | 7.60 | 6.64 | -28.13 | -6.81 | 495 | 2gtk | 6.54 | 6.47 | -18.24 | -7.47 | 275 |
| 3nw5 | 6.40 | 5.45 | -10.87 | -6.71 | 429 | 2v96 | 8.00 | 8.07 | -29.25 | -8.73 | 467 |
| 3doy | 7.18 | 6.23 | -15.89 | -7.35 | 301 | 1fyf | 4.23 | 4.30 | -10.21 | -5.15 | 331 |
| 2q95 | 6.00 | 5.05 | -6.30  | -6.57 | 258 | 1rsd | 6.90 | 6.83 | -18.47 | -7.97 | 367 |
| 1g4k | 6.28 | 5.33 | -11.71 | -6.46 | 379 | 1qk3 | 6.70 | 6.77 | -17.87 | -7.94 | 462 |
| 3fh8 | 6.52 | 5.57 | -12.13 | -6.77 | 302 | 3bls | 5.96 | 6.03 | -14.36 | -7.21 | 454 |
| 1ljt | 7.07 | 6.12 | -5.30  | -8.19 | 222 | 3hav | 5.40 | 5.47 | -8.14  | -6.99 | 198 |
| 2gnj | 6.83 | 7.78 | -26.48 | -8.57 | 502 | 1rwx | 7.23 | 7.16 | -15.19 | -8.75 | 581 |
| 2uzn | 6.08 | 5.13 | -11.22 | -6.24 | 422 | 2qlb | 6.65 | 6.59 | -16.31 | -7.82 | 463 |
| 3fla | 6.83 | 7.78 | -26.37 | -8.58 | 575 | 2ei6 | 6.34 | 6.40 | -15.73 | -7.62 | 399 |
| 2g9v | 7.70 | 6.75 | -19.84 | -7.73 | 395 | 2or4 | 5.60 | 5.66 | -14.69 | -6.67 | 379 |
| 3oki | 7.13 | 6.18 | -15.06 | -7.37 | 329 | 1gi4 | 5.72 | 5.78 | -14.43 | -6.86 | 261 |
| 3inh | 7.10 | 8.04 | -22.82 | -9.29 | 360 | 2a4g | 6.15 | 6.21 | -17.63 | -7.17 | 286 |
| 1rsi | 6.72 | 7.66 | -24.40 | -8.60 | 515 | 3aau | 6.92 | 6.98 | -20.77 | -7.97 | 302 |
| 1mqh | 7.24 | 6.30 | -23.48 | -6.75 | 338 | 3kmc | 5.10 | 5.16 | -7.58  | -6.61 | 258 |
| 1y3w | 4.39 | 5.33 | -15.07 | -6.16 | 341 | 1o4a | 7.70 | 7.64 | -11.81 | -9.74 | 174 |
| 1ile | 4.92 | 3.98 | -5.27  | -5.15 | 336 | 1py5 | 6.77 | 6.83 | -23.01 | -7.54 | 397 |
| 1rdi | 8.00 | 7.06 | -4.60  | -9.58 | 222 | li7i | 6.63 | 6.57 | -24.60 | -7.03 | 349 |
| 2bv4 | 5.40 | 4.46 | -4.20  | -5.94 | 247 | 2b55 | 5.10 | 5.05 | -4.28  | -6.76 | 156 |
| 2gz8 | 7.19 | 8.13 | -22.16 | -9.46 | 691 | 3kba | 6.70 | 6.65 | -16.84 | -7.86 | 271 |
| 2gni | 6.15 | 7.09 | -22.28 | -7.98 | 413 | 1a5v | 7.52 | 7.47 | -21.75 | -8.57 | 453 |
| 1ew9 | 7.49 | 8.43 | -34.86 | -8.71 | 683 | 2hj4 | 7.24 | 7.19 | -22.74 | -8.08 | 454 |
| 3f19 | 4.71 | 5.64 | -11.70 | -6.91 | 332 | 3fbb | 4.20 | 4.25 | -11.31 | -4.98 | 715 |
| 6cha | 3.14 | 4.07 | -7.91  | -5.04 | 188 | 2pj9 | 6.33 | 6.28 | -16.15 | -7.40 | 260 |
| 2wez | 3.73 | 4.66 | -4.09  | -6.23 | 183 | 3fl8 | 4.22 | 4.27 | -4.61  | -5.62 | 177 |
| 3dwb | 6.70 | 5.77 | -9.84  | -7.27 | 180 | 2op9 | 7.60 | 7.55 | -23.81 | -8.50 | 560 |
| 4aig | 7.00 | 6.07 | -20.11 | -6.74 | 730 | 1fwv | 6.22 | 6.17 | -16.58 | -7.21 | 491 |
| 2vcj | 6.80 | 7.73 | -25.88 | -8.55 | 283 | 1tou | 6.98 | 6.93 | -21.80 | -7.80 | 324 |
| 2vvt | 6.12 | 7.05 | -19.04 | -8.22 | 328 | 3mxr | 6.52 | 6.57 | -8.15  | -8.55 | 150 |
| 5abp | 5.66 | 4.74 | -7.44  | -6.02 | 318 | 2uw6 | 6.52 | 6.57 | -15.42 | -7.88 | 373 |
| 2cmc | 8.00 | 7.08 | -19.45 | -8.23 | 512 | 1zdp | 4.22 | 4.27 | -4.87  | -5.60 | 191 |
| 3p8e | 5.41 | 6.33 | -16.74 | -7.42 | 288 | 3igp | 8.00 | 7.95 | -22.65 | -9.17 | 546 |
| 1ax0 | 5.60 | 6.52 | -19.54 | -7.43 | 290 | 3fr2 | 5.81 | 5.76 | -14.62 | -6.82 | 349 |
| 1q6n | 7.06 | 6.14 | -14.22 | -7.38 | 243 | 2wtj | 4.92 | 4.96 | -4.08  | -6.66 | 122 |
| 1z5m | 3.97 | 4.89 | -5.34  | -6.43 | 194 | 3fzc | 5.35 | 5.31 | -14.38 | -6.19 | 674 |
| 1vcj | 5.42 | 4.50 | -12.05 | -5.26 | 434 | 2wot | 6.74 | 6.70 | -21.68 | -7.48 | 427 |
| 1hy7 | 6.37 | 7.29 | -22.13 | -8.28 | 598 | 2v6n | 6.10 | 6.14 | -20.32 | -6.82 | 378 |
| 3gb2 | 7.68 | 8.59 | -24.39 | -9.92 | 684 | 1wu1 | 7.68 | 7.64 | -13.64 | -9.56 | 305 |
| 2cct | 7.43 | 8.34 | -34.98 | -8.58 | 590 | 1xn0 | 5.86 | 5.90 | -18.42 | -6.66 | 727 |
| 2r8q | 6.00 | 6.91 | -24.83 | -7.49 | 407 | 2x91 | 6.15 | 6.19 | -7.90  | -8.04 | 86  |
| 2fvc | 6.52 | 5.61 | -16.41 | -6.43 | 454 | 2wzz | 6.37 | 6.33 | -14.71 | -7.61 | 323 |

|      |      |      |        |       |     |      |      |      |        |       |     |
|------|------|------|--------|-------|-----|------|------|------|--------|-------|-----|
| 3dp2 | 3.20 | 4.11 | -6.70  | -5.20 | 180 | 3iog | 6.44 | 6.48 | -19.00 | -7.42 | 288 |
| 2iw6 | 4.19 | 5.10 | -11.26 | -6.18 | 301 | 1k3t | 5.59 | 5.55 | -19.48 | -6.06 | 394 |
| 3fr4 | 6.46 | 5.56 | -7.17  | -7.21 | 164 | 2oah | 7.00 | 7.04 | -16.51 | -8.44 | 480 |
| 2c4f | 7.13 | 6.23 | -15.23 | -7.41 | 329 | 1kvo | 5.30 | 5.26 | -4.13  | -7.08 | 106 |
| 2gmv | 3.06 | 3.96 | -8.45  | -4.83 | 214 | 1cx9 | 5.51 | 5.47 | -14.69 | -6.40 | 388 |
| 2o7n | 7.89 | 8.79 | -29.56 | -9.72 | 571 | 1u6q | 5.28 | 5.31 | -11.06 | -6.51 | 337 |
| 2p2h | 5.75 | 4.85 | -10.72 | -5.88 | 315 | 3fxz | 5.92 | 5.89 | -10.02 | -7.42 | 212 |
| 2w6n | 6.60 | 7.50 | -17.94 | -8.97 | 347 | 2uwp | 7.77 | 7.80 | -19.02 | -9.29 | 453 |
| 1vj5 | 6.74 | 5.84 | -12.67 | -7.10 | 266 | 3fei | 5.74 | 5.77 | -14.60 | -6.82 | 595 |
| 1h1r | 5.85 | 4.95 | -11.54 | -5.95 | 366 | 3eft | 4.80 | 4.77 | -9.18  | -5.91 | 174 |
| 1bm7 | 7.89 | 6.99 | -17.80 | -8.26 | 325 | 2ga2 | 5.15 | 5.12 | -9.61  | -6.37 | 204 |
| 3hrb | 6.77 | 5.87 | -17.32 | -6.71 | 319 | 3ejt | 2.82 | 2.79 | -2.27  | -3.75 | 210 |
| 3ehx | 7.44 | 6.54 | -18.26 | -7.58 | 448 | 1z9g | 5.10 | 5.07 | -22.94 | -5.07 | 668 |
| 2ilp | 5.68 | 6.58 | -27.03 | -6.81 | 511 | 1ke9 | 4.00 | 4.02 | -6.64  | -5.09 | 121 |
| 1f28 | 4.11 | 5.00 | -11.12 | -6.06 | 388 | 1zgv | 6.82 | 6.84 | -14.82 | -8.33 | 434 |
| 1ayv | 6.59 | 5.70 | -15.09 | -6.68 | 388 | 2ovz | 6.68 | 6.66 | -20.31 | -7.55 | 402 |
| 1thl | 5.80 | 6.69 | -20.87 | -7.55 | 233 | 3hnb | 7.00 | 6.98 | -21.55 | -7.89 | 430 |
| 2vey | 6.60 | 5.71 | -9.47  | -7.22 | 270 | 3l5e | 6.41 | 6.43 | -18.11 | -7.44 | 397 |
| 1cnw | 6.68 | 7.57 | -9.73  | -9.83 | 213 | 3chf | 7.82 | 7.84 | -22.29 | -9.05 | 624 |
| 2ohu | 5.21 | 6.10 | -19.46 | -6.84 | 345 | 3l0v | 5.12 | 5.10 | -13.32 | -5.99 | 336 |
| 2vtt | 5.76 | 4.87 | -8.98  | -6.07 | 245 | 2p8o | 6.51 | 6.53 | -20.98 | -7.31 | 331 |
| 6abp | 4.84 | 5.73 | -10.84 | -7.11 | 214 | 3nin | 6.21 | 6.19 | -10.82 | -7.77 | 208 |
| 3inf | 7.52 | 6.63 | -11.73 | -8.32 | 390 | 3el8 | 6.26 | 6.24 | -19.17 | -7.07 | 455 |
| 1uxb | 5.40 | 6.28 | -15.42 | -7.48 | 473 | 3m1k | 7.46 | 7.48 | -29.31 | -7.88 | 422 |
| 3msj | 7.60 | 6.72 | -14.32 | -8.19 | 422 | 3omc | 5.89 | 5.91 | -7.51  | -7.67 | 208 |
| 2z94 | 7.16 | 6.28 | -19.46 | -7.09 | 339 | 1ym4 | 6.85 | 6.83 | -13.42 | -8.44 | 411 |
| 5hvp | 7.96 | 7.08 | -25.43 | -7.67 | 473 | 1gi9 | 6.77 | 6.78 | -15.83 | -8.15 | 238 |
| 1ett | 7.72 | 8.60 | -32.81 | -9.15 | 581 | 3guz | 4.09 | 4.08 | -6.07  | -5.21 | 487 |
| 2i6b | 7.37 | 6.49 | -12.16 | -8.07 | 332 | 1ro6 | 6.24 | 6.23 | -11.95 | -7.72 | 307 |
| 2zdz | 7.19 | 8.07 | -18.28 | -9.74 | 588 | 1c8k | 6.50 | 6.49 | -13.41 | -7.95 | 309 |
| 2veu | 7.15 | 6.27 | -23.16 | -6.74 | 365 | 3bi6 | 5.64 | 5.63 | -8.04  | -7.23 | 264 |
| 2hzy | 6.85 | 7.73 | -22.54 | -8.86 | 601 | 2duv | 7.42 | 7.43 | -22.85 | -8.41 | 615 |
| 2brc | 6.80 | 5.92 | -18.36 | -6.69 | 293 | 3dp0 | 6.15 | 6.14 | -23.51 | -6.52 | 371 |
| 3e8n | 6.48 | 7.36 | -17.21 | -8.83 | 666 | 3mnu | 5.32 | 5.31 | -11.62 | -6.45 | 253 |
| 3igb | 7.30 | 6.43 | -22.02 | -7.07 | 471 | 2q15 | 7.25 | 7.24 | -30.80 | -7.41 | 541 |
| 1lqe | 4.00 | 4.87 | -18.36 | -5.20 | 198 | 1y2f | 6.82 | 6.83 | -12.82 | -8.49 | 451 |
| 1qf0 | 3.60 | 2.73 | -7.21  | -3.20 | 242 | 3phe | 4.81 | 4.80 | -8.50  | -6.02 | 224 |
| 2evm | 6.62 | 7.49 | -16.88 | -9.05 | 503 | 2c6l | 7.15 | 7.14 | -20.55 | -8.22 | 341 |
| 2xd6 | 6.38 | 5.51 | -12.07 | -6.70 | 204 | loiq | 7.44 | 7.45 | -8.48  | -9.77 | 180 |
| 1vyw | 7.13 | 6.26 | -15.15 | -7.47 | 329 | 2rk7 | 4.28 | 4.27 | -12.11 | -4.93 | 342 |
| 2btr | 7.40 | 6.54 | -19.09 | -7.49 | 370 | 2pj5 | 3.00 | 2.99 | -2.60  | -4.00 | 133 |
| 1ke2 | 4.62 | 5.48 | -14.63 | -6.42 | 397 | 1fwu | 4.32 | 4.31 | -4.14  | -5.73 | 178 |
| 2w1h | 6.15 | 7.01 | -26.56 | -7.48 | 521 | 2uzj | 7.64 | 7.65 | -20.86 | -8.90 | 391 |
| 1me3 | 4.77 | 5.63 | -14.32 | -6.66 | 343 | 3cde | 7.44 | 7.44 | -7.82  | -9.83 | 361 |
| 3fi2 | 7.19 | 8.05 | -31.11 | -8.53 | 418 | 3g4k | 5.80 | 5.80 | -14.48 | -6.87 | 306 |

|      |      |      |        |       |     |      |      |      |        |       |     |
|------|------|------|--------|-------|-----|------|------|------|--------|-------|-----|
| 1jrs | 3.60 | 4.46 | -8.58  | -5.53 | 345 | 1sm2 | 7.92 | 7.92 | -31.74 | -8.28 | 467 |
| 3igg | 3.16 | 4.02 | -7.89  | -4.96 | 295 | 3nii | 4.19 | 4.19 | -11.53 | -4.87 | 627 |
| 2wf5 | 4.55 | 5.41 | -11.10 | -6.63 | 219 | 3g8o | 7.21 | 7.21 | -25.35 | -7.87 | 285 |
| 2viv | 6.80 | 5.95 | -10.72 | -7.43 | 182 | 1nms | 6.92 | 6.92 | -23.41 | -7.64 | 634 |
| 3c10 | 5.35 | 4.50 | -4.06  | -6.00 | 203 | 3fgc | 6.18 | 6.18 | -12.23 | -7.63 | 457 |

**Supplementary Table 5.** Calculation of Wang's testset using KECSA compared with experimental data.

| PDB ID | exp. Data (pKd) | KECSA (pKd) | PDB ID | exp. Data (pKd) | KECSA (pKd) |
|--------|-----------------|-------------|--------|-----------------|-------------|
| 1e96   | 5.22            | 6.34        | 1tng   | 2.93            | 5.25        |
| 1a46   | 5.70            | 6.93        | 1tnh   | 3.37            | 5.70        |
| 1a5g   | 10.15           | 7.71        | 1tni   | 4.00            | 5.72        |
| 1abe   | 6.52            | 5.58        | 1tnj   | 1.96            | 3.83        |
| 1abf   | 5.42            | 5.60        | 1tnk   | 1.49            | 4.70        |
| 1adb   | 8.40            | 7.19        | 1tnl   | 1.88            | 6.12        |
| 1add   | 6.74            | 5.84        | 1yyy   | 5.09            | 5.82        |
| 1af2   | 3.10            | 5.79        | 1zzz   | 5.14            | 5.59        |
| 1apb   | 5.82            | 5.33        | 2ak3   | 3.86            | 4.48        |
| 1apt   | 9.40            | 7.96        | 2cgr   | 7.28            | 6.43        |
| 1apw   | 8.00            | 6.79        | 2csc   | 3.36            | 5.68        |
| 1b5g   | 8.00            | 7.81        | 2ctc   | 3.89            | 5.81        |
| 1ba8   | 9.00            | 6.43        | 2gbp   | 7.40            | 5.89        |
| 1bap   | 6.85            | 5.48        | 2pk4   | 4.32            | 4.58        |
| 1bb0   | 8.36            | 7.09        | 2qwb   | 2.74            | 4.57        |
| 1bbz   | 5.82            | 6.32        | 2qwc   | 3.55            | 4.68        |
| 1bcu   | 3.28            | 4.88        | 2qwd   | 4.85            | 4.49        |
| 1bhf   | 4.38            | 5.39        | 2qwe   | 7.48            | 5.24        |
| 1bra   | 1.82            | 5.81        | 2qwf   | 5.67            | 5.14        |
| 1bxo   | 10.00           | 7.37        | 2qwg   | 3.64            | 4.89        |
| 1bzm   | 6.03            | 6.78        | 2sns   | 6.70            | 4.66        |
| 1cbx   | 6.35            | 6.56        | 2tmn   | 5.89            | 5.91        |
| 1cla   | 5.28            | 3.15        | 2xim   | 2.28            | 4.95        |
| 1d3d   | 9.09            | 7.97        | 2xis   | 5.82            | 4.76        |
| 1d3p   | 7.39            | 7.67        | 3cla   | 4.94            | 3.25        |
| 1dhf   | 7.40            | 5.84        | 3cpa   | 4.00            | 5.64        |
| 1dr1   | 5.57            | 4.76        | 3fx2   | 9.30            | 6.83        |
| 1drf   | 7.44            | 6.27        | 3ptb   | 4.50            | 5.48        |
| 1ela   | 6.36            | 6.58        | 3tmn   | 5.90            | 5.01        |
| 1etr   | 7.41            | 6.38        | 4cla   | 5.47            | 3.81        |
| 1ets   | 8.22            | 7.74        | 4sga   | 7.30            | 6.43        |
| 1exw   | 3.90            | 5.68        | 4tim   | 2.16            | 4.84        |
| 1fkb   | 9.70            | 8.50        | 4tln   | 3.72            | 5.62        |

|      |      |       |      |      |      |
|------|------|-------|------|------|------|
| 1fkf | 9.40 | 8.26  | 4xia | 1.54 | 3.26 |
| 1fmo | 8.64 | 5.50  | 5abp | 6.64 | 5.62 |
| 1hsl | 7.19 | 5.70  | 5cna | 2.00 | 4.03 |
| 1hvr | 9.51 | 10.16 | 5p21 | 5.32 | 6.06 |
| 1inc | 9.34 | 5.70  | 5sga | 2.85 | 3.49 |
| 1mnc | 9.00 | 6.52  | 5tln | 6.37 | 6.33 |
| 1ppc | 6.16 | 6.92  | 6abp | 5.64 | 5.38 |
| 1pph | 5.92 | 6.26  | 6rnt | 2.37 | 4.21 |
| 1rbp | 6.72 | 6.24  | 6tim | 3.21 | 5.21 |
| 1rgk | 4.31 | 4.01  | 7abp | 5.54 | 5.56 |
| 1rgl | 4.43 | 4.06  | 7est | 7.60 | 6.17 |
| 1rnt | 5.19 | 4.73  | 7tim | 5.40 | 5.11 |
| 1sre | 3.85 | 6.54  | 7tln | 2.47 | 3.84 |
| 1tet | 6.08 | 6.05  | 8abp | 4.00 | 5.60 |
| 1tha | 5.35 | 6.51  | 8xia | 2.95 | 5.21 |
| 1tlp | 7.55 | 6.77  | 9aat | 8.22 | 5.58 |
| 1tmn | 7.30 | 6.94  | 9abp | 8.00 | 5.45 |

---
